# Supplementary material for: Global estimates of the fitness advantage of SARS-CoV-2 variant Omicron
Source: bioRxiv or medRxiv preprint supplement (doi:10.1101/2022.06.15.22276436), 2022-06-16

### Argentina

daily data, daily predictions

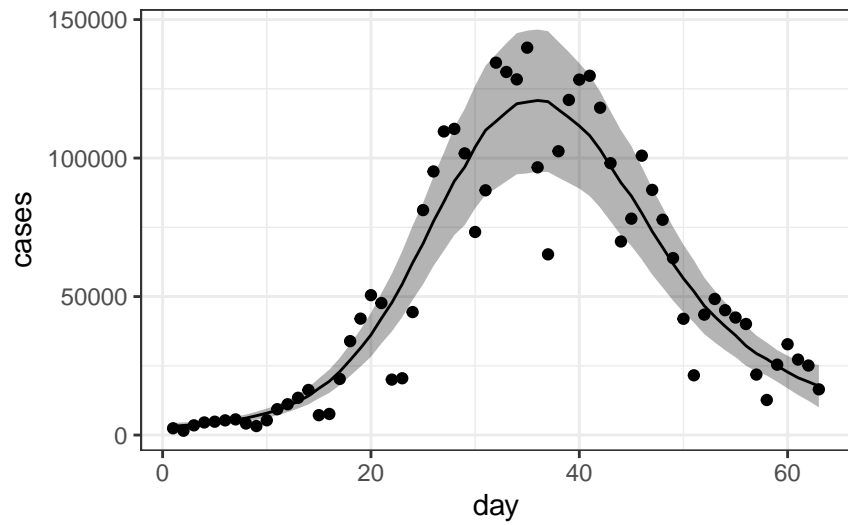

### Argentina

weekly data, weekly predictions

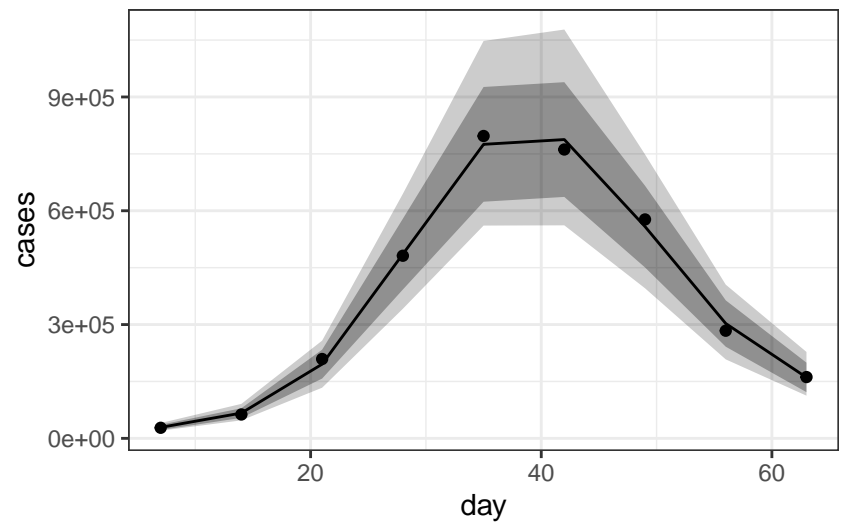

### Argentina

daily data, daily predictions

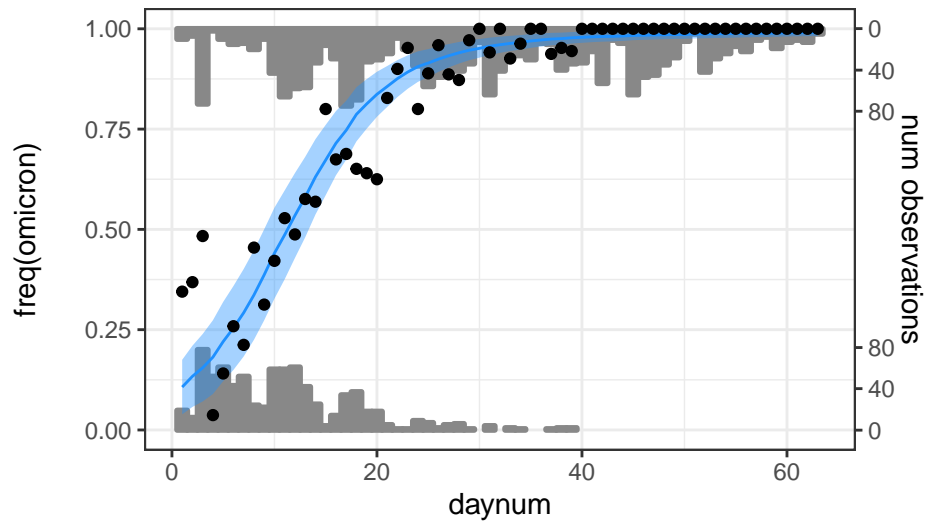

### Argentina

weekly data, weekly predictions

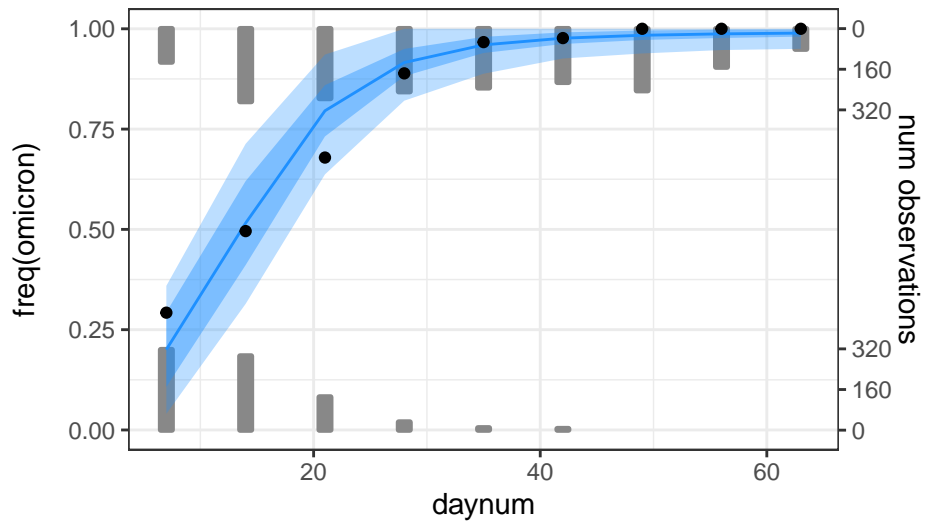

### Argentina

daily predictions

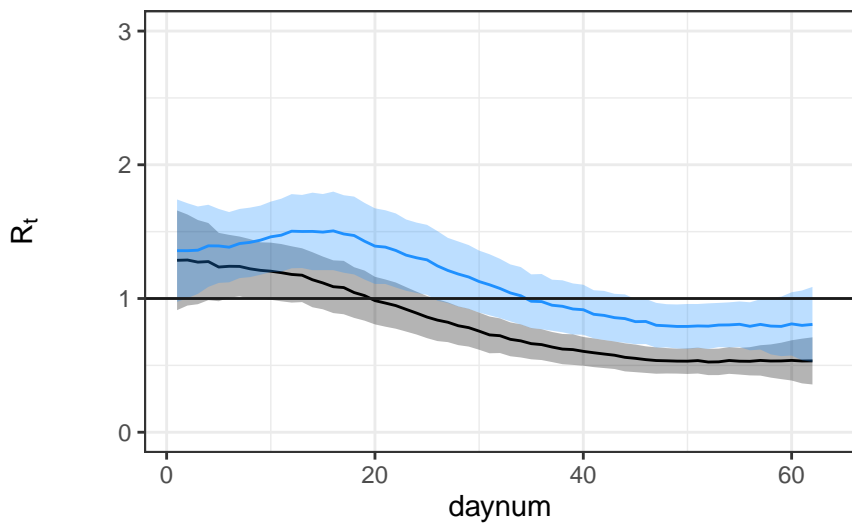

Australia  
daily data, daily predictions

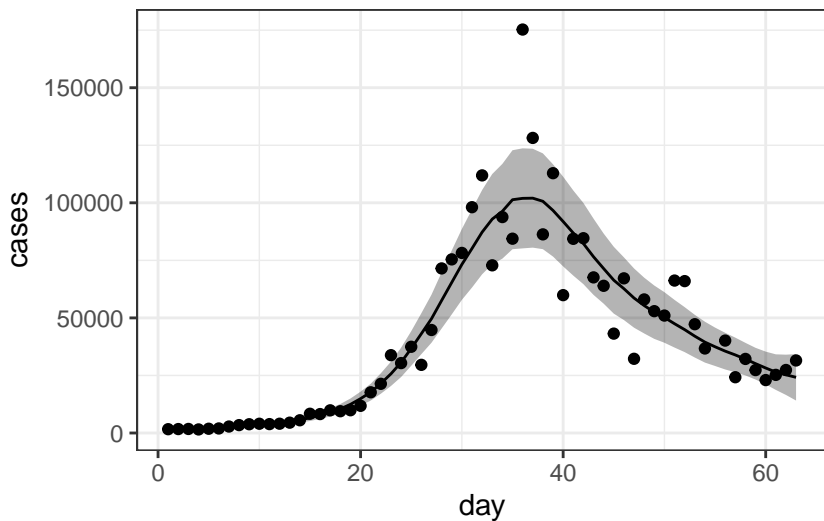

Australia  
weekly data, weekly predictions

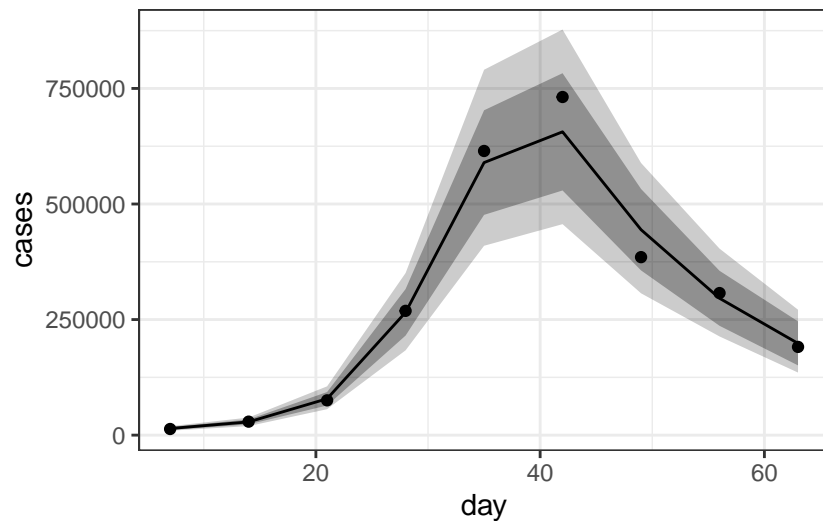

Australia  
daily data, daily predictions

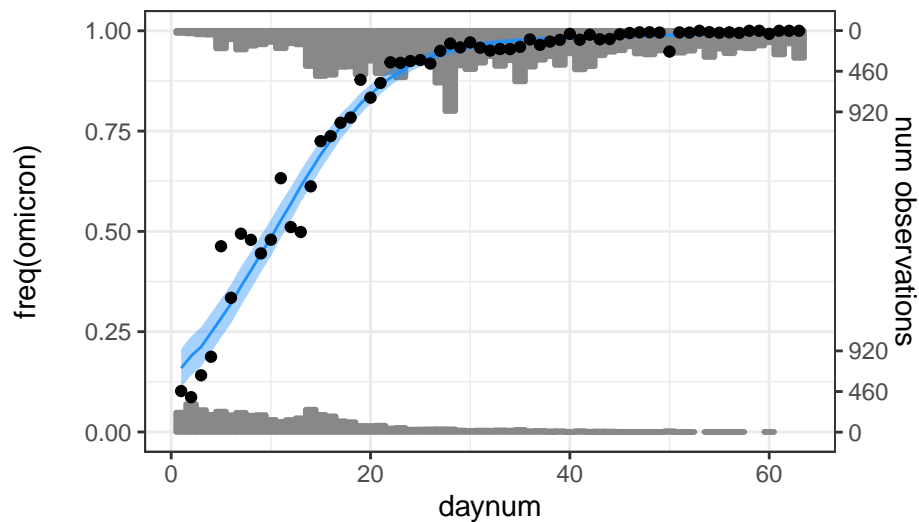

Australia  
weekly data, weekly predictions

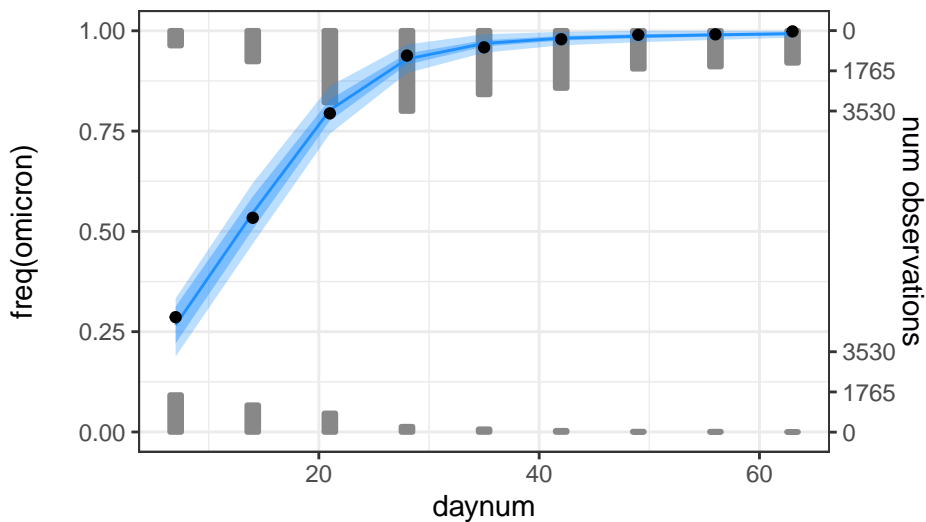

Australia  
daily predictions

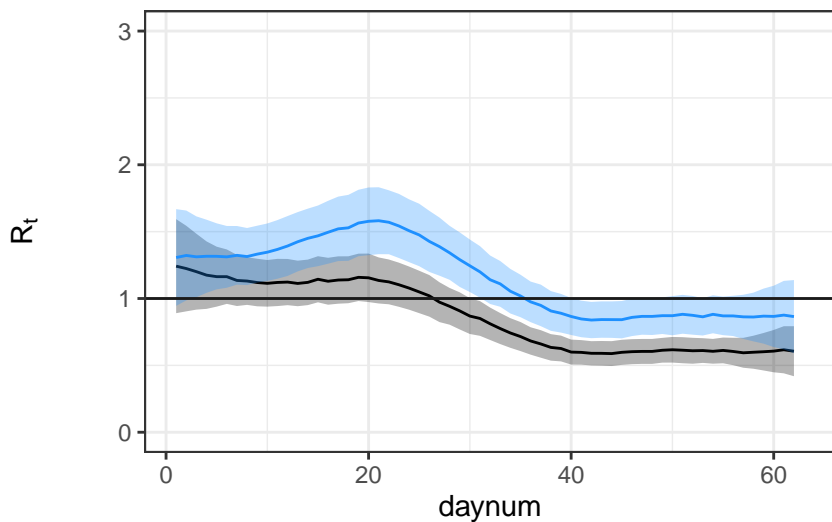

Austria  
daily data, daily predictions

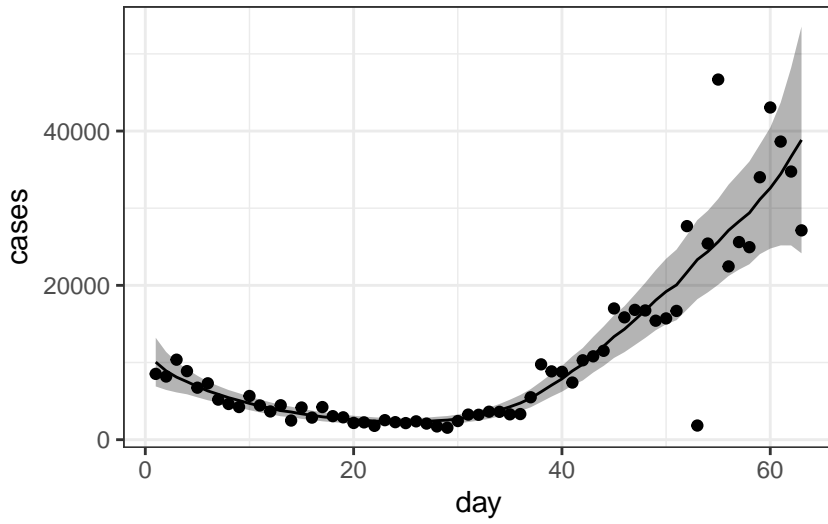

Austria  
weekly data, weekly predictions

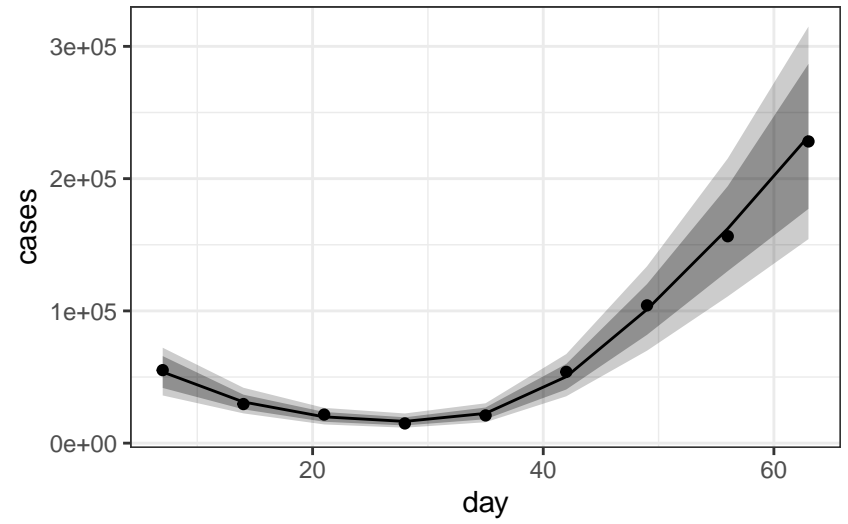

Austria  
daily data, daily predictions

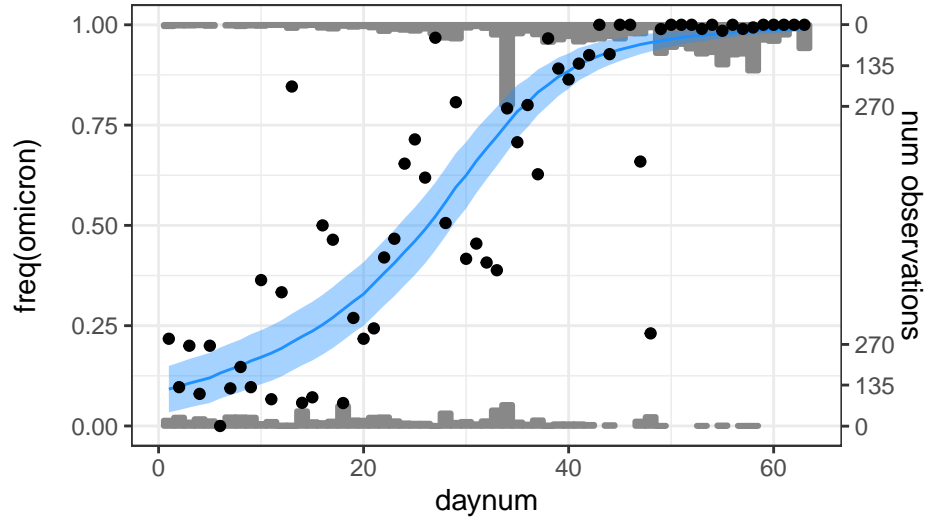

Austria  
weekly data, weekly predictions

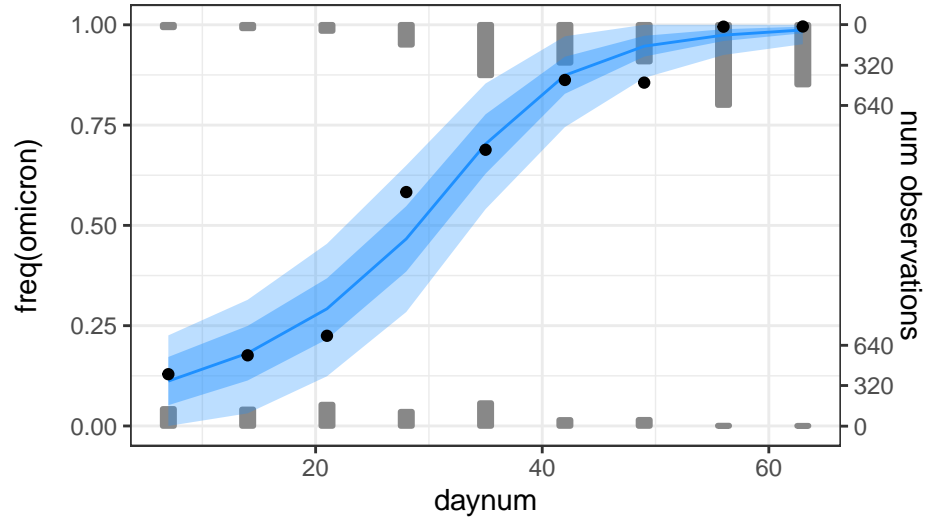

Austria  
daily predictions

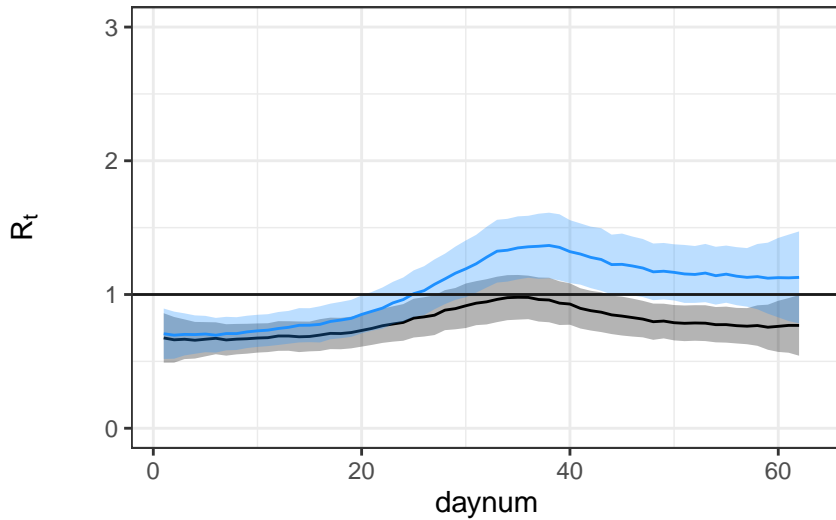

Belgium  
daily data, daily predictions

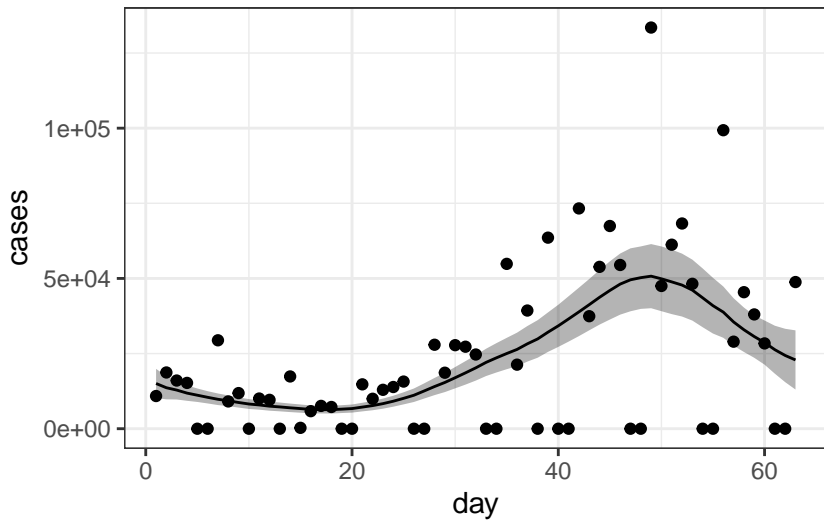

Belgium  
weekly data, weekly predictions

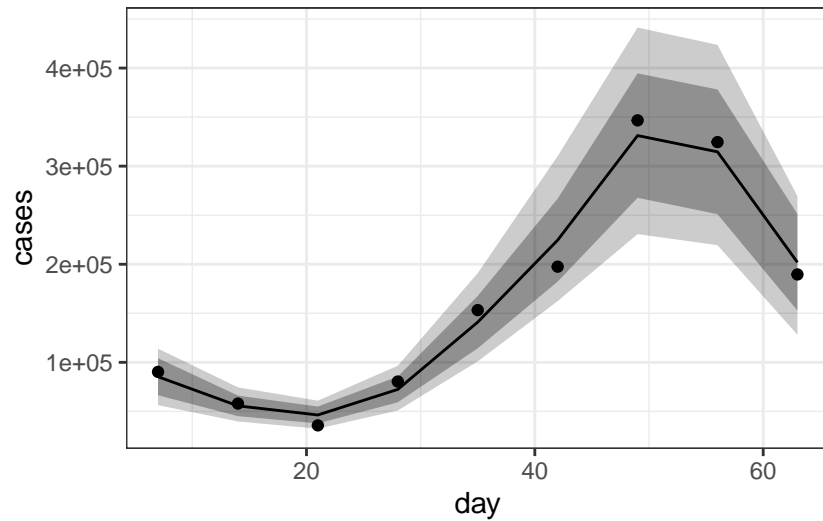

Belgium  
daily data, daily predictions

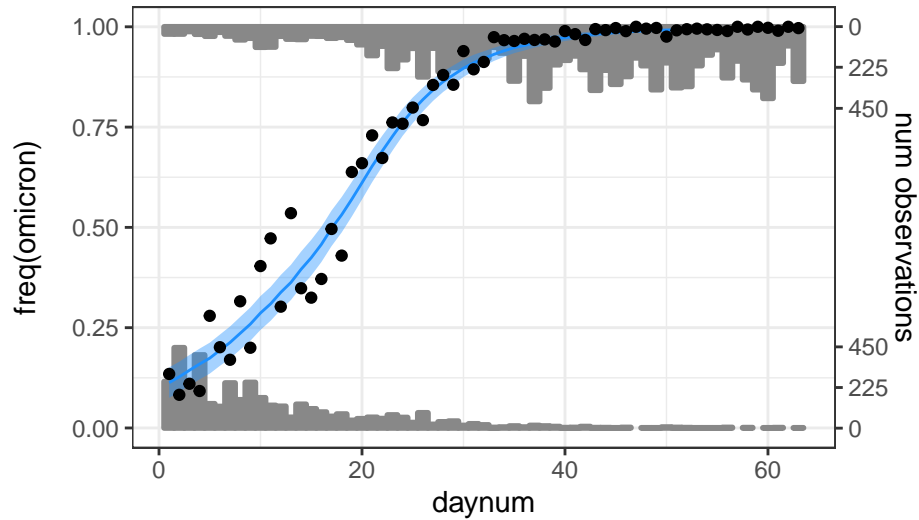

Belgium  
weekly data, weekly predictions

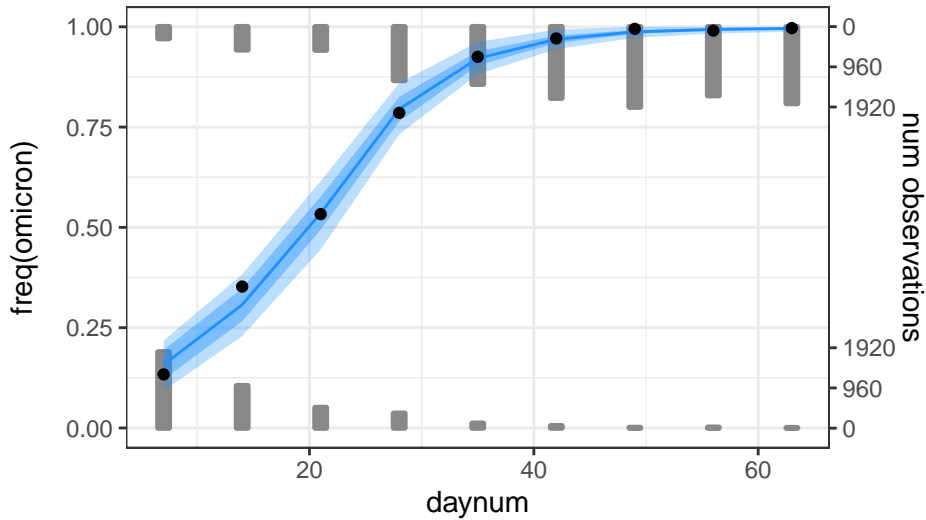

Belgium  
daily predictions

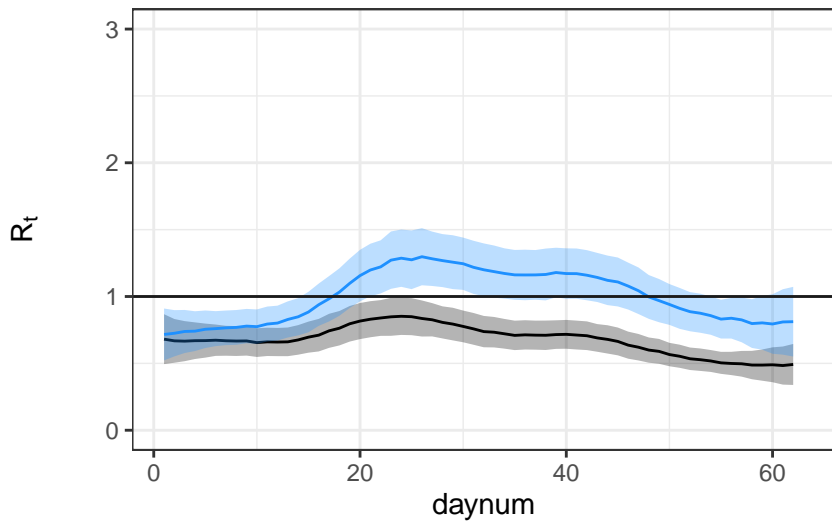

### Brazil

daily data, daily predictions

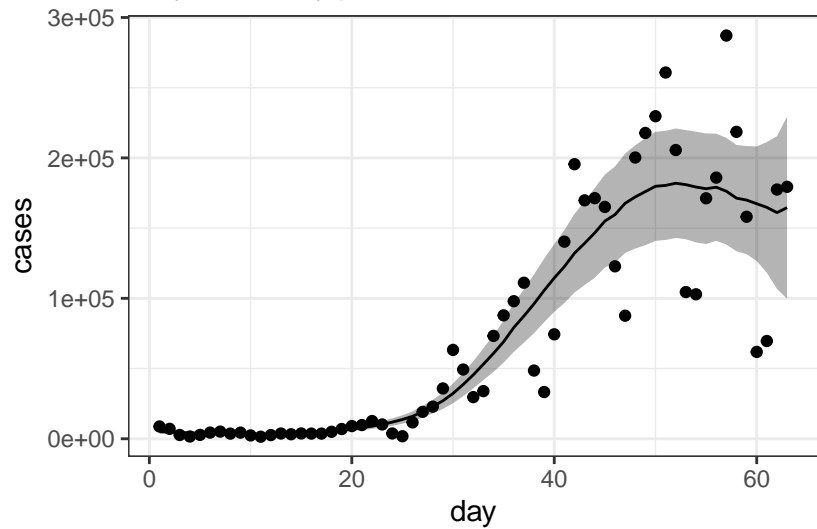

### Brazil

weekly data, weekly predictions

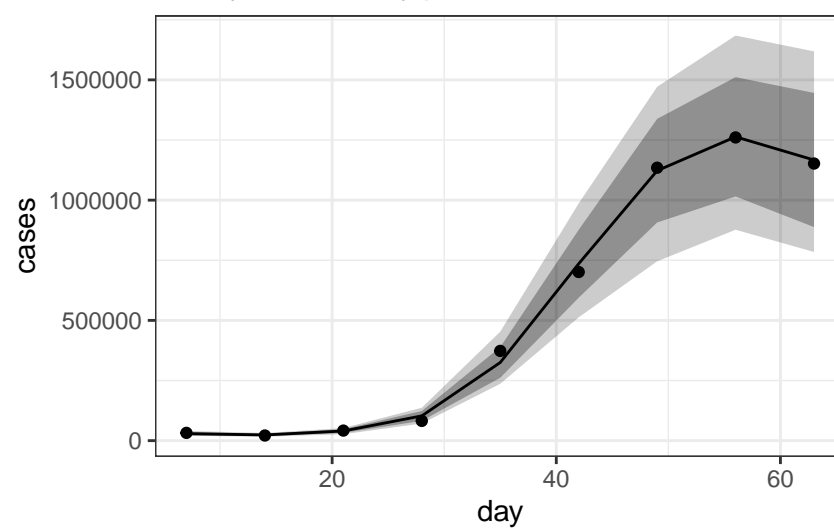

### Brazil

daily data, daily predictions

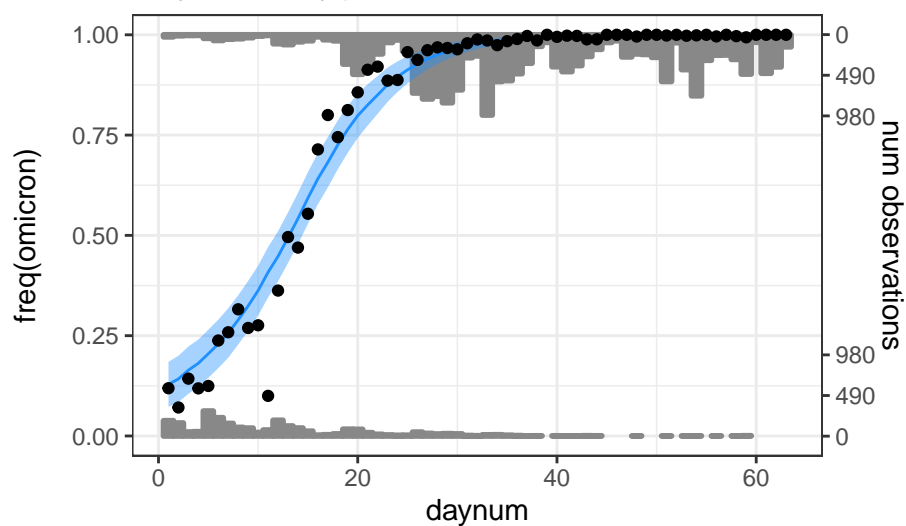

### Brazil

weekly data, weekly predictions

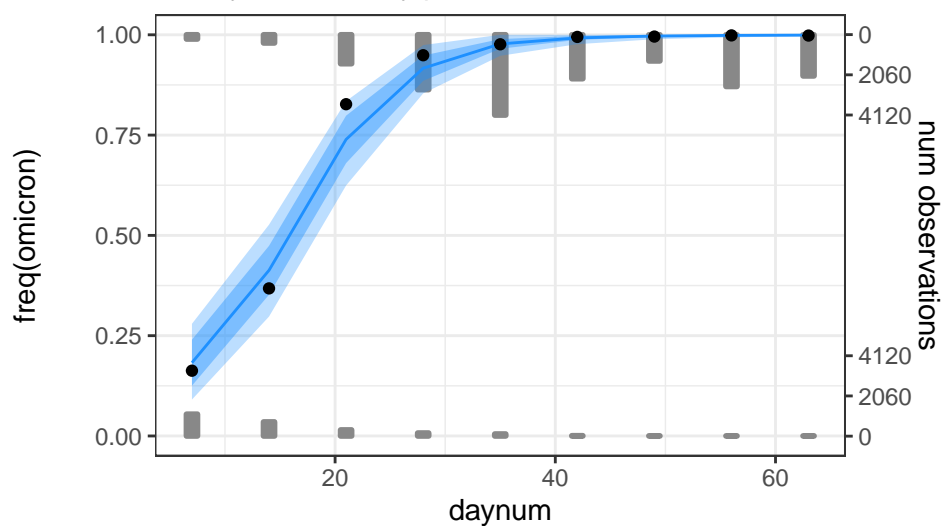

### Brazil

daily predictions

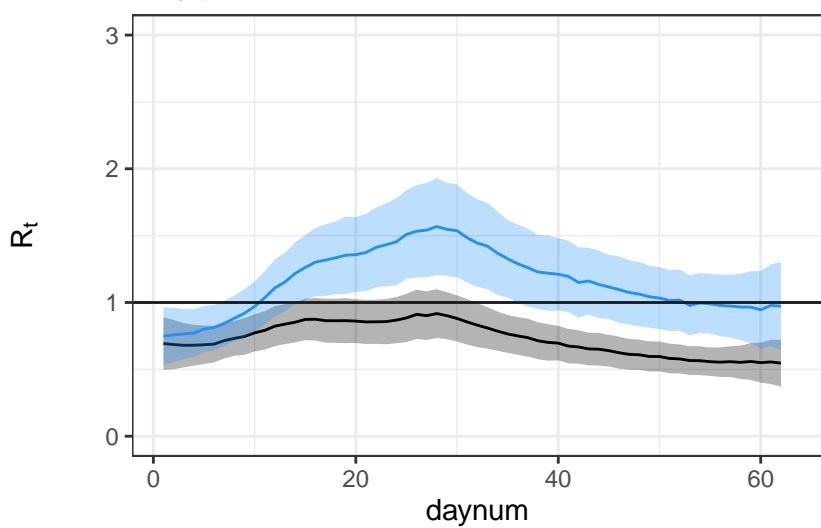

Canada  
daily data, daily predictions

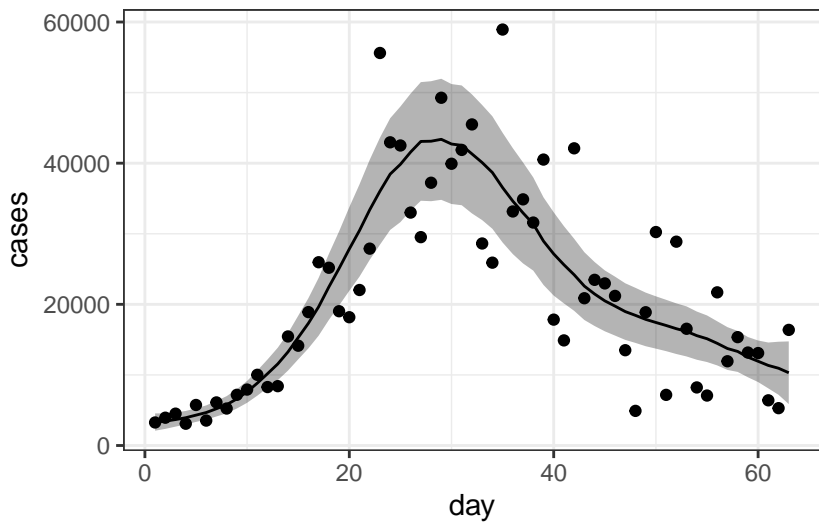

Canada  
weekly data, weekly predictions

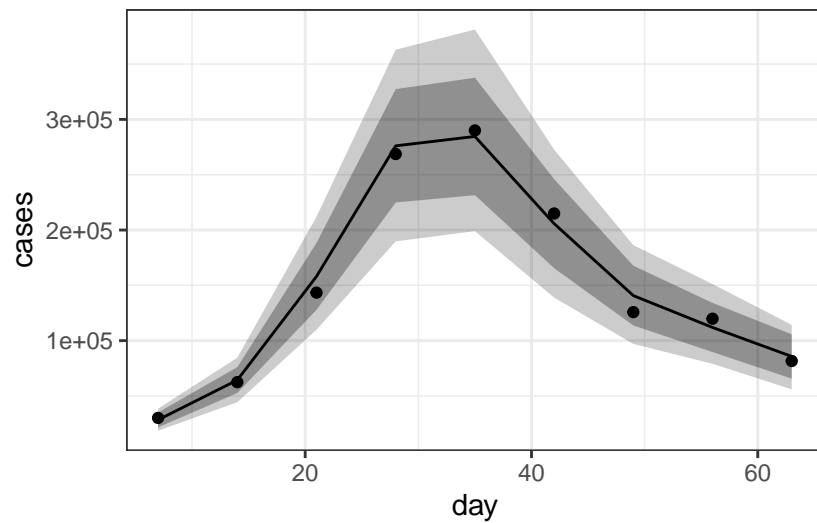

Canada  
daily data, daily predictions

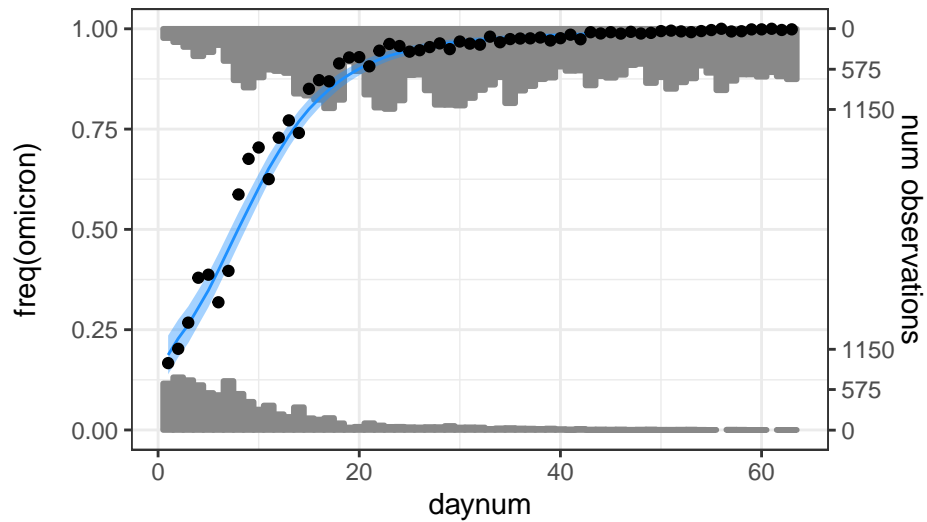

Canada  
weekly data, weekly predictions

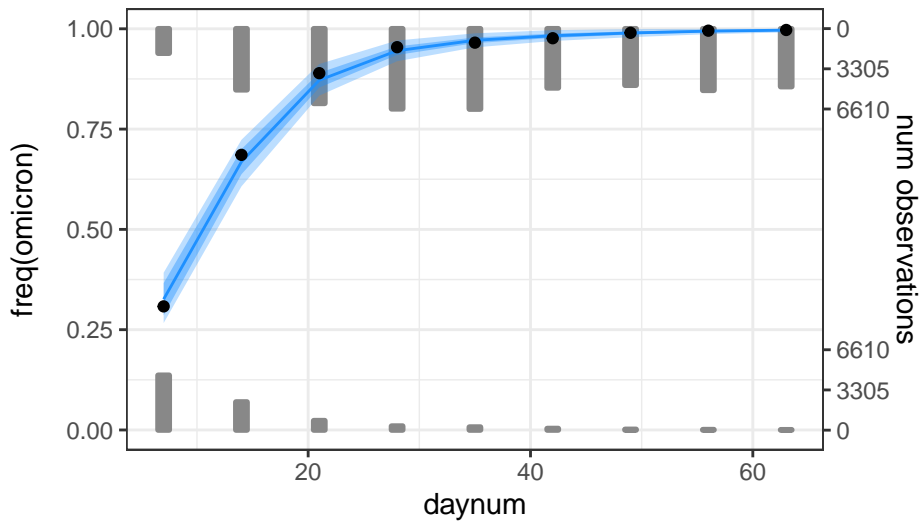

Canada  
daily predictions

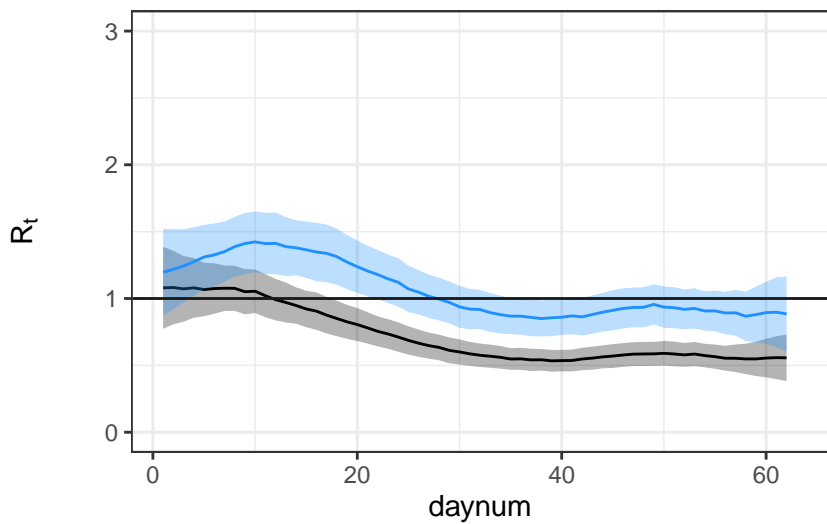

Chile  
daily data, daily predictions

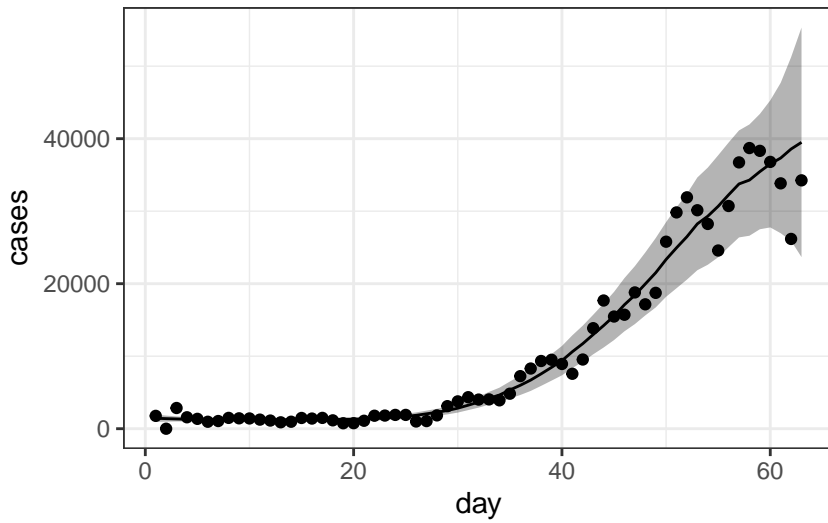

Chile  
weekly data, weekly predictions

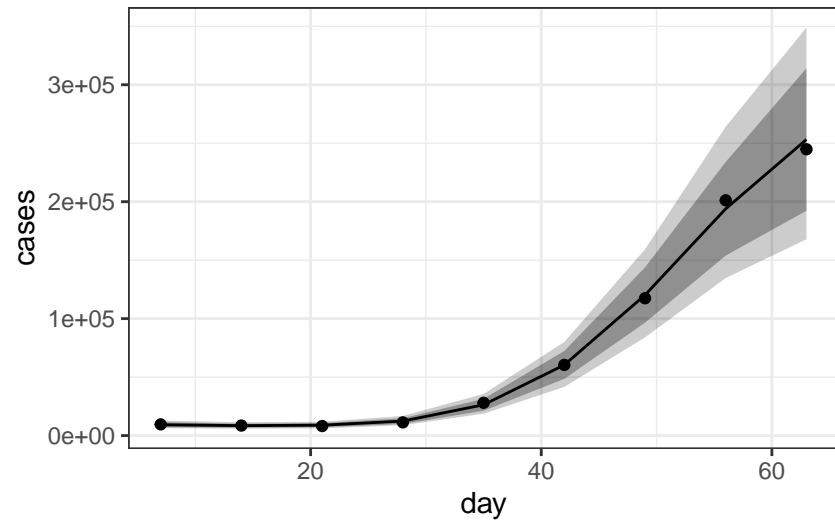

Chile  
daily data, daily predictions

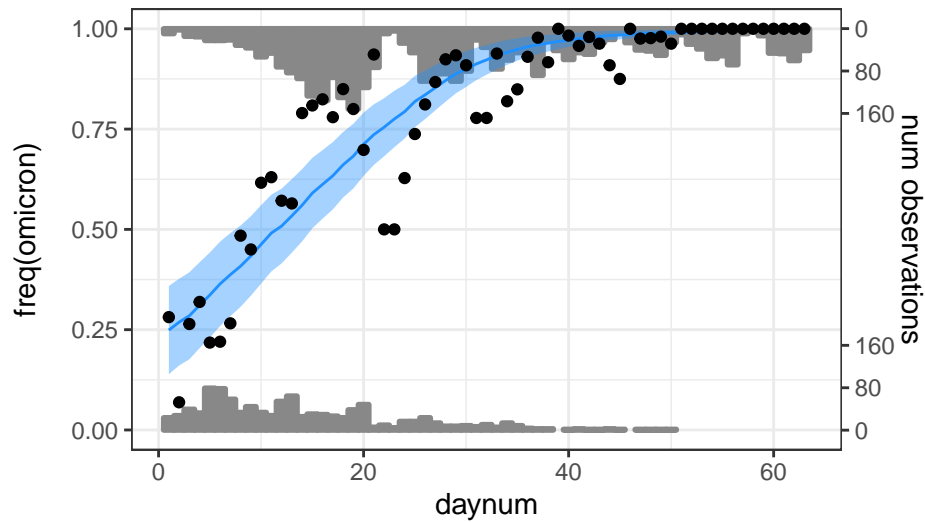

Chile  
weekly data, weekly predictions

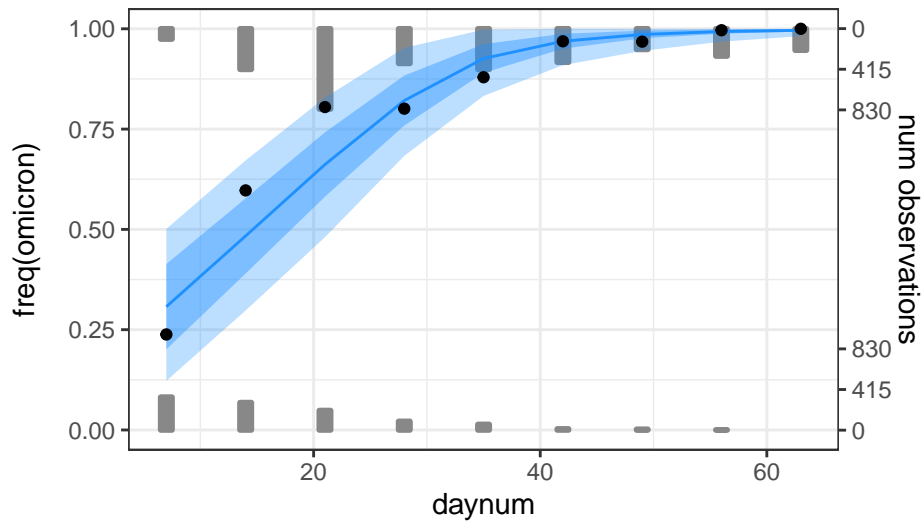

Chile  
daily predictions

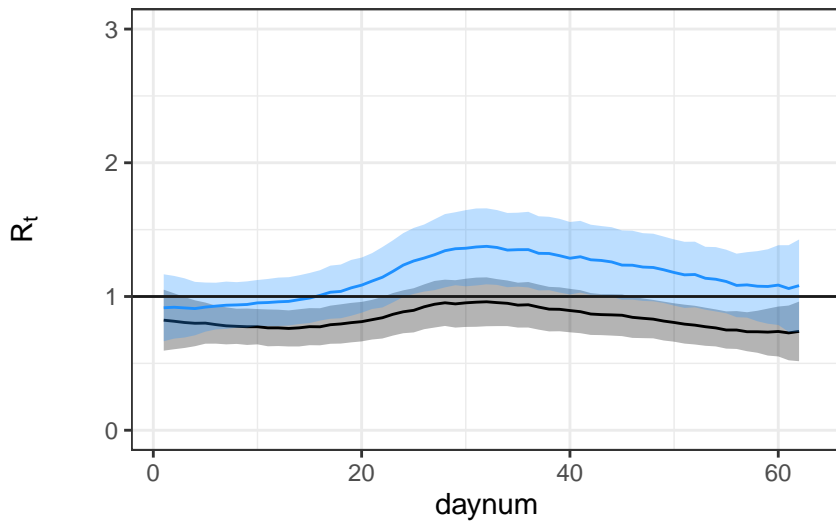

### Croatia

daily data, daily predictions

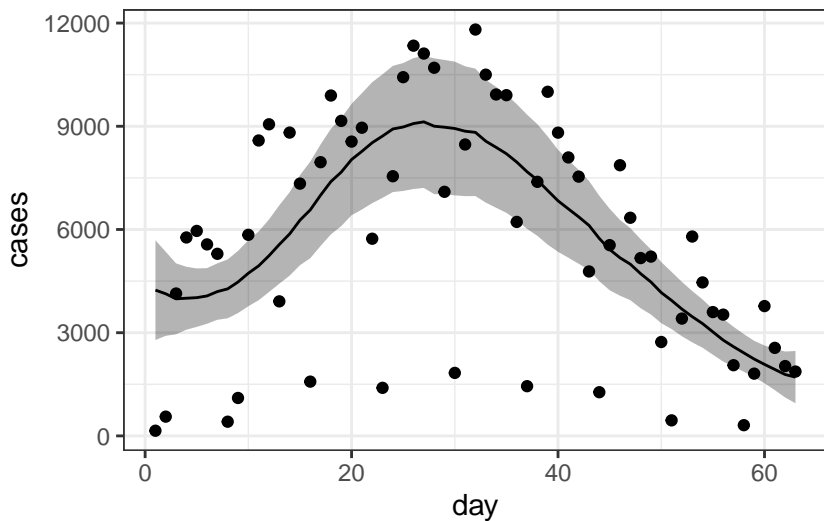

### Croatia

weekly data, weekly predictions

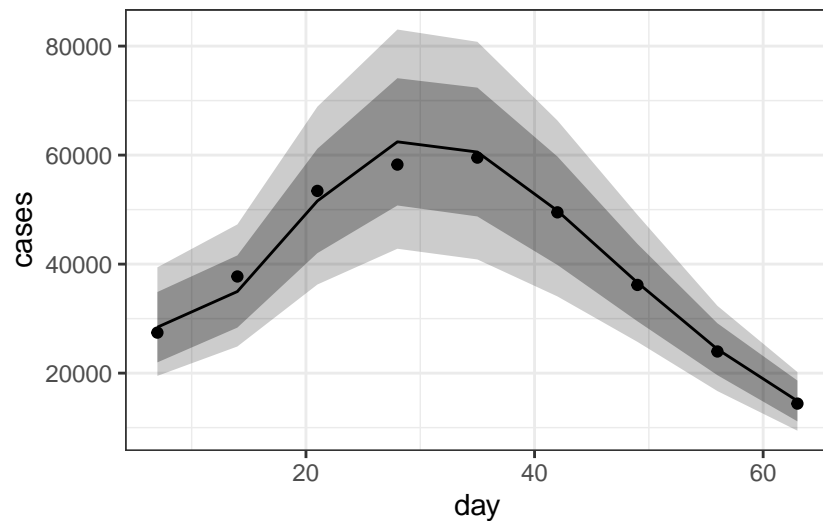

### Croatia

daily data, daily predictions

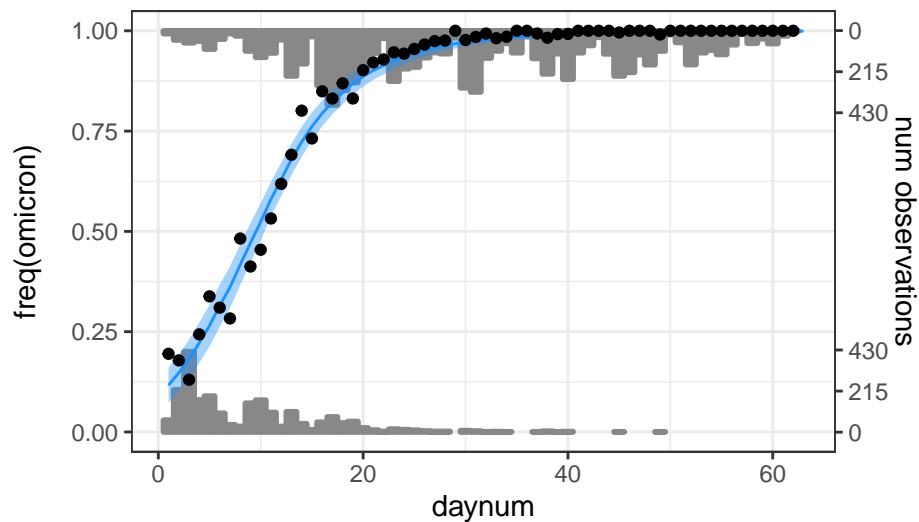

### Croatia

weekly data, weekly predictions

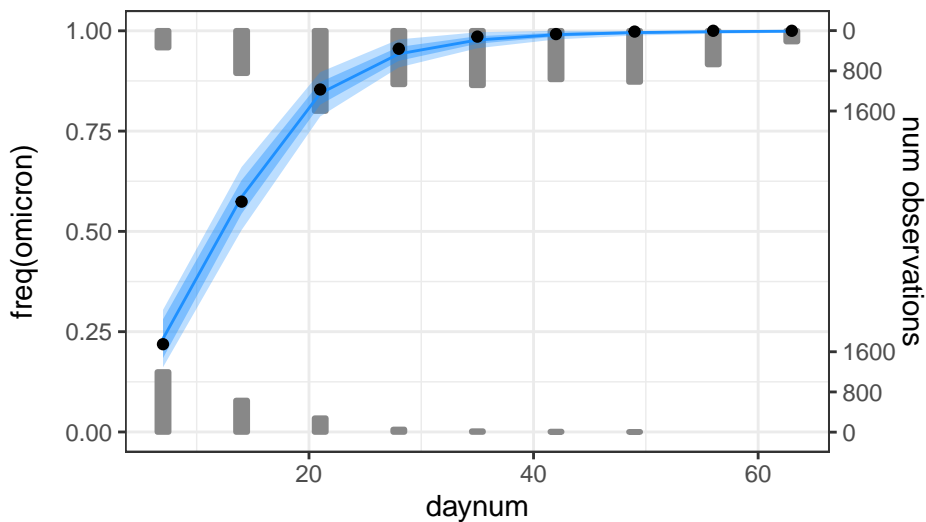

### Croatia

daily predictions

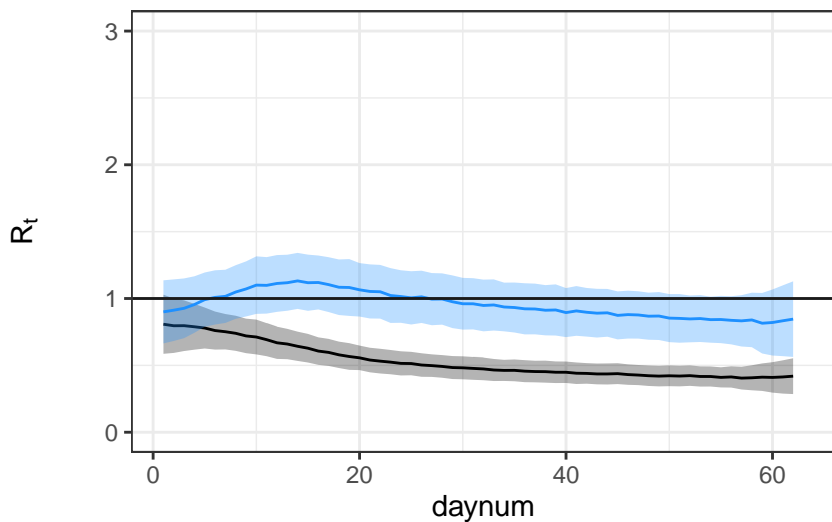



### Czechia

daily data, daily predictions

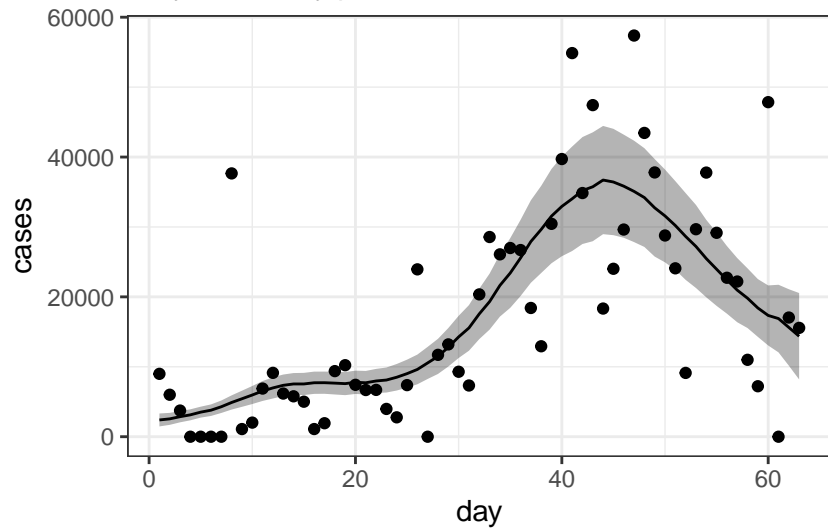

### Czechia

weekly data, weekly predictions

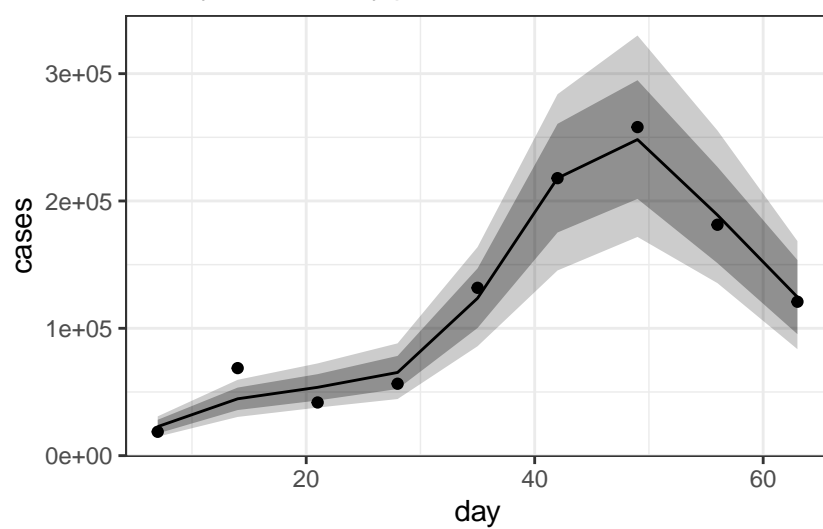

### Czechia

daily data, daily predictions

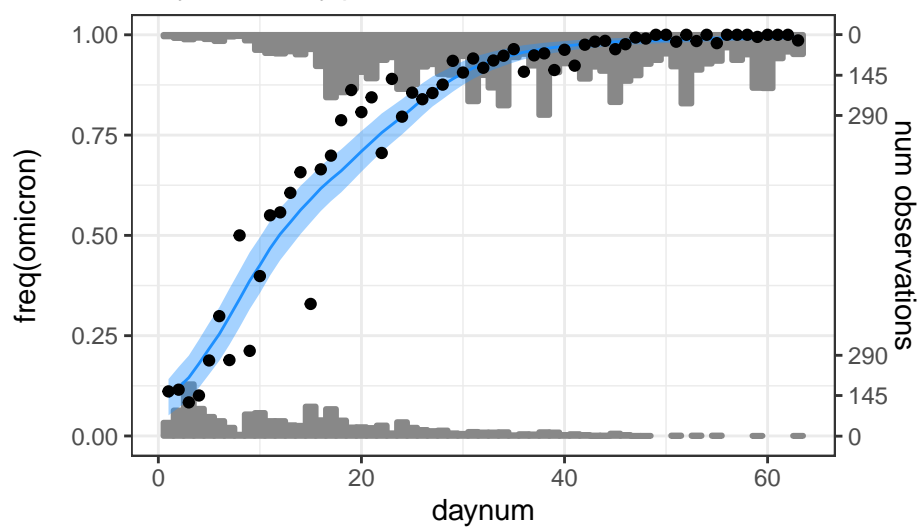

### Czechia

weekly data, weekly predictions

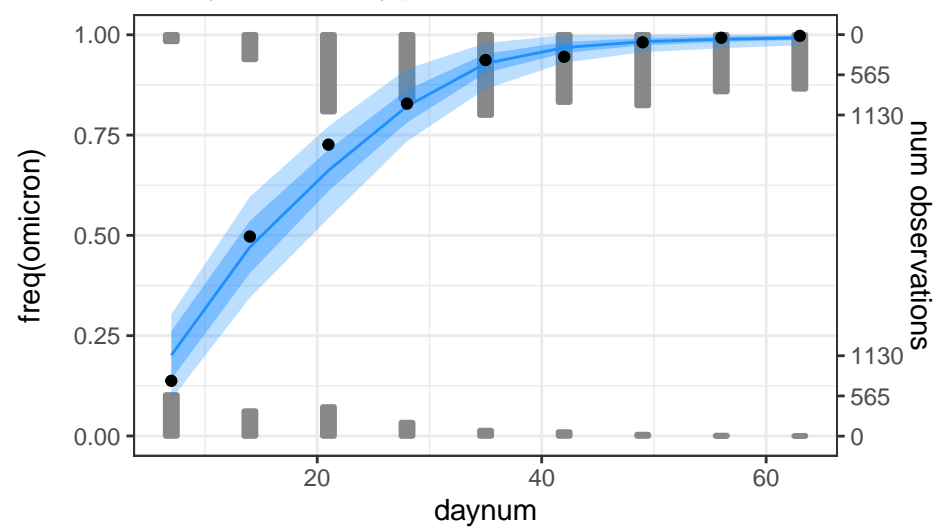

### Czechia

daily predictions

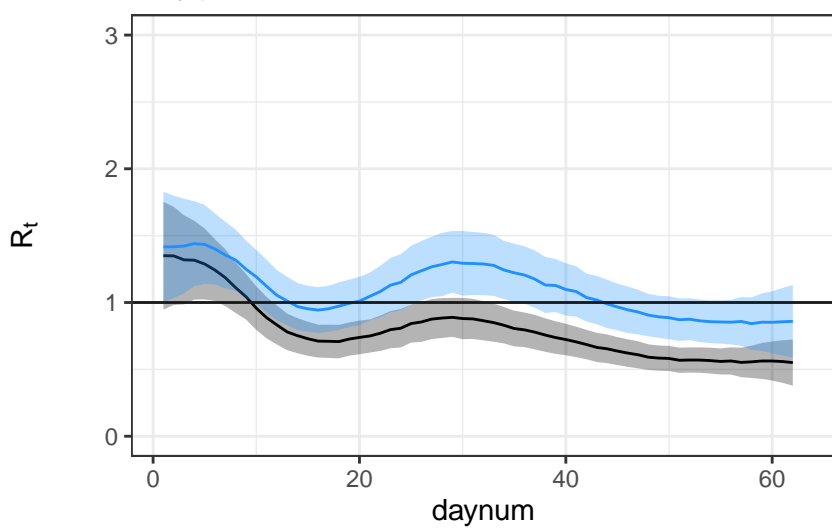

Denmark  
daily data, daily predictions

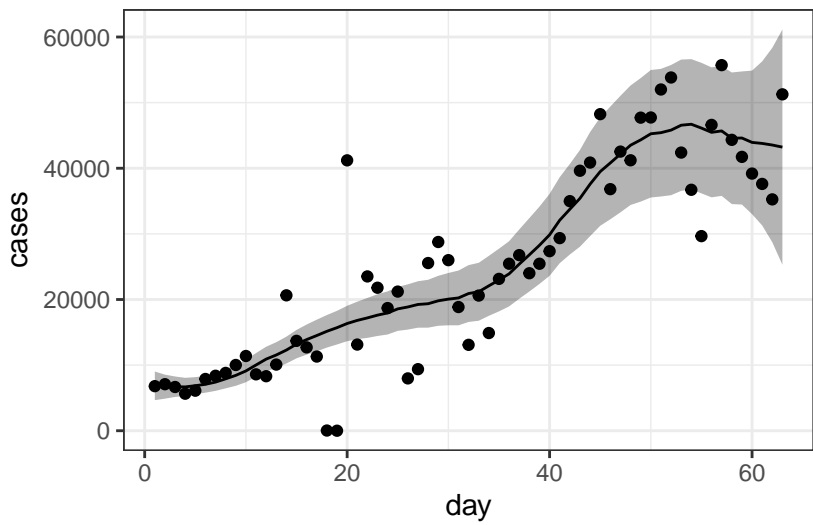

Denmark  
weekly data, weekly predictions

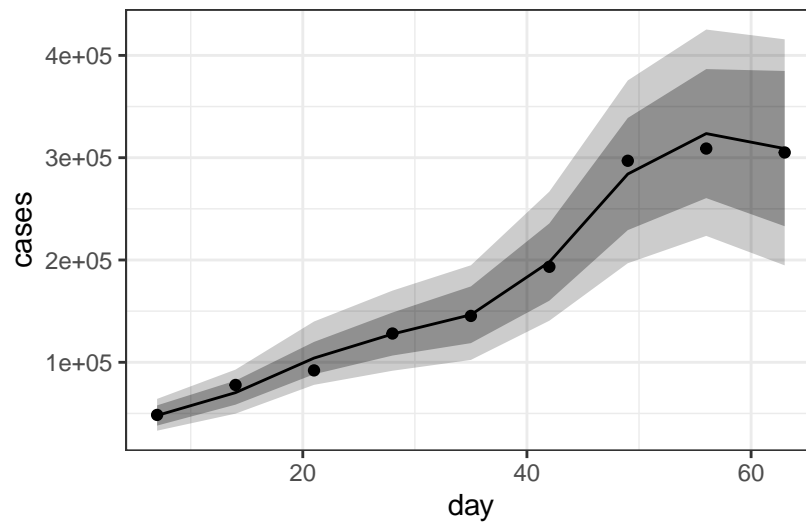

Denmark  
daily data, daily predictions

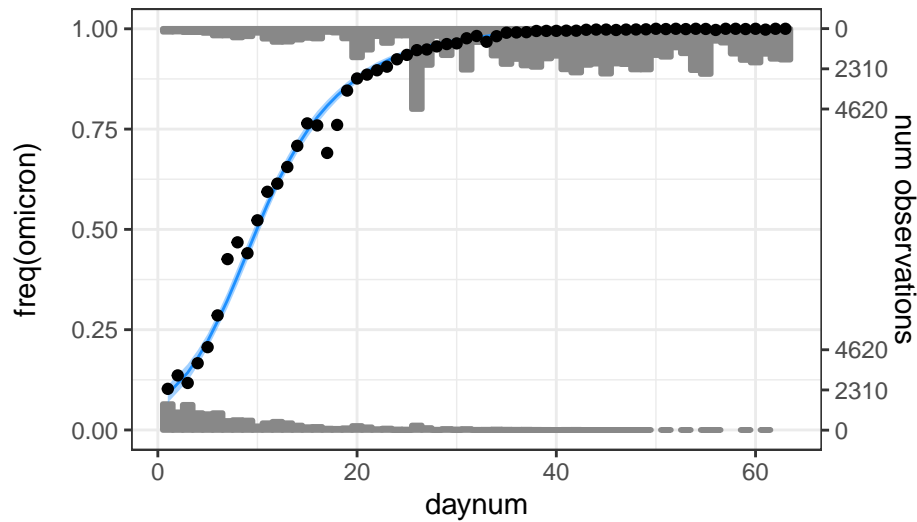

Denmark  
weekly data, weekly predictions

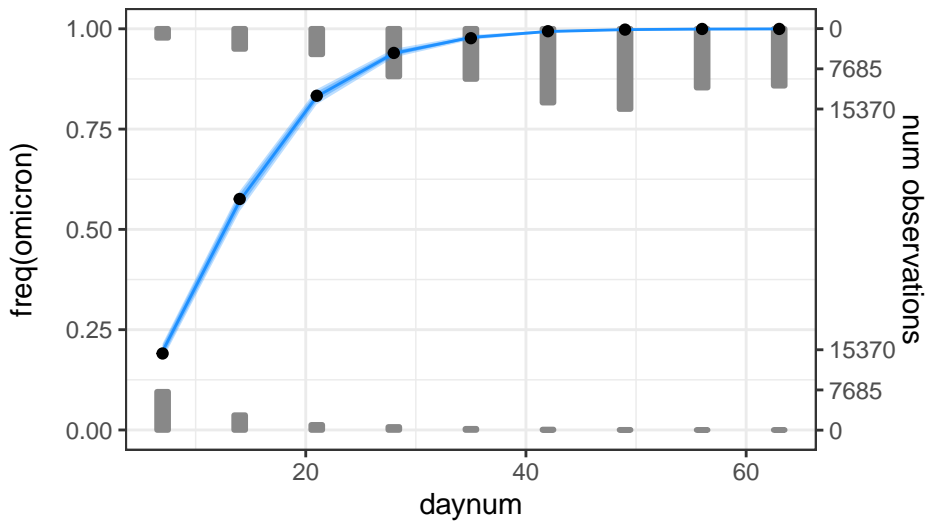

Denmark  
daily predictions

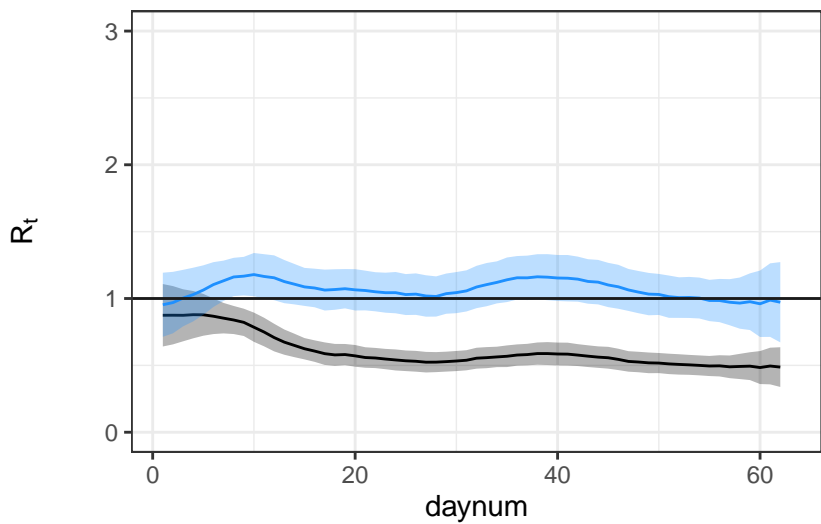

### Finland

daily data, daily predictions

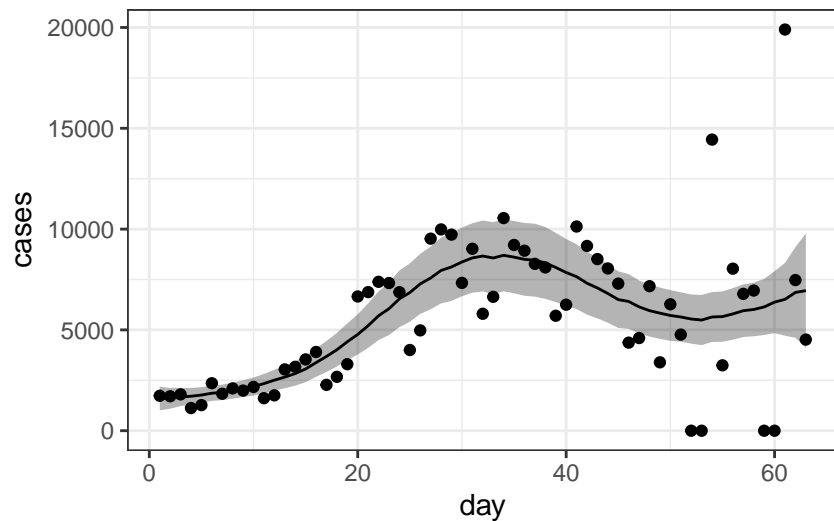

### Finland

weekly data, weekly predictions

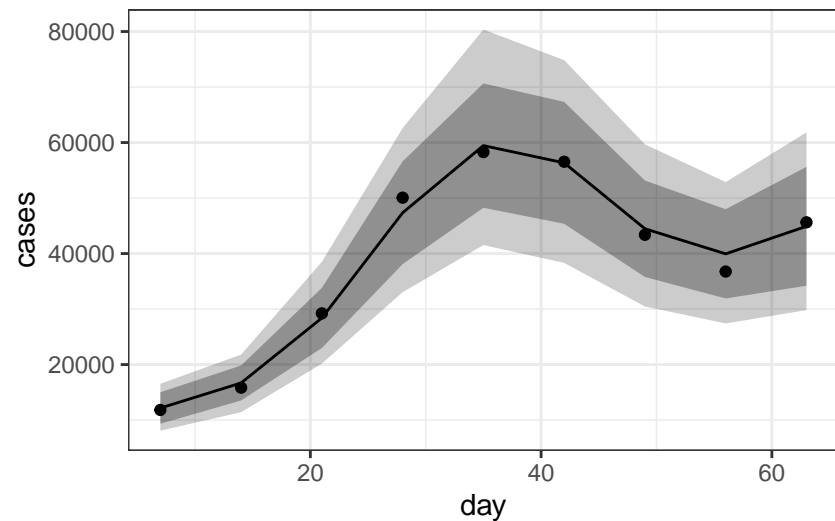

### Finland

daily data, daily predictions

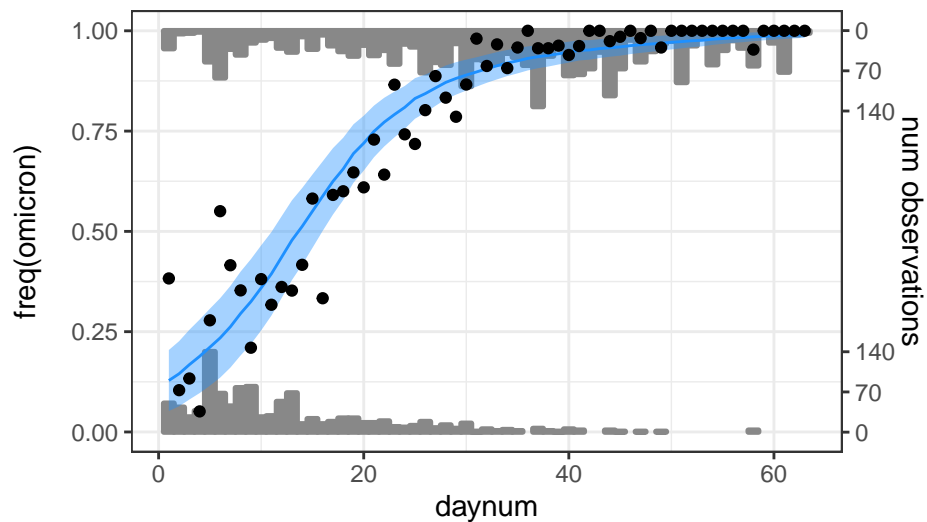

### Finland

weekly data, weekly predictions

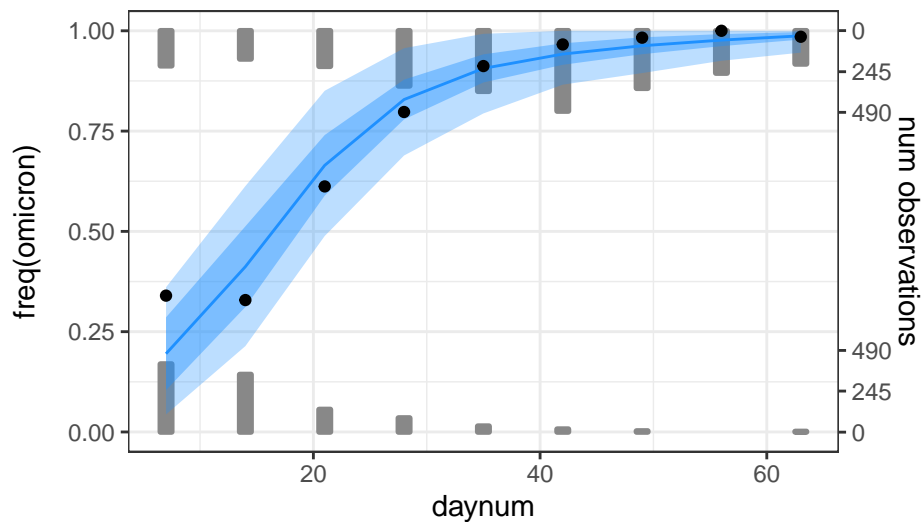

### Finland

daily predictions

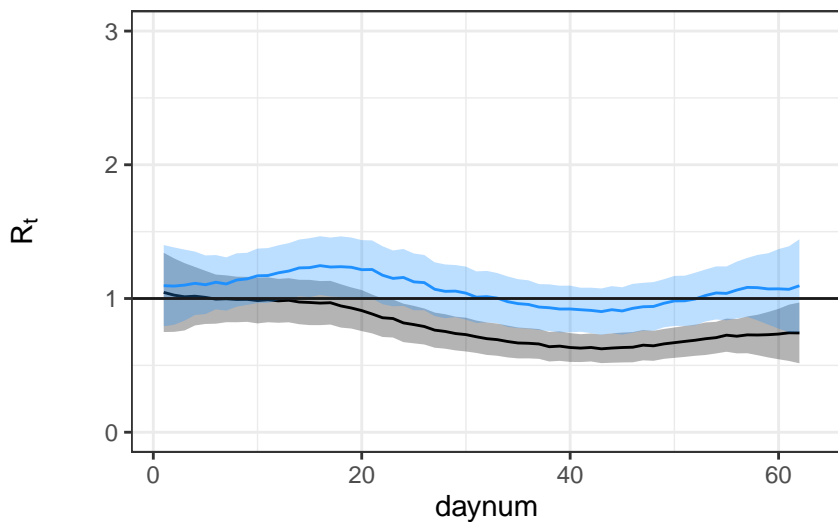

### France

daily data, daily predictions

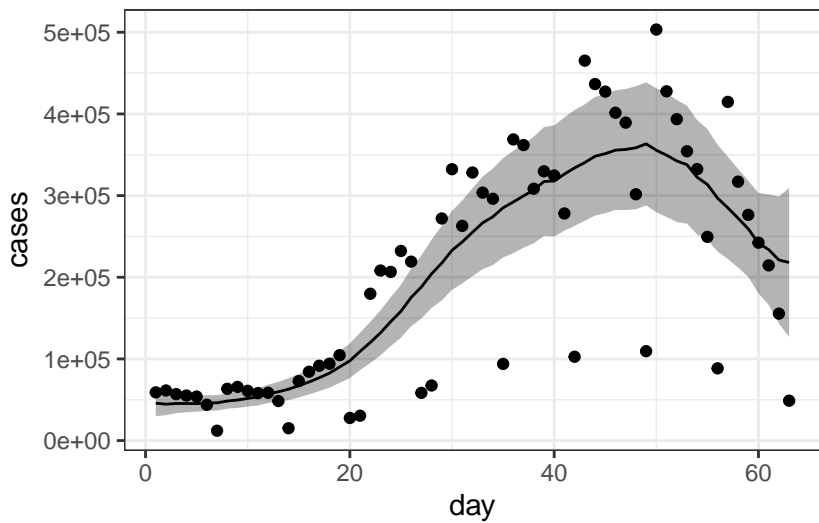

### France

weekly data, weekly predictions

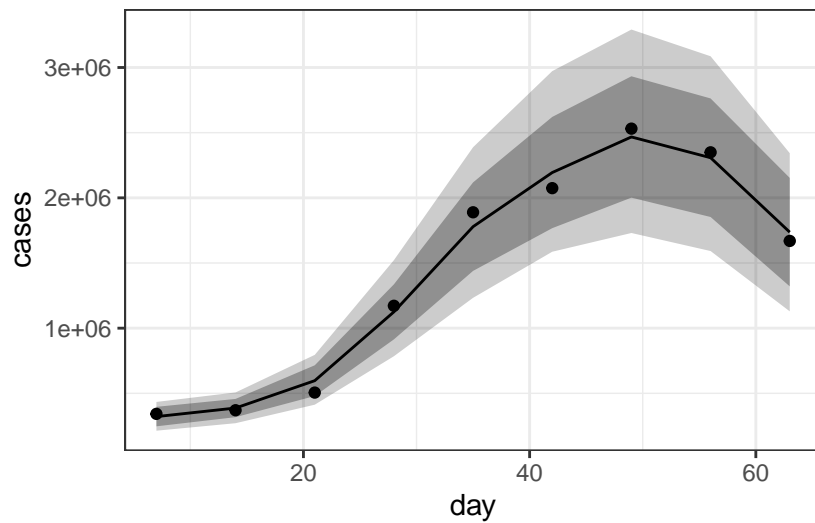

### France

daily data, daily predictions

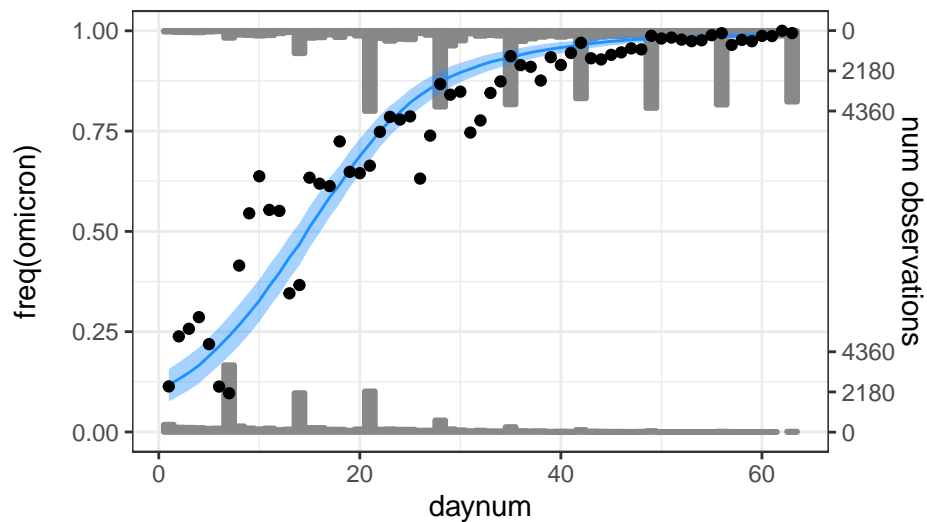

### France

weekly data, weekly predictions

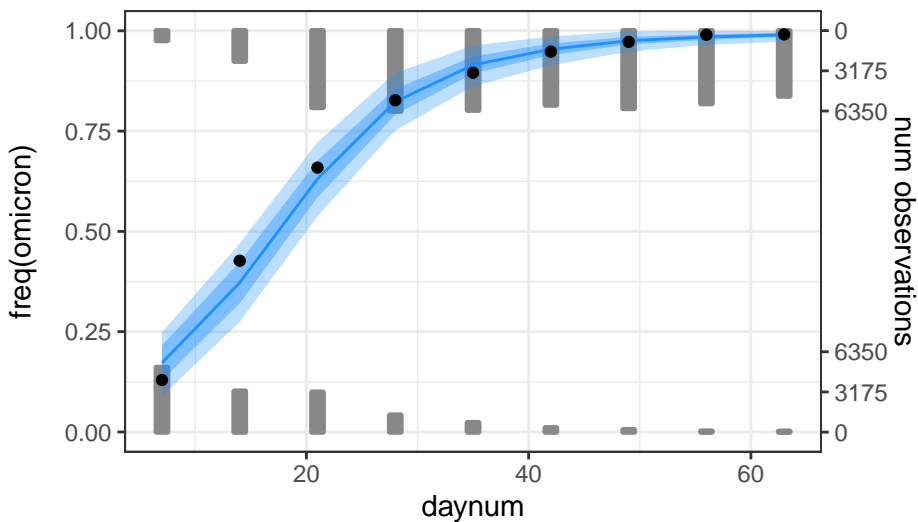

### France

daily predictions

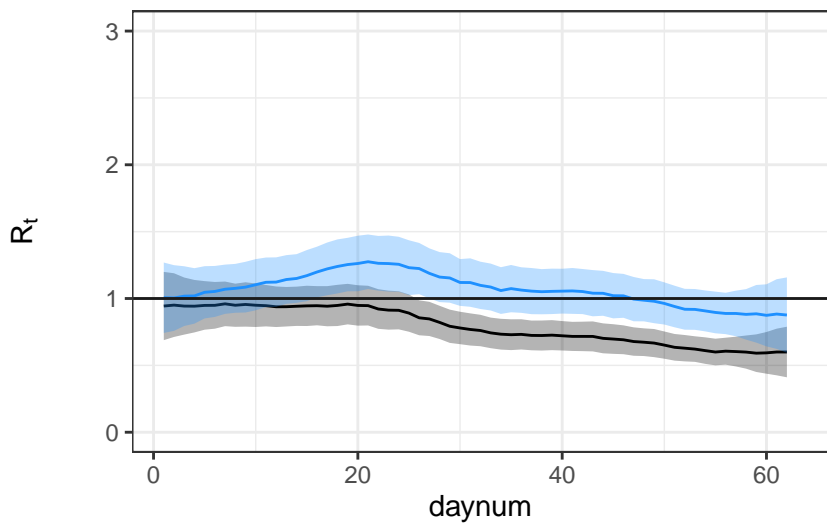

### Germany

daily data, daily predictions

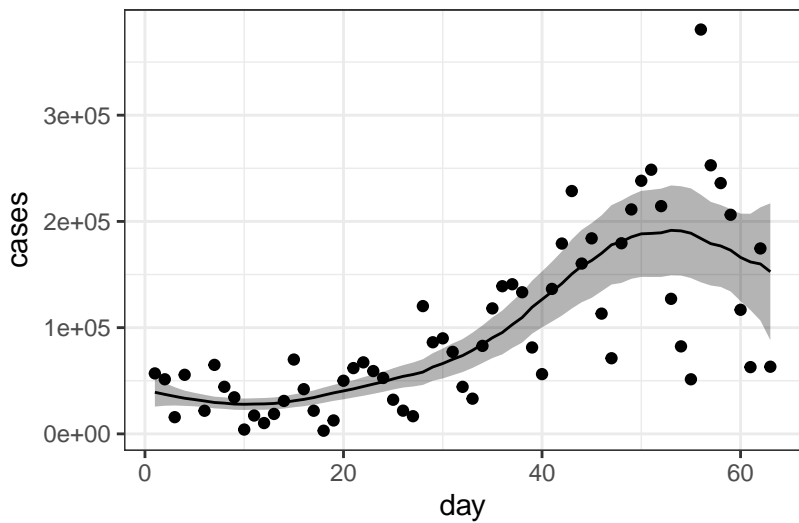

### Germany

weekly data, weekly predictions

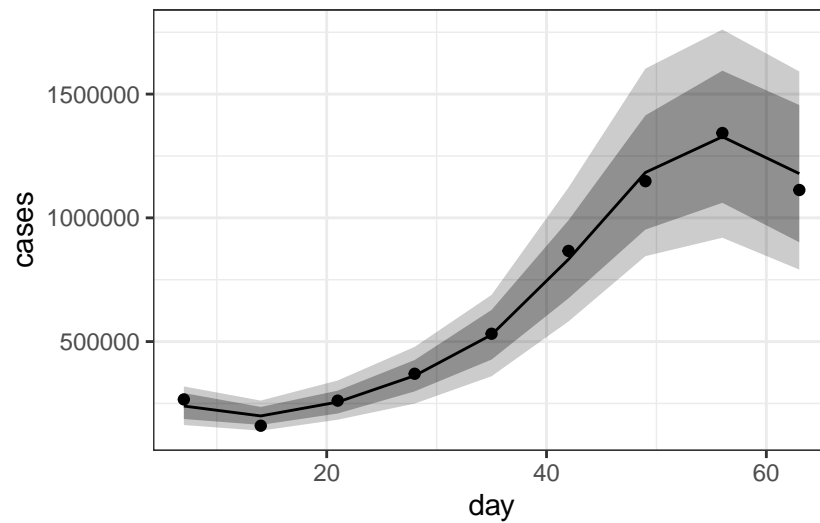

### Germany

daily data, daily predictions

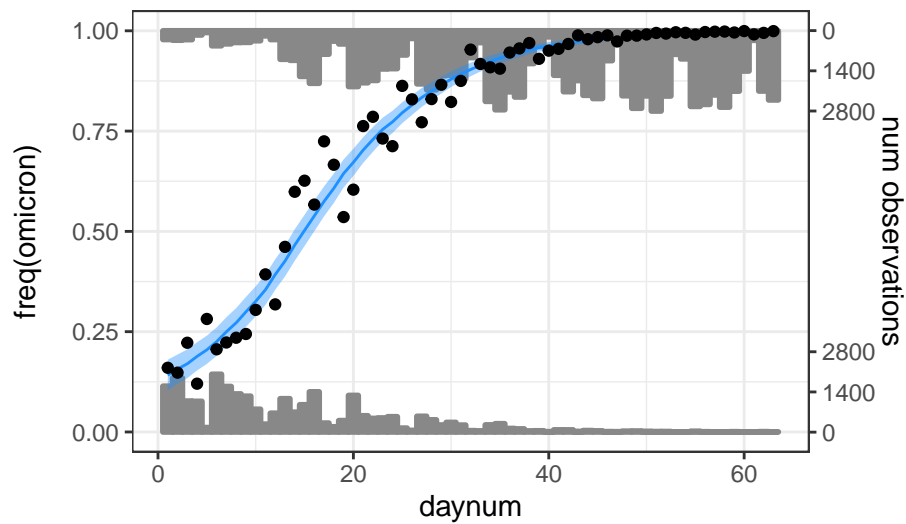

### Germany

weekly data, weekly predictions

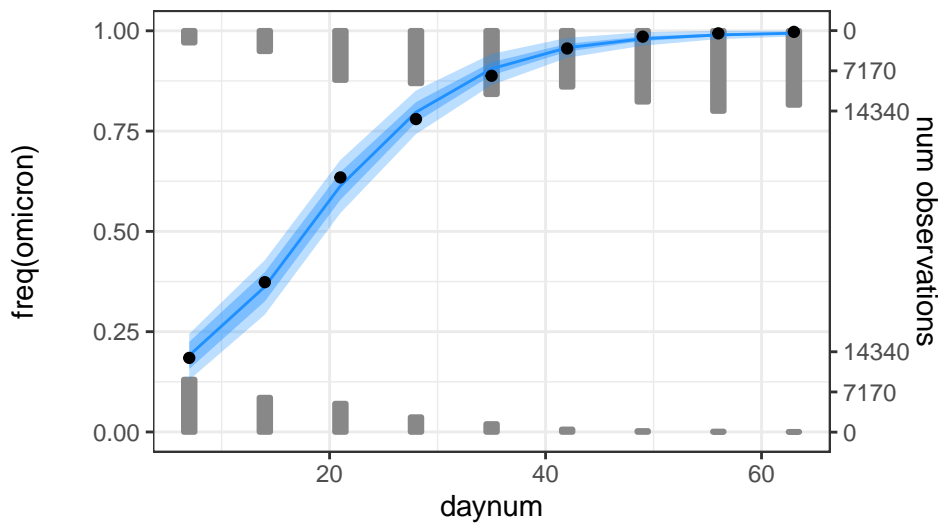

### Germany

daily predictions

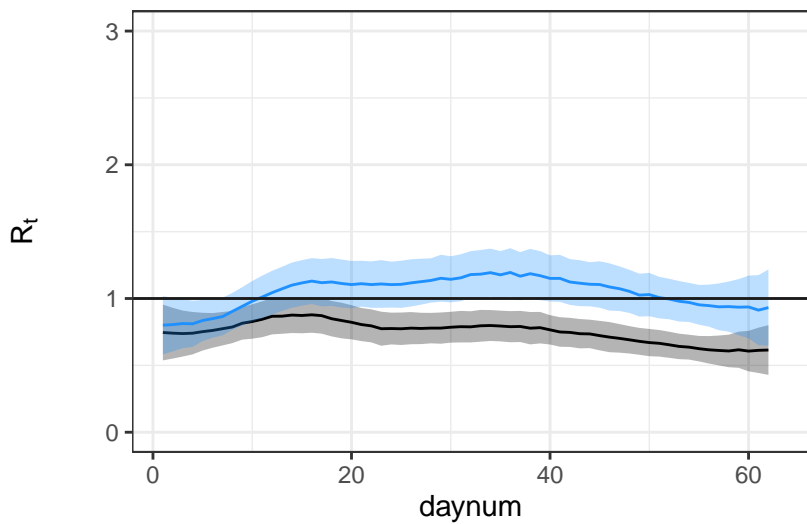

### India

daily data, daily predictions

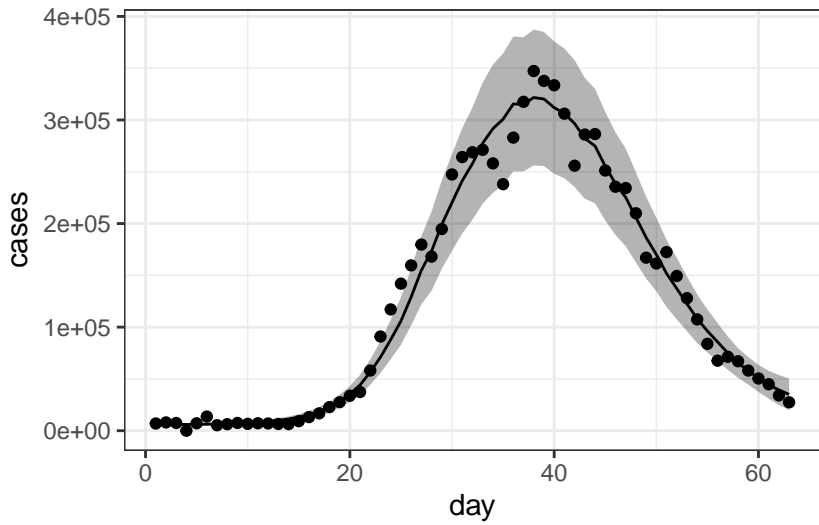

### India

weekly data, weekly predictions

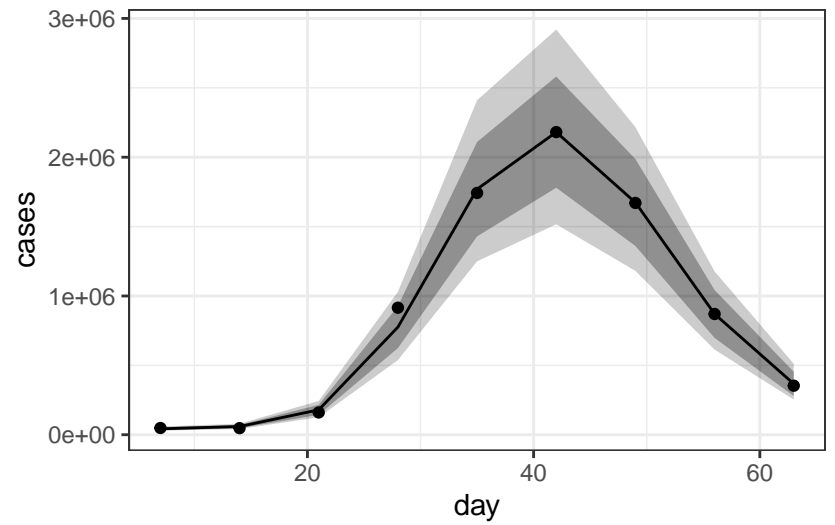

### India

daily data, daily predictions

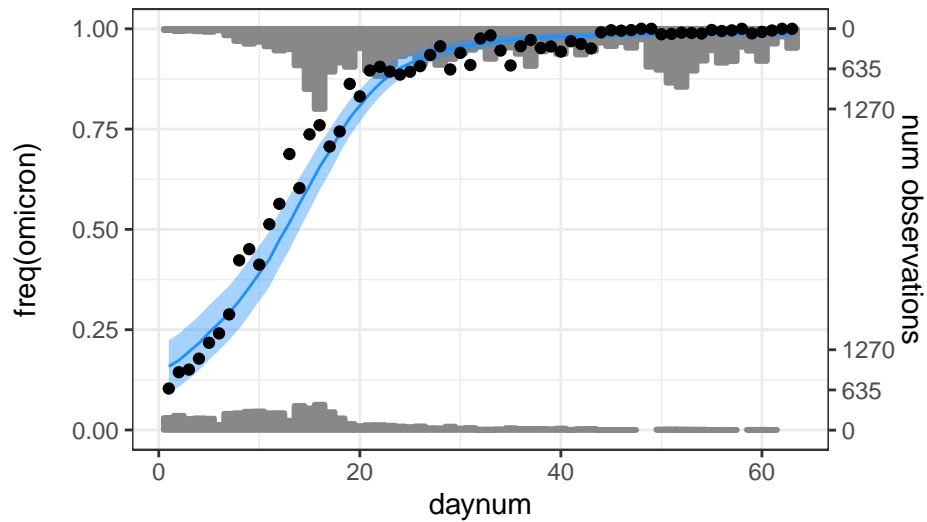

### India

weekly data, weekly predictions

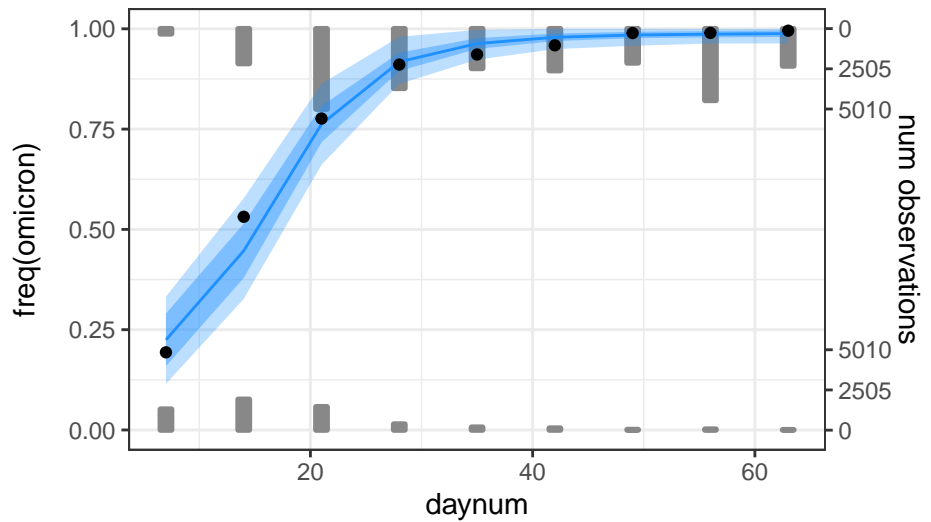

### India

daily predictions

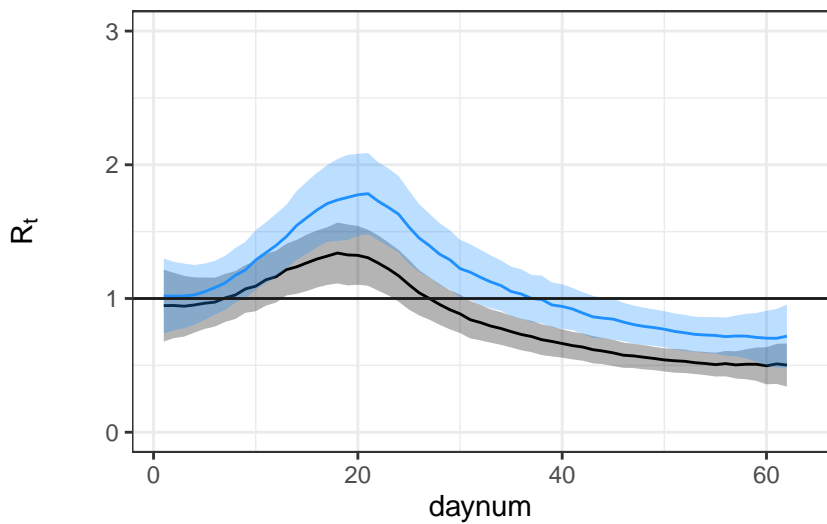

### Indonesia

daily data, daily predictions

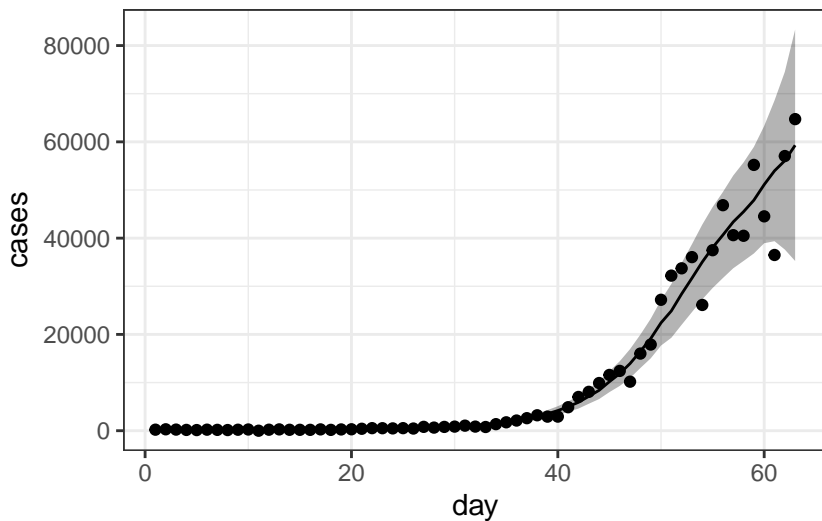

### Indonesia

weekly data, weekly predictions

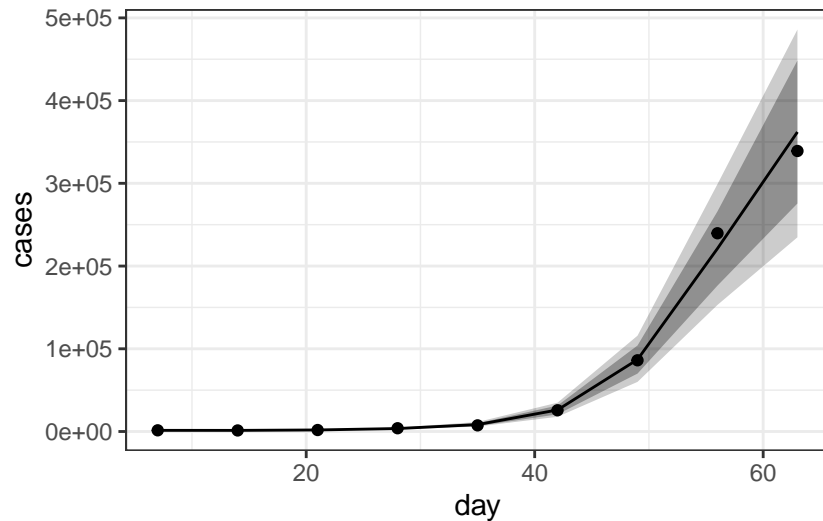

### Indonesia

daily data, daily predictions

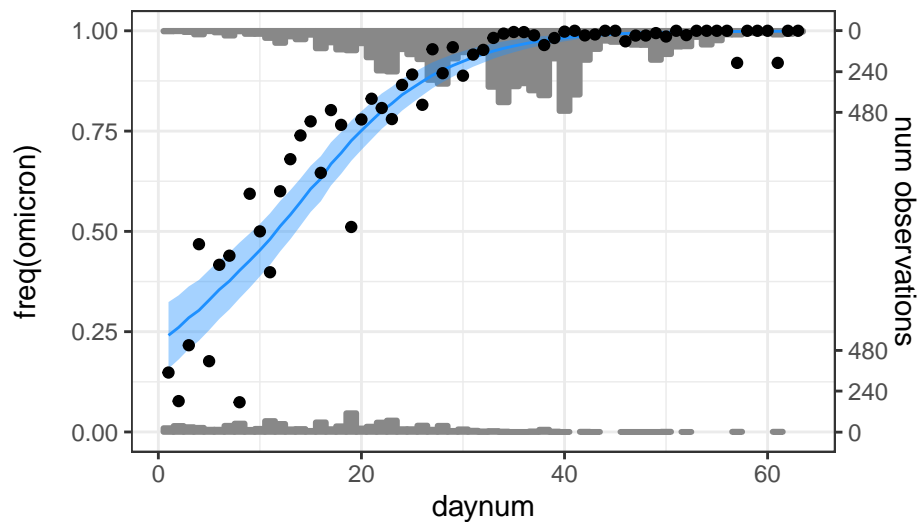

### Indonesia

weekly data, weekly predictions

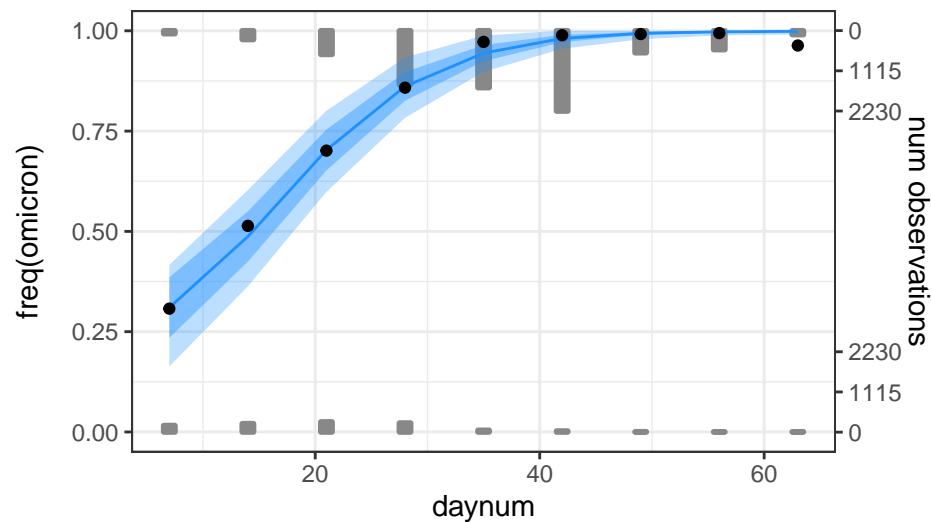

### Indonesia

daily predictions

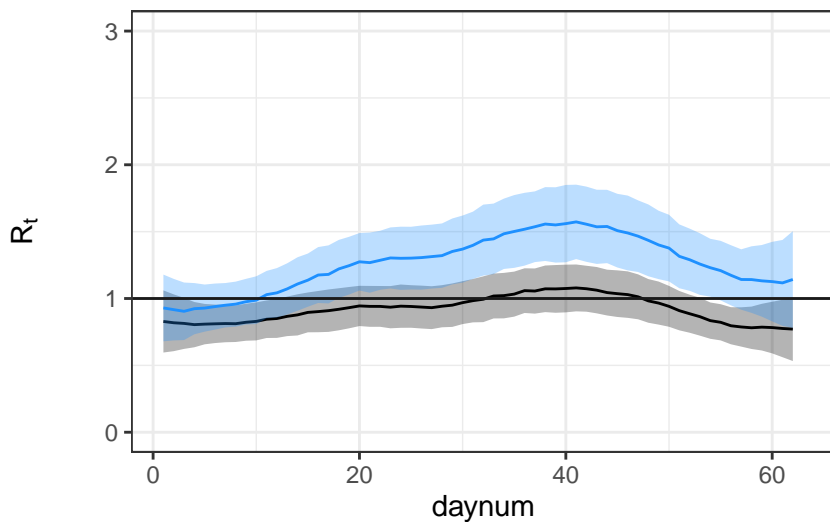

Ireland  
daily data, daily predictions

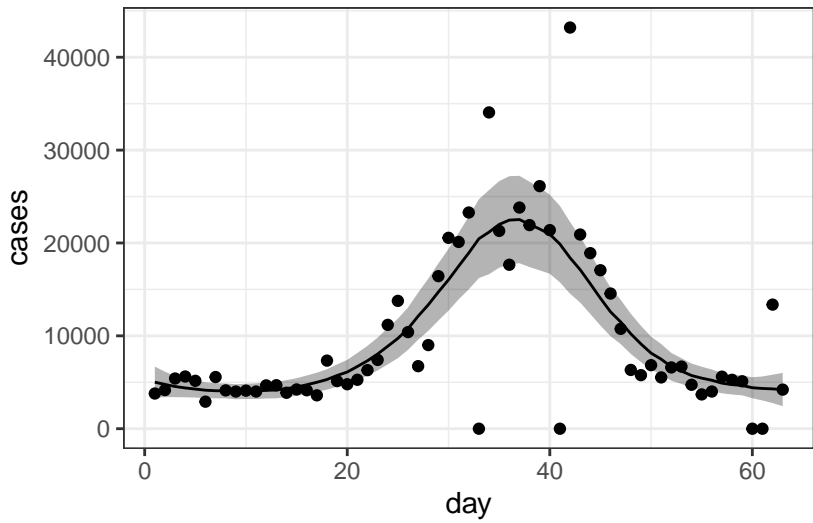

Ireland  
weekly data, weekly predictions

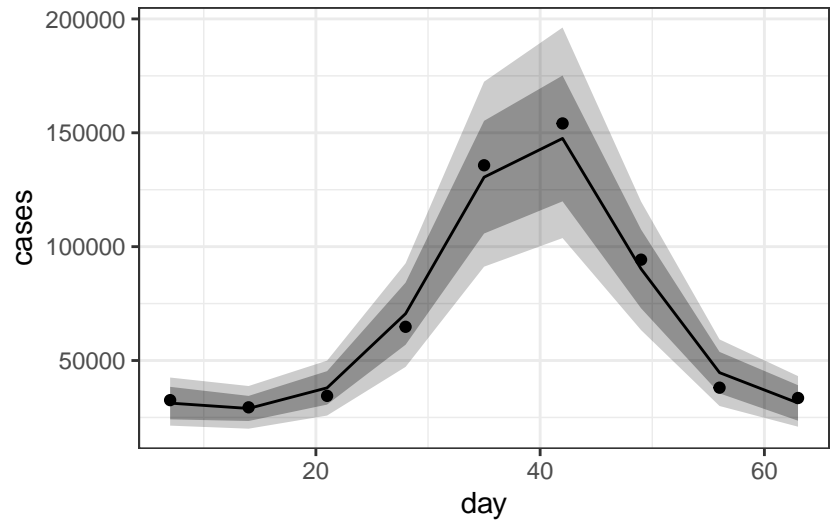

Ireland  
daily data, daily predictions

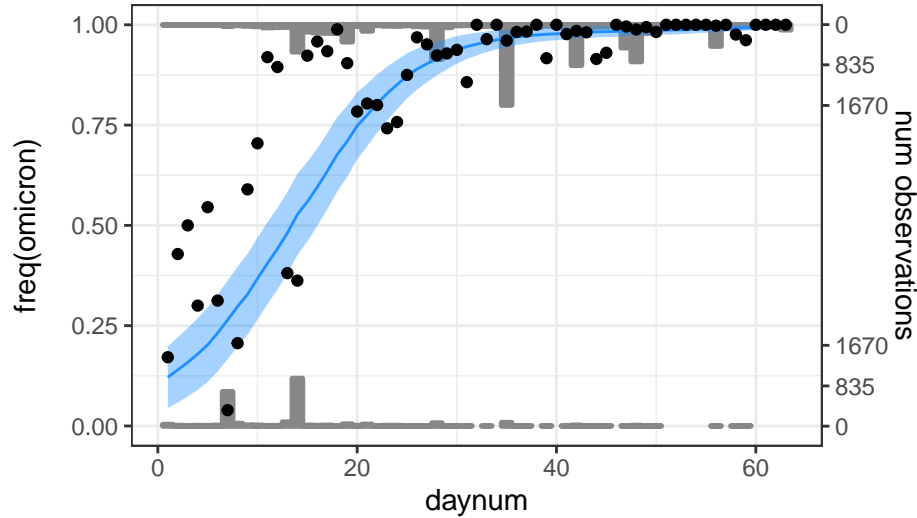

Ireland  
weekly data, weekly predictions

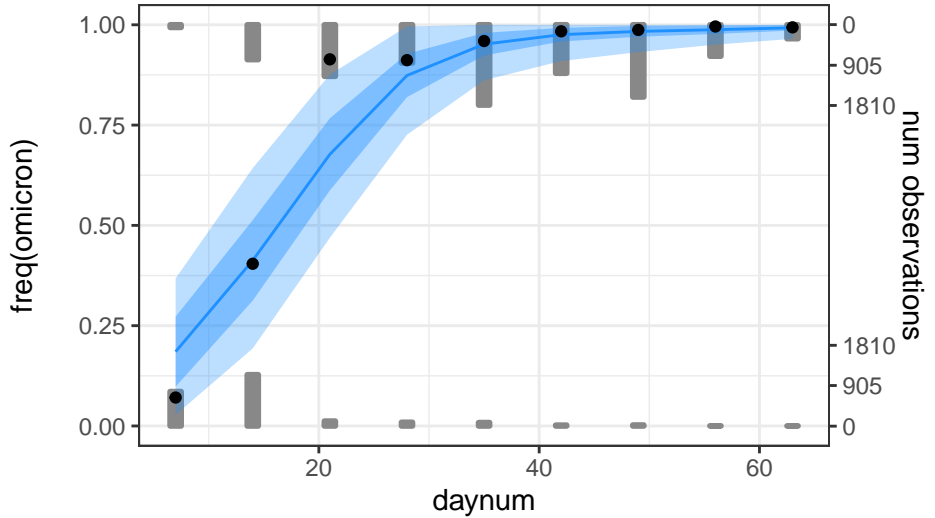

Ireland  
daily predictions

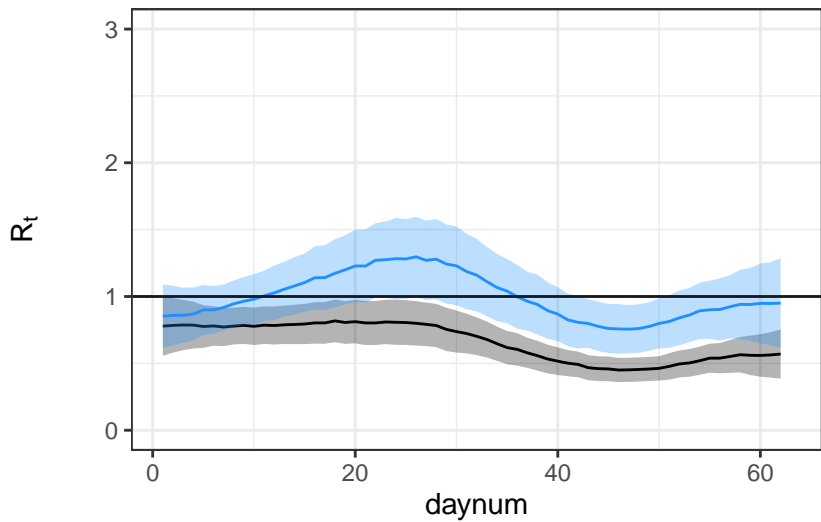



Israel  
daily data, daily predictions

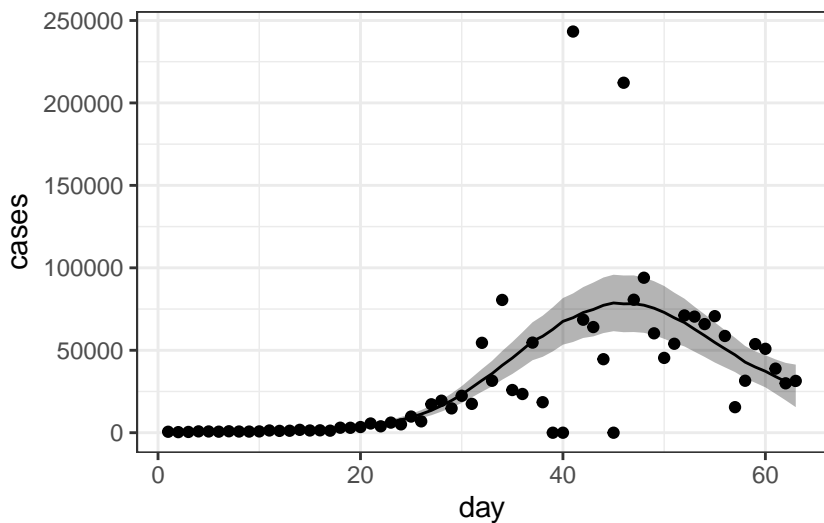

Israel  
weekly data, weekly predictions

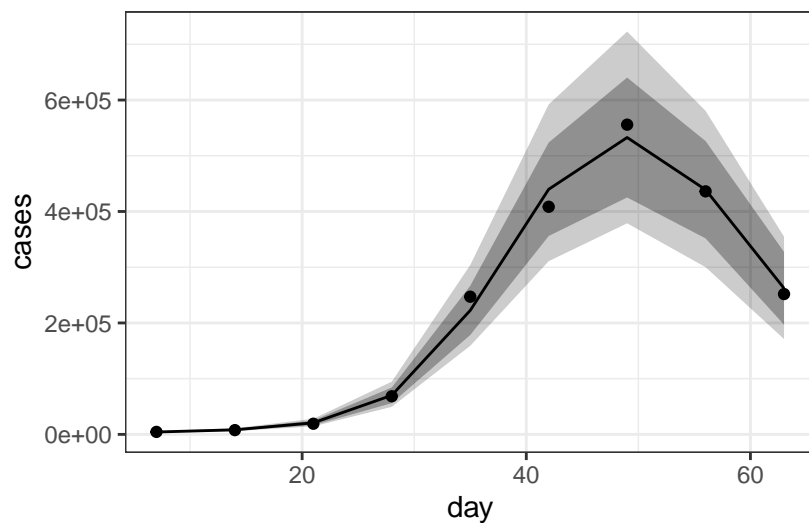

Israel  
daily data, daily predictions

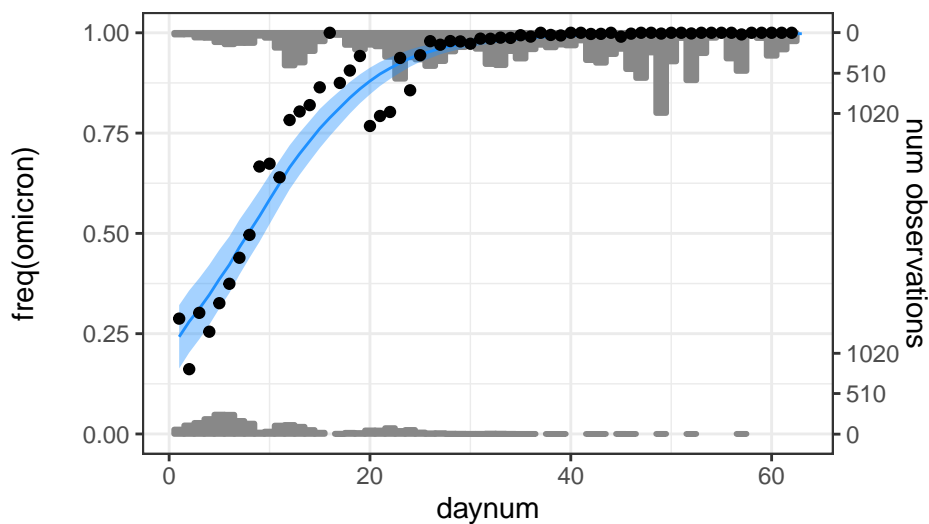

Israel  
weekly data, weekly predictions

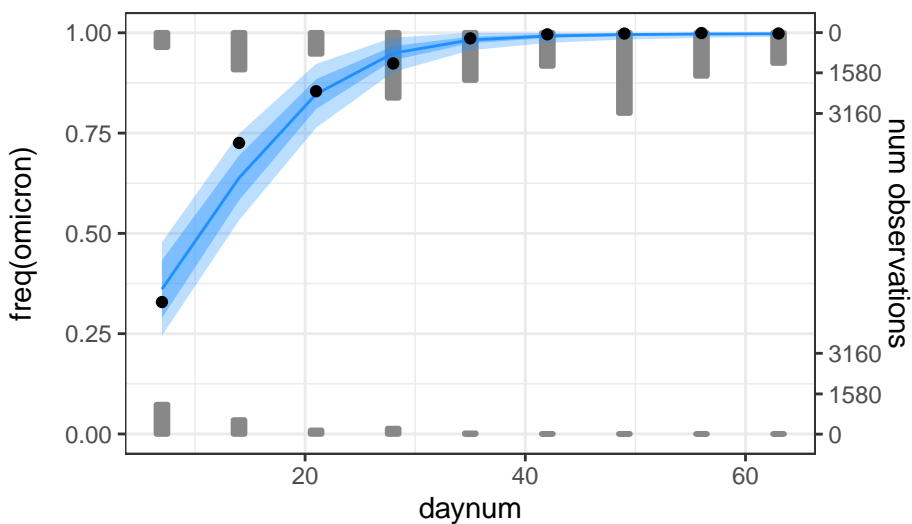

Israel  
daily predictions

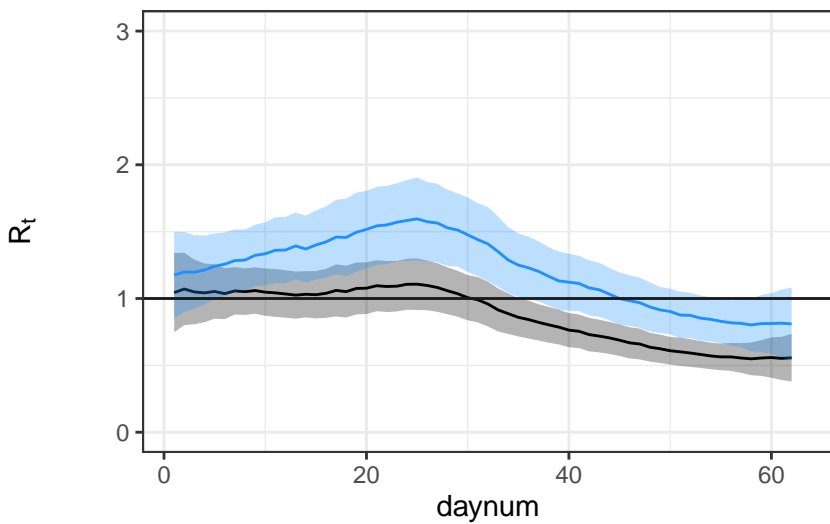

### Italy

daily data, daily predictions

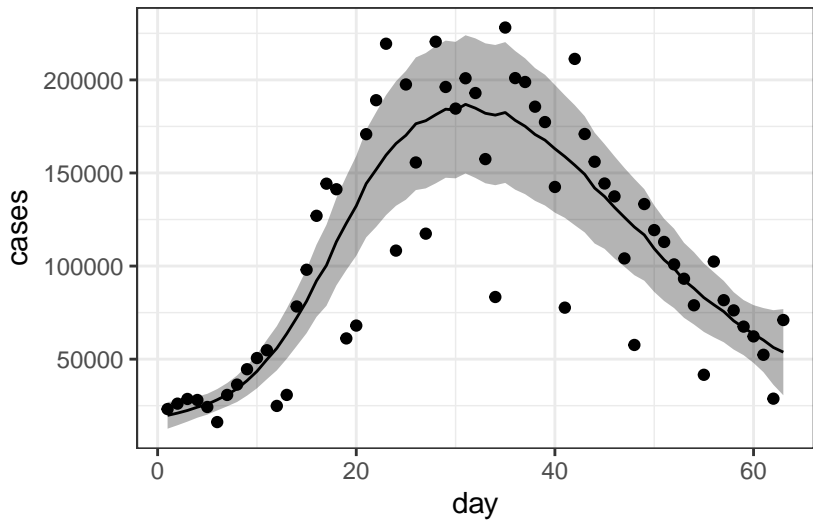

### Italy

weekly data, weekly predictions

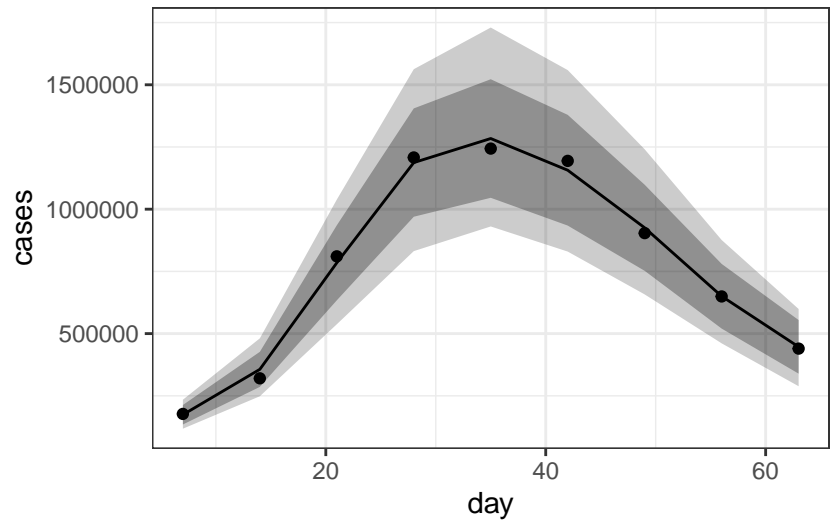

### Italy

daily data, daily predictions

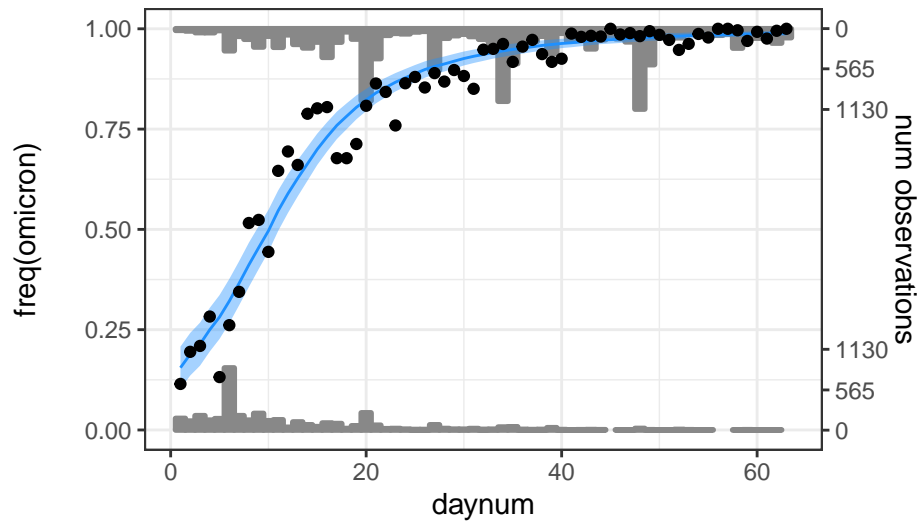

### Italy

weekly data, weekly predictions

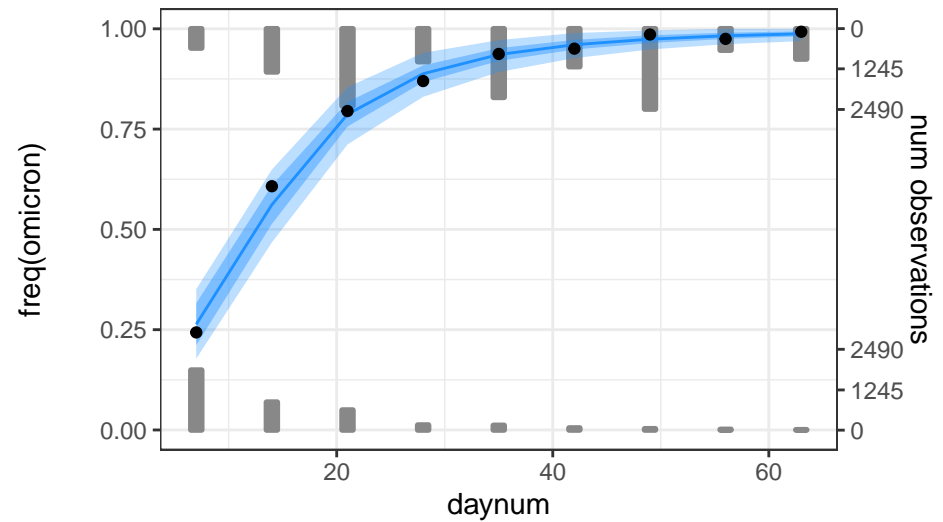

### Italy

daily predictions

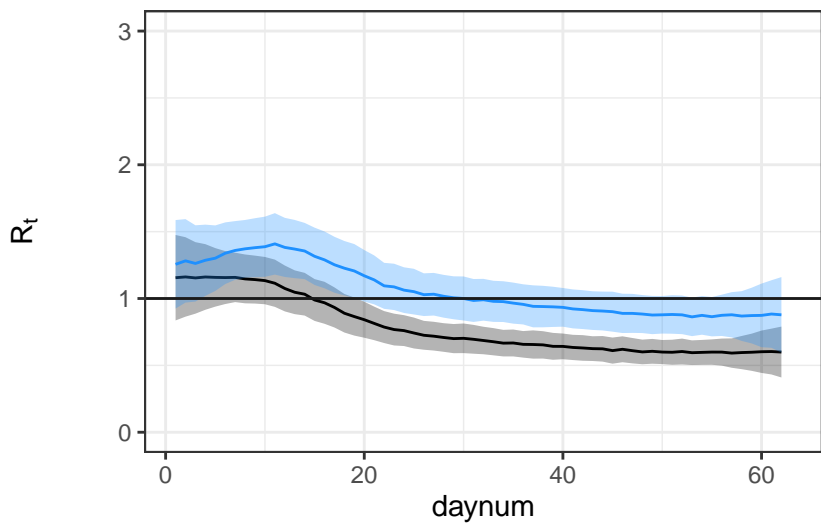

Japan  
daily data, daily predictions

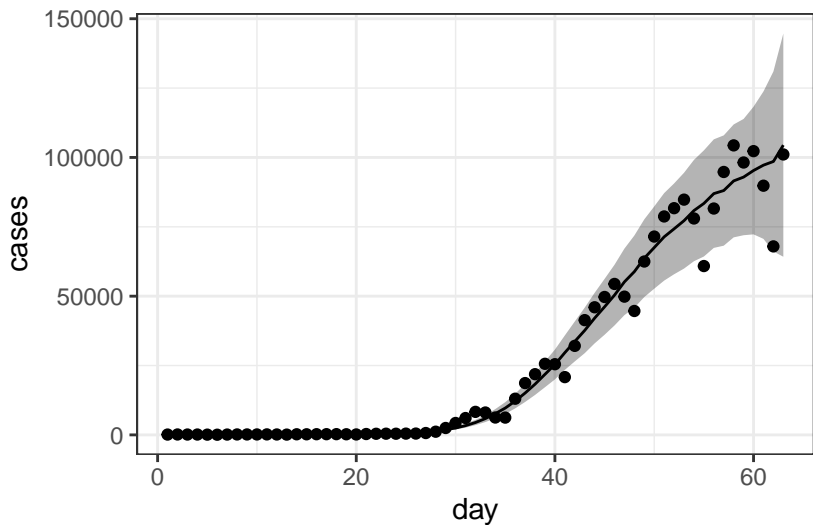

Japan  
weekly data, weekly predictions

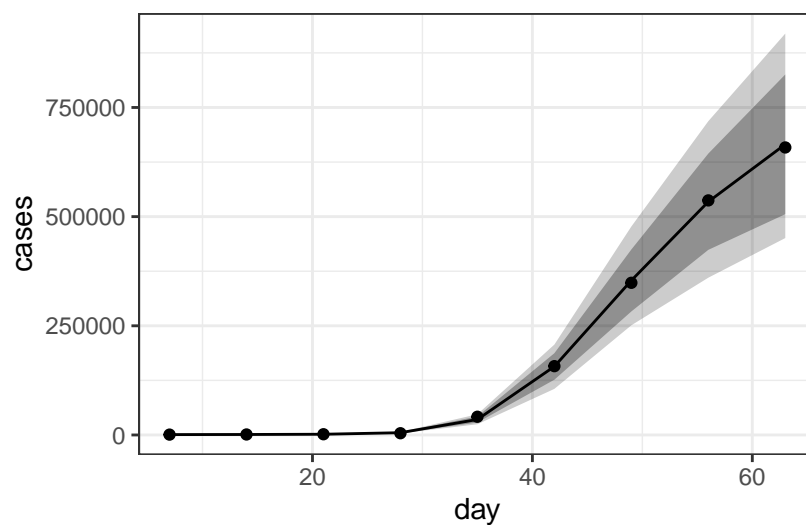

Japan  
daily data, daily predictions

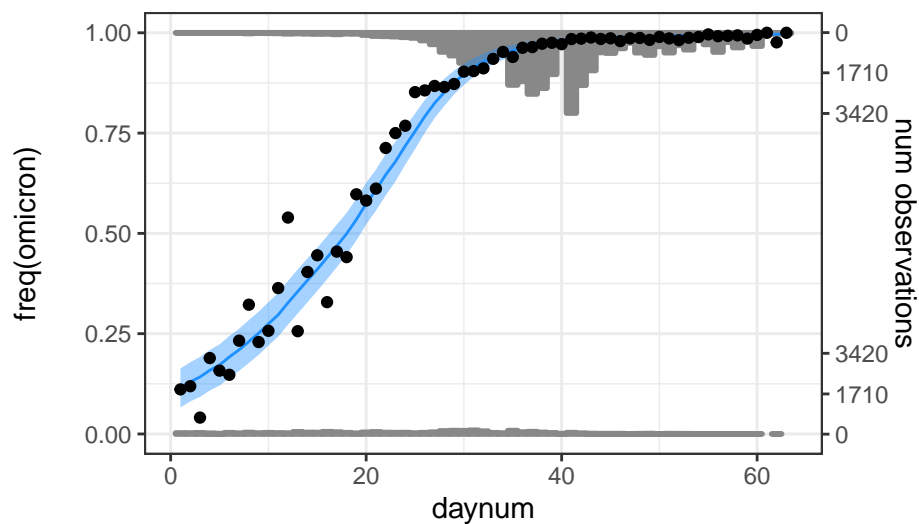

Japan  
weekly data, weekly predictions

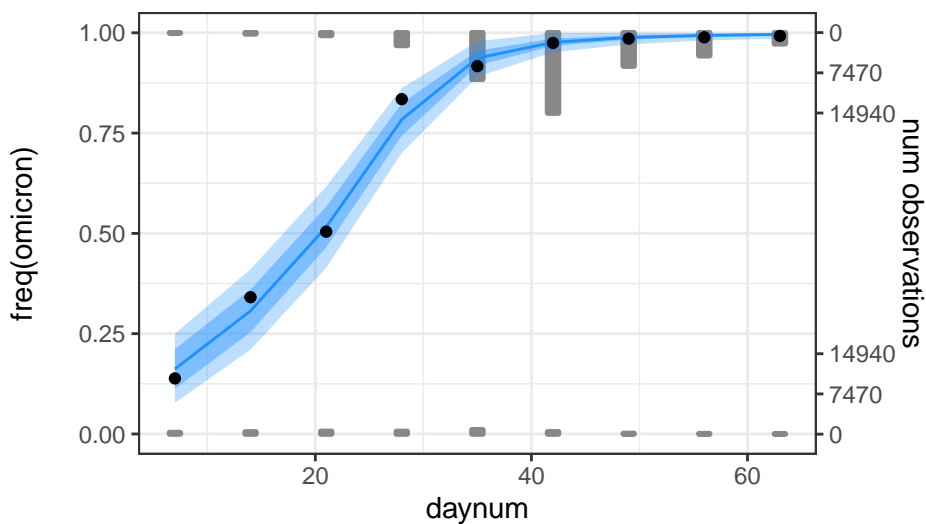

Japan  
daily predictions

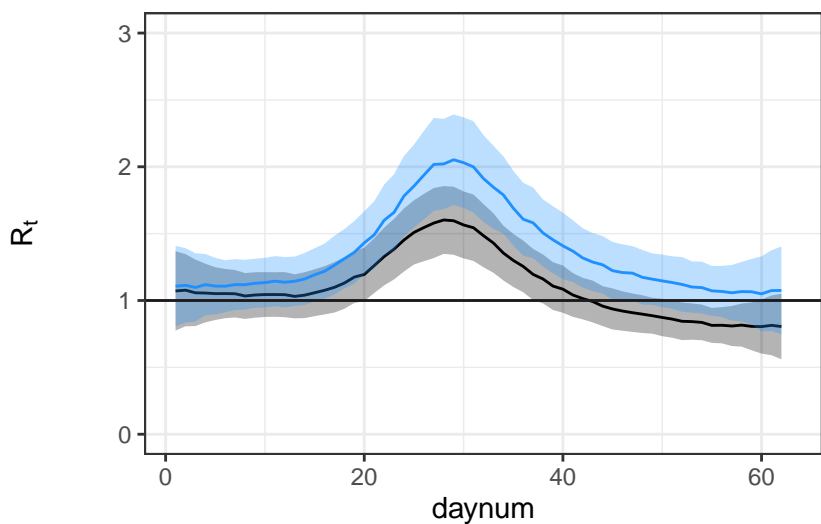

### Lithuania

daily data, daily predictions

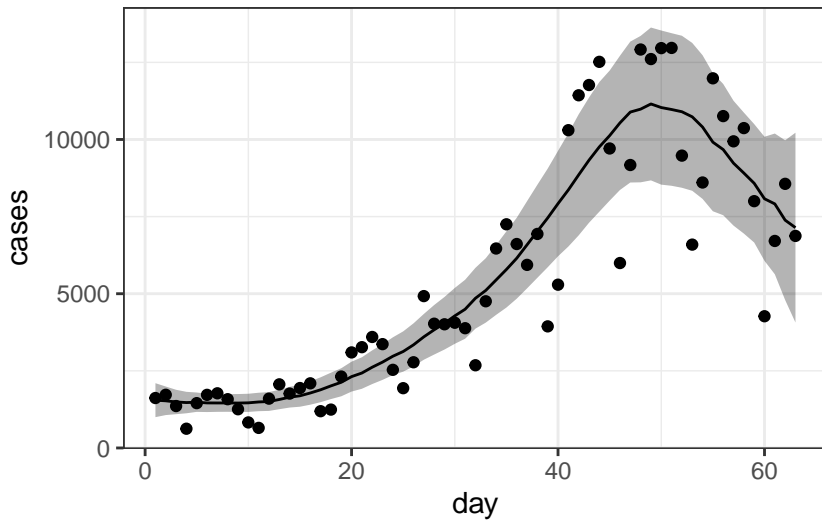

### Lithuania

weekly data, weekly predictions

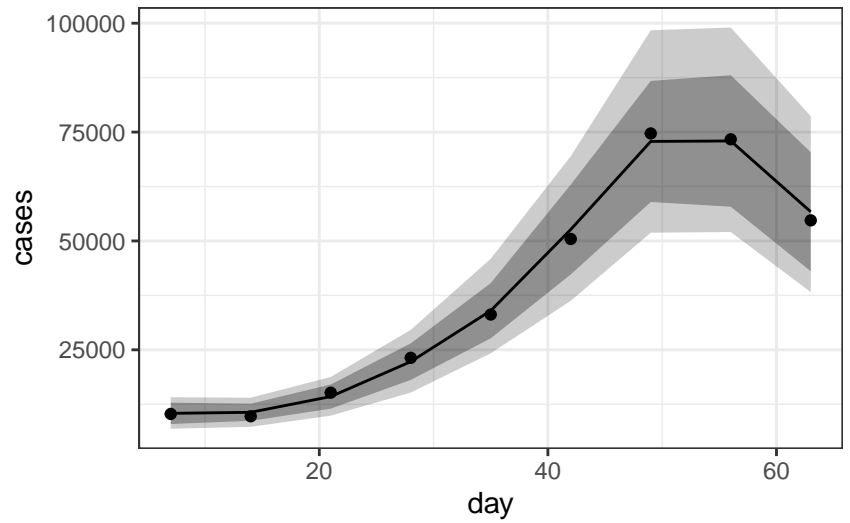

### Lithuania

daily data, daily predictions

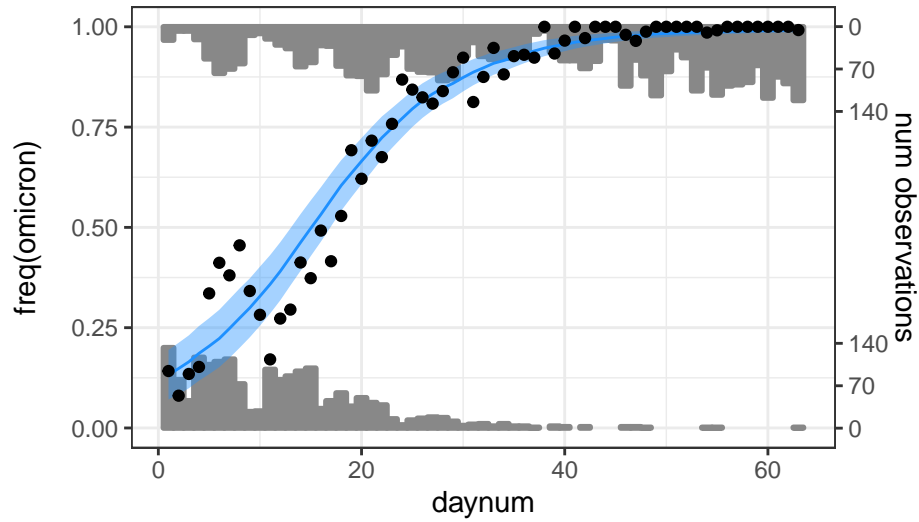

### Lithuania

weekly data, weekly predictions

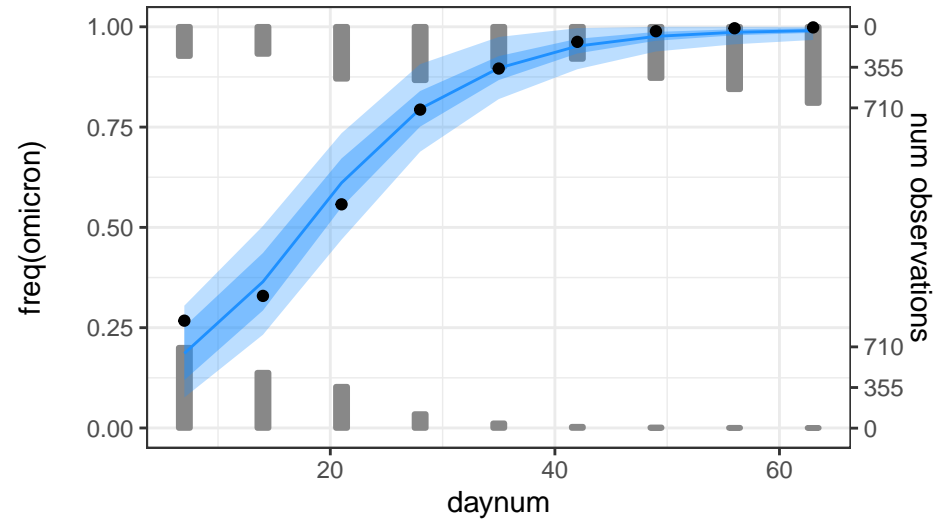

### Lithuania

daily predictions

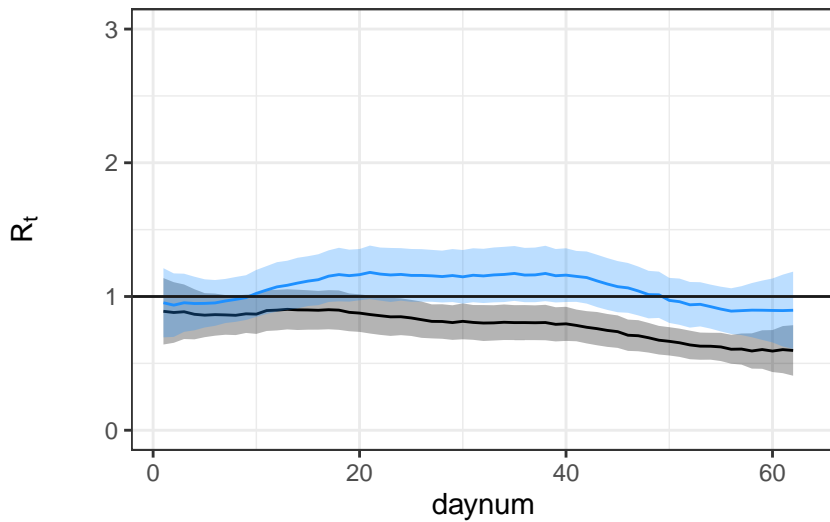

Malaysia  
daily data, daily predictions

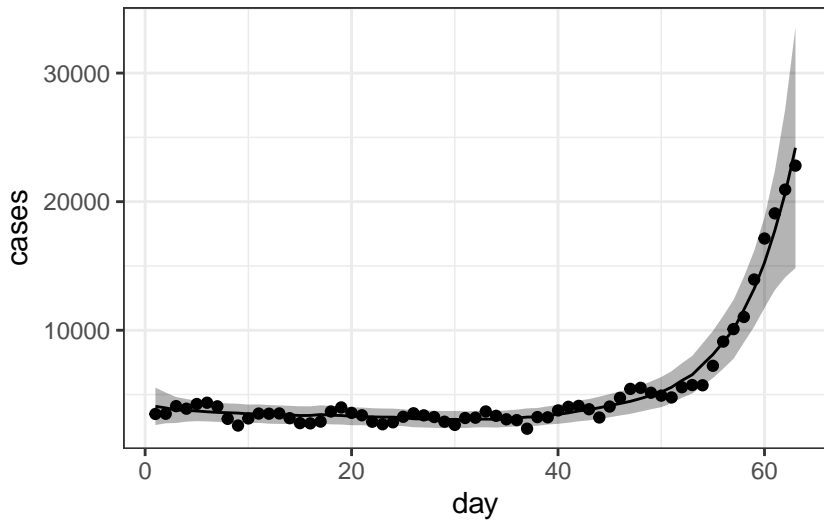

Malaysia  
weekly data, weekly predictions

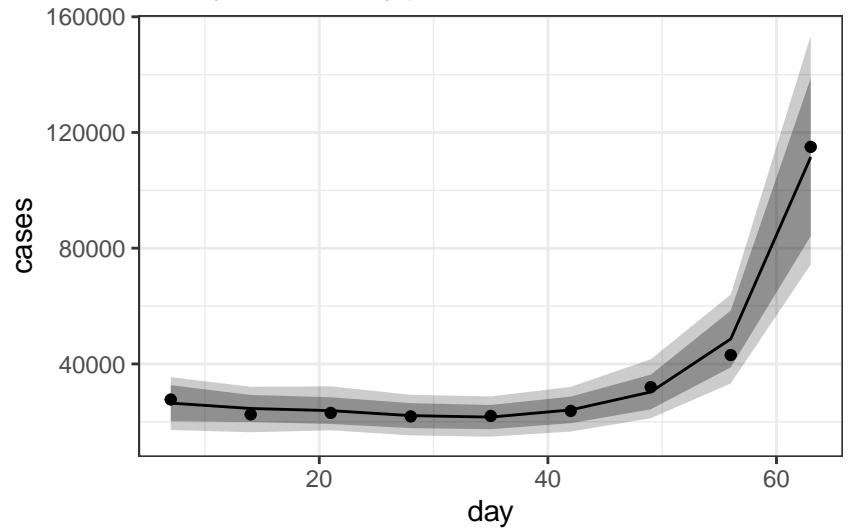

Malaysia  
daily data, daily predictions

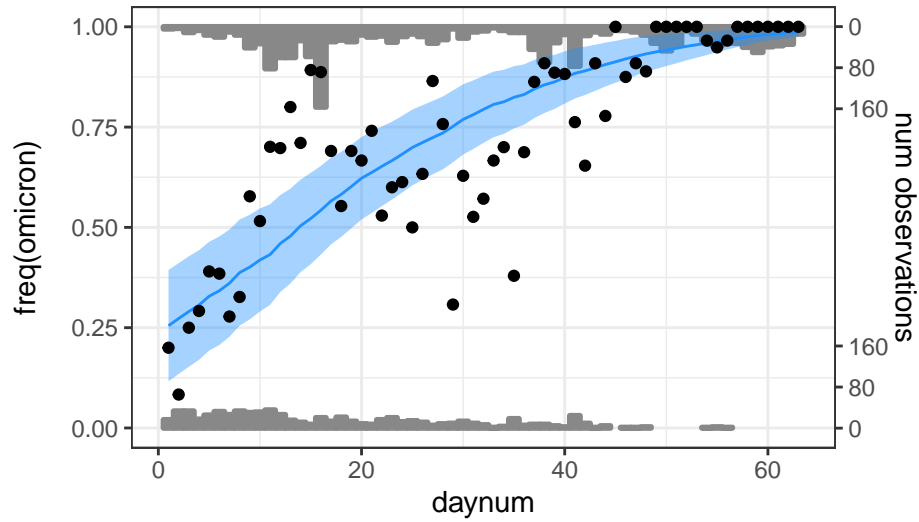

Malaysia  
weekly data, weekly predictions

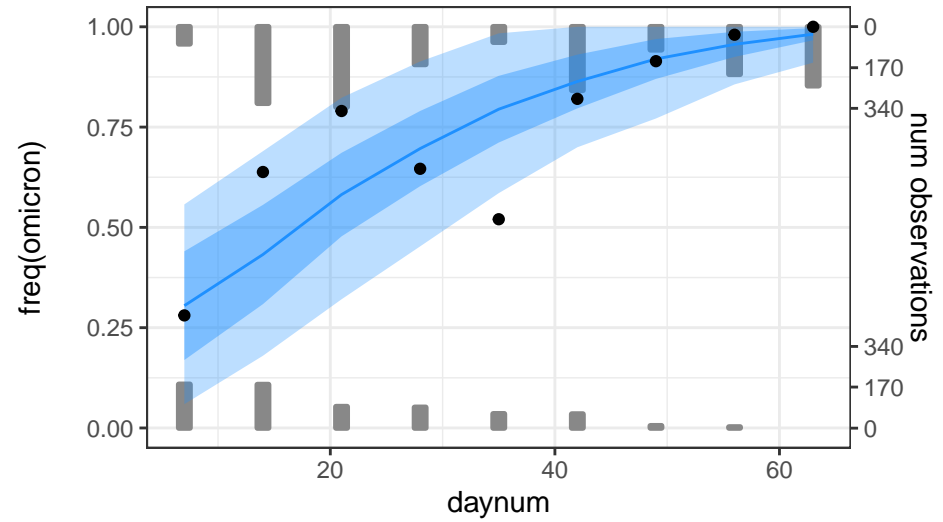

Malaysia  
daily predictions

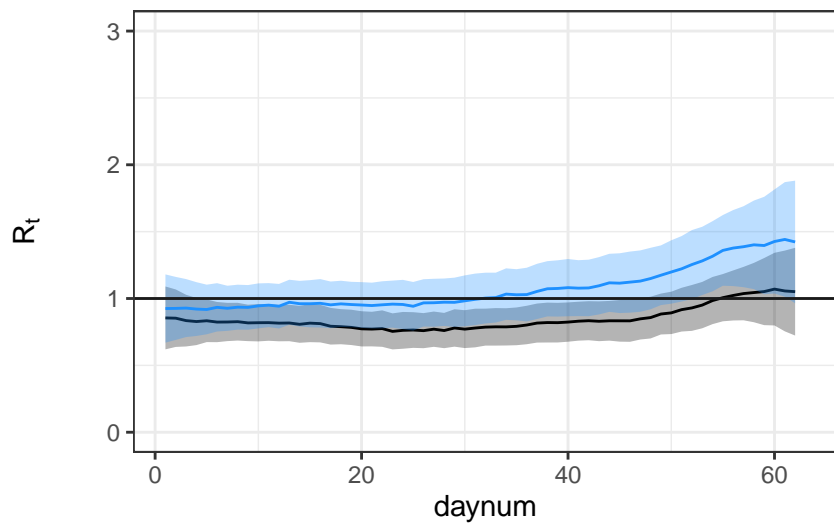

Mexico  
daily data, daily predictions

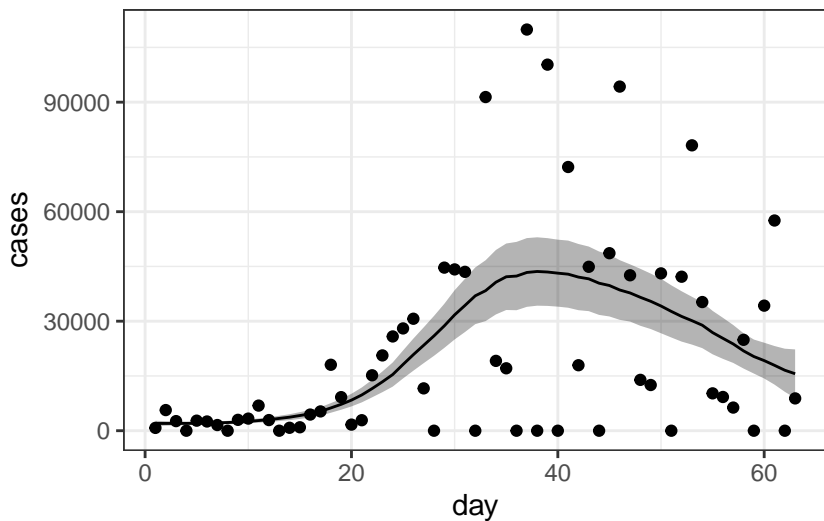

Mexico  
weekly data, weekly predictions

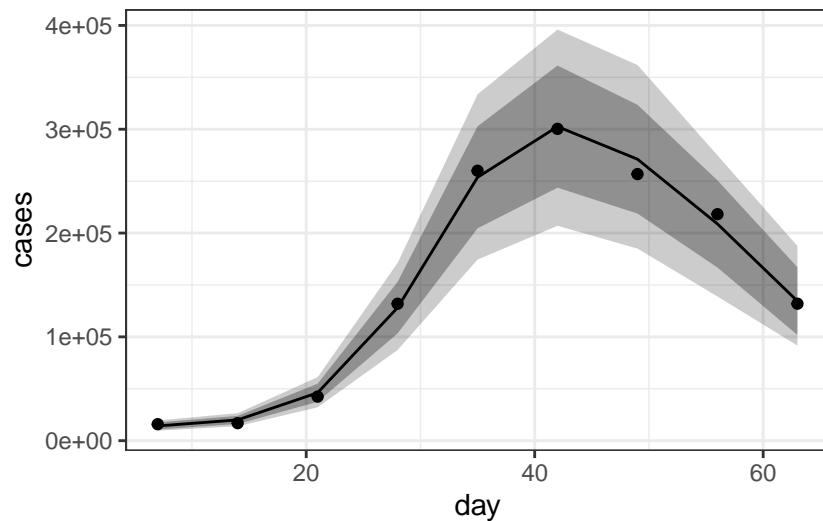

Mexico  
daily data, daily predictions

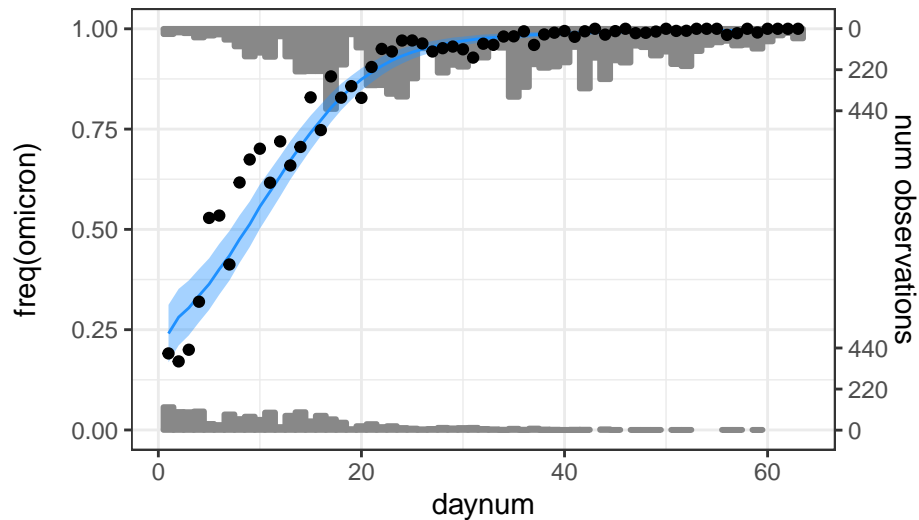

Mexico  
weekly data, weekly predictions

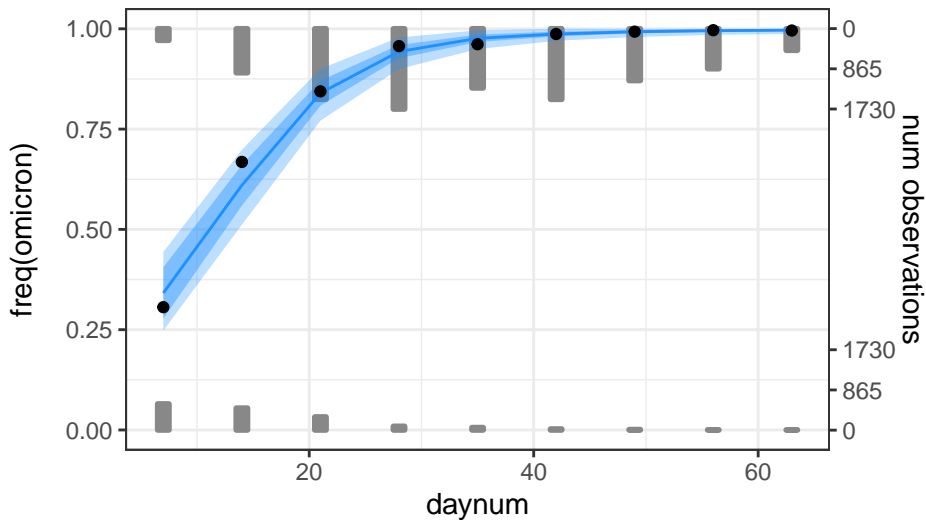

Mexico  
daily predictions

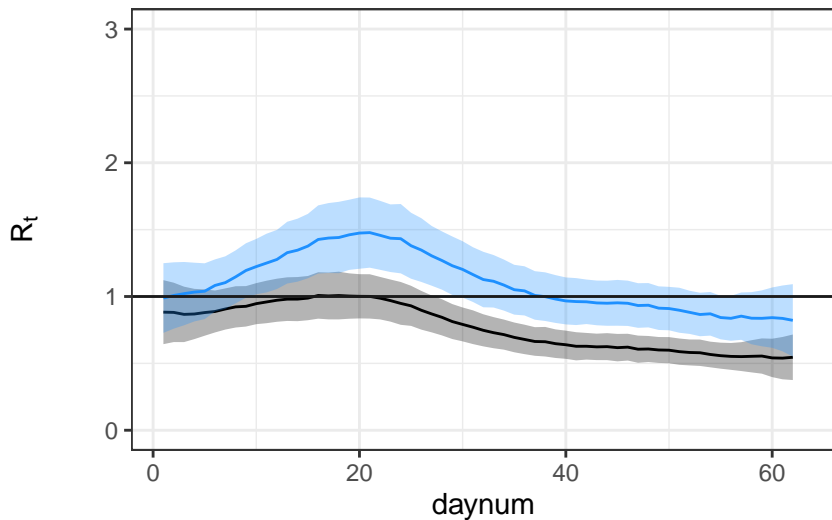

### Netherlands

daily data, daily predictions

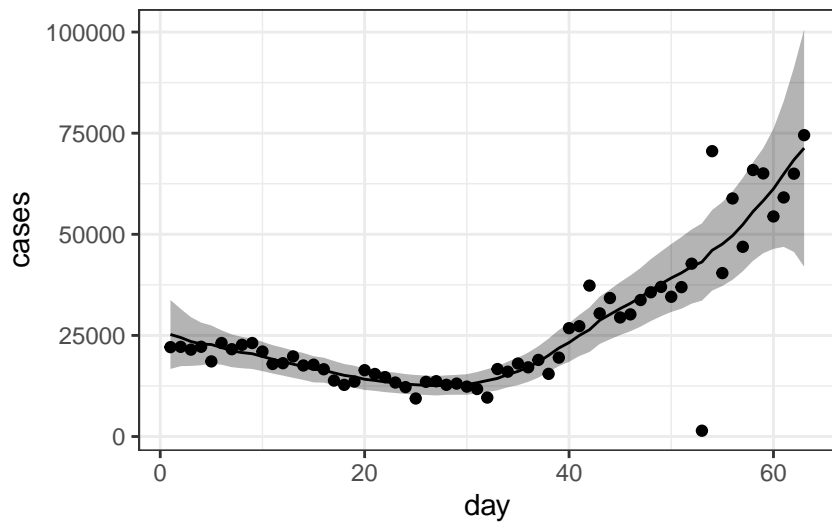

### Netherlands

weekly data, weekly predictions

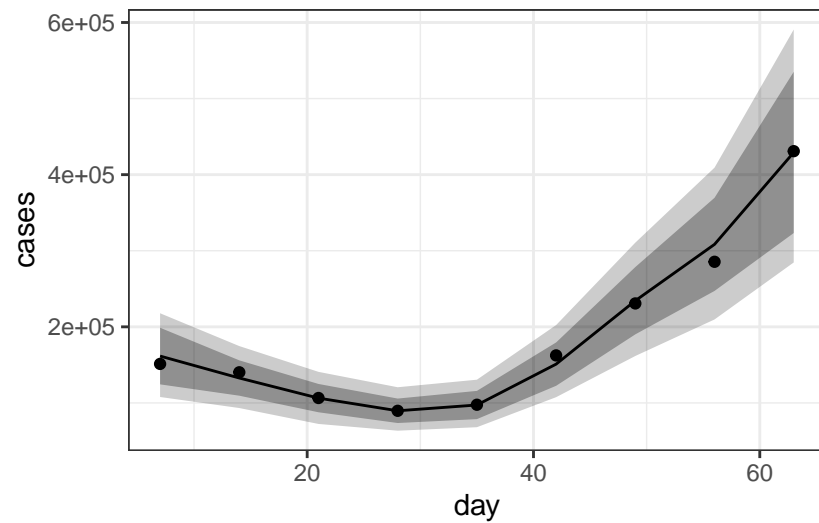

### Netherlands

daily data, daily predictions

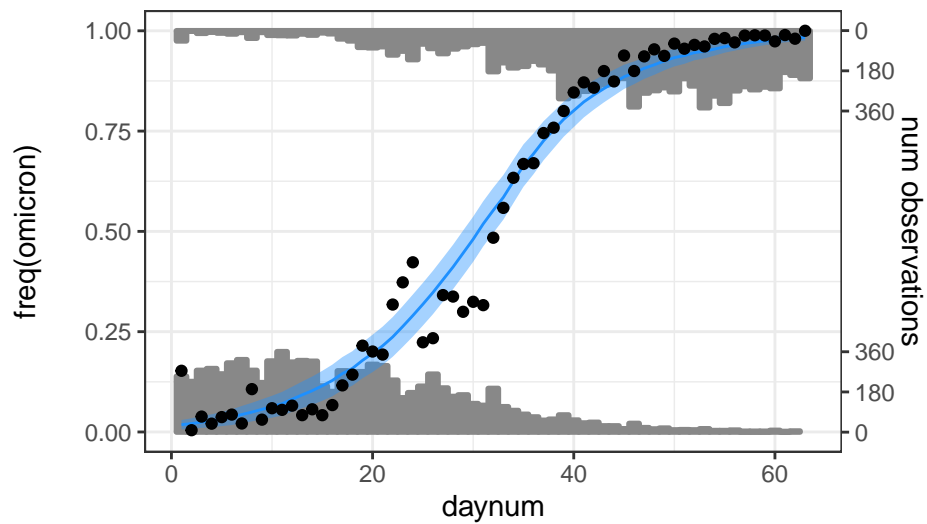

### Netherlands

weekly data, weekly predictions

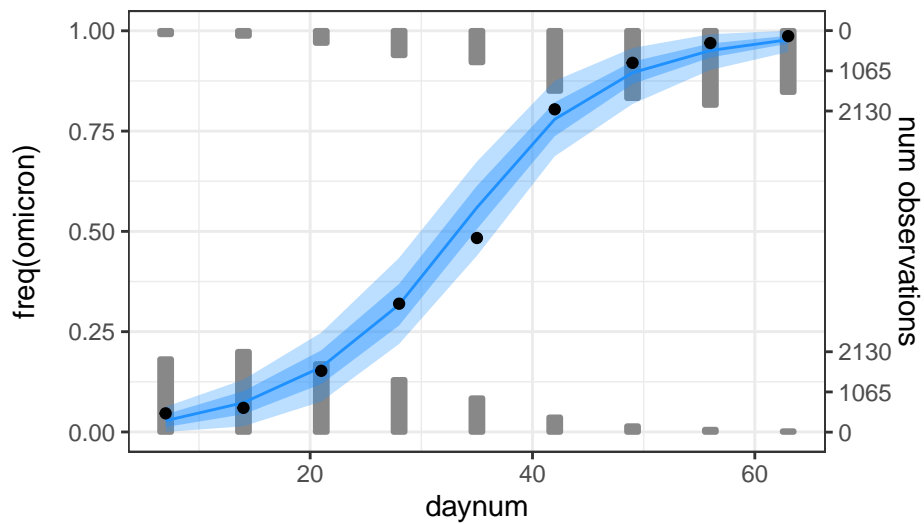

### Netherlands

daily predictions

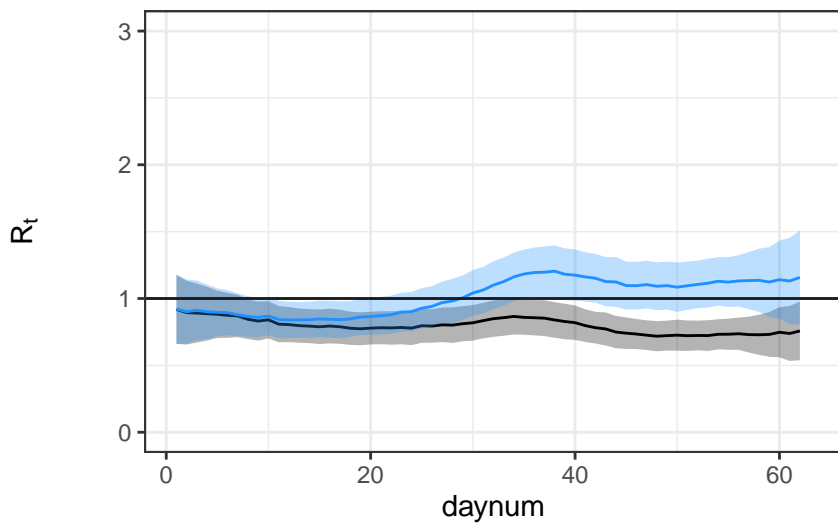

New Zealand  
daily data, daily predictions

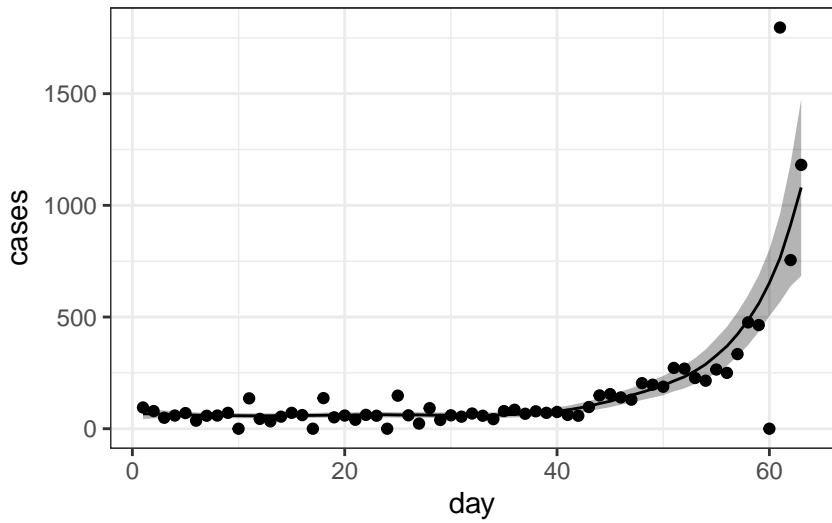

New Zealand  
weekly data, weekly predictions

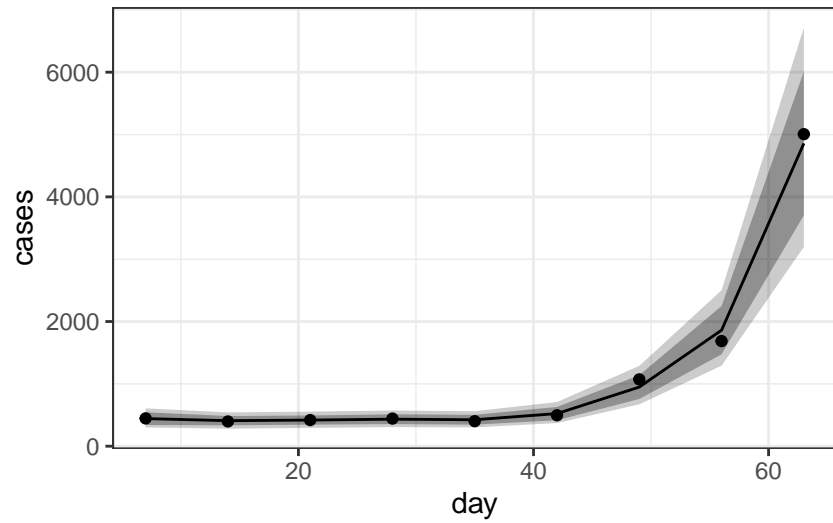

New Zealand  
daily data, daily predictions

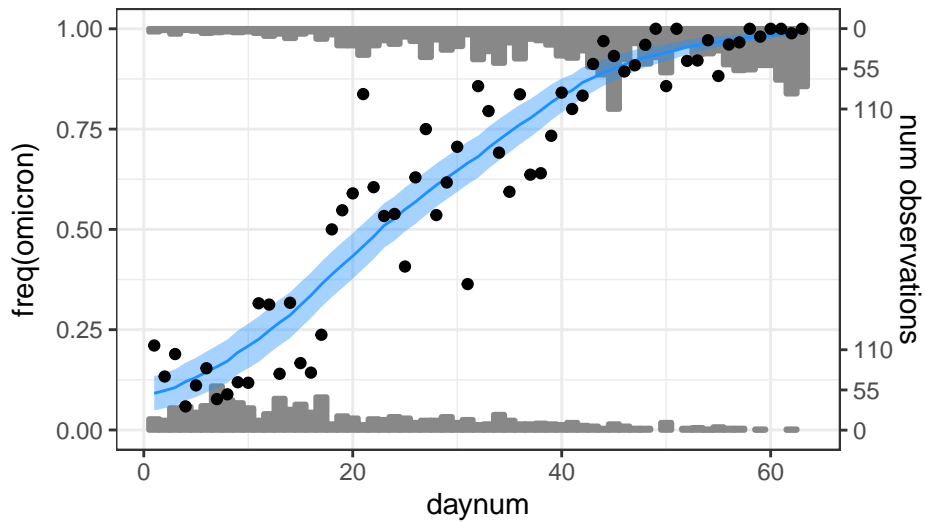

New Zealand  
weekly data, weekly predictions

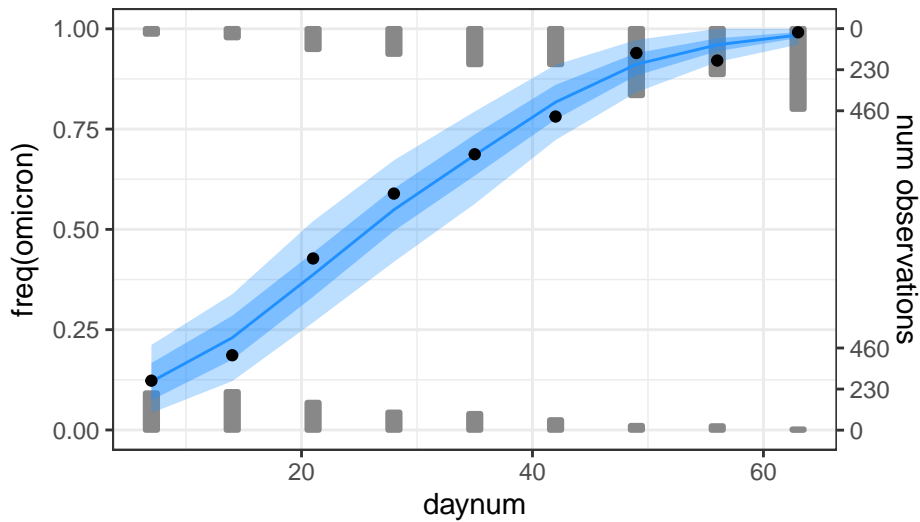

New Zealand  
daily predictions

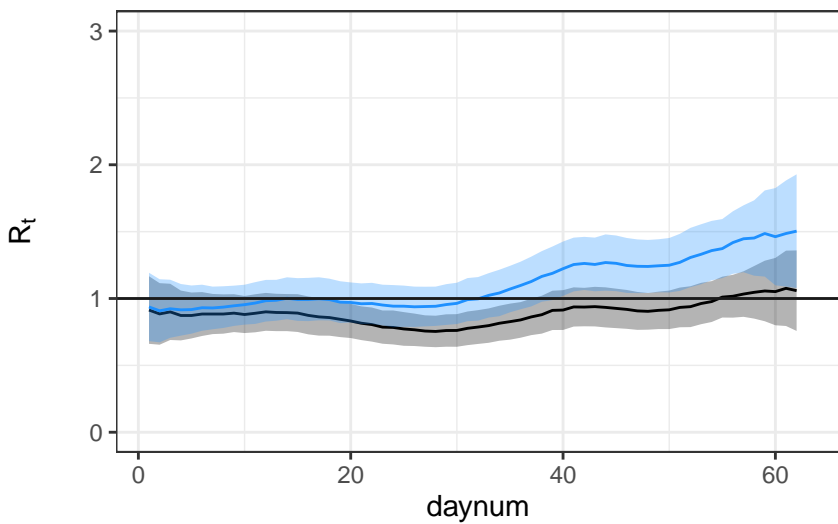



### Norway

daily data, daily predictions

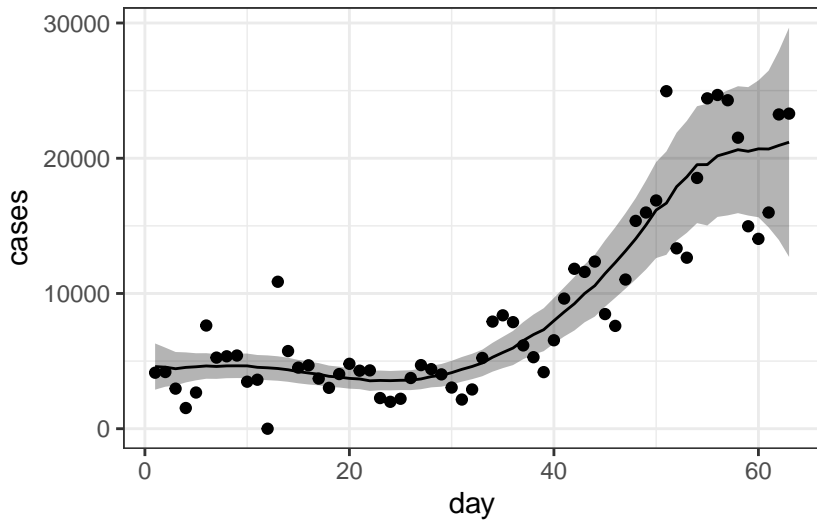

### Norway

weekly data, weekly predictions

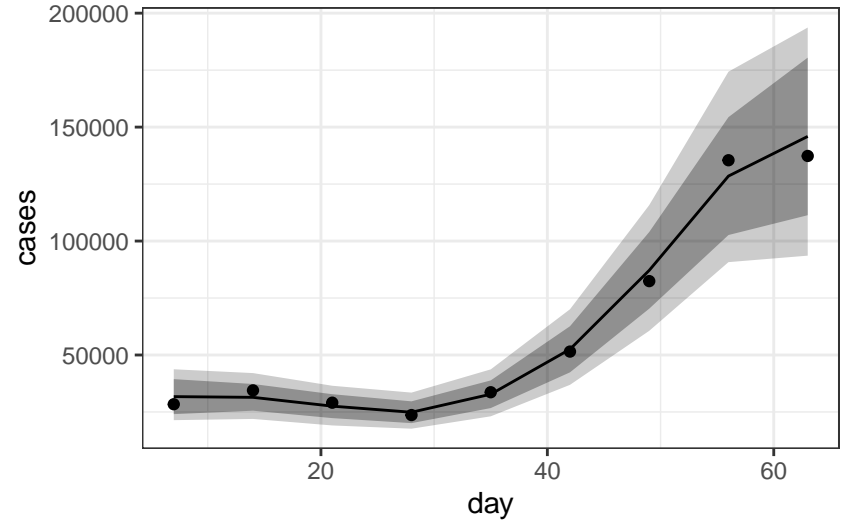

### Norway

daily data, daily predictions

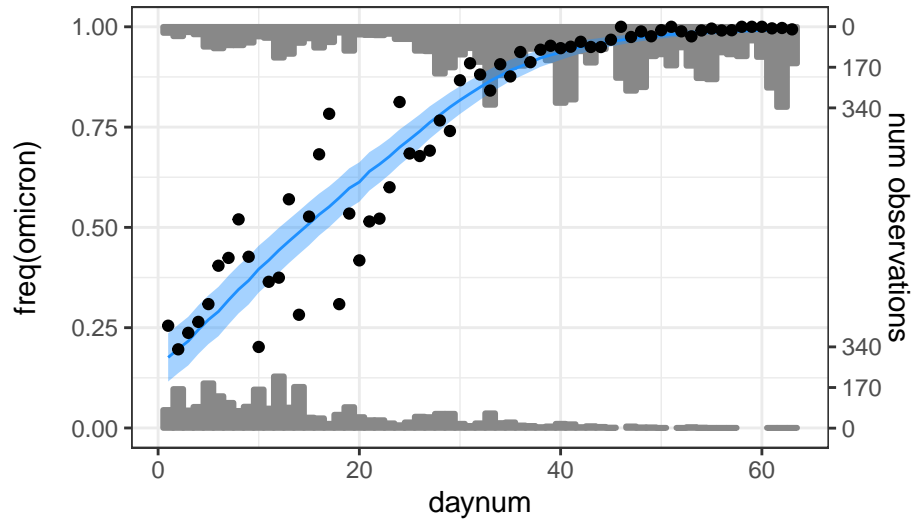

### Norway

weekly data, weekly predictions

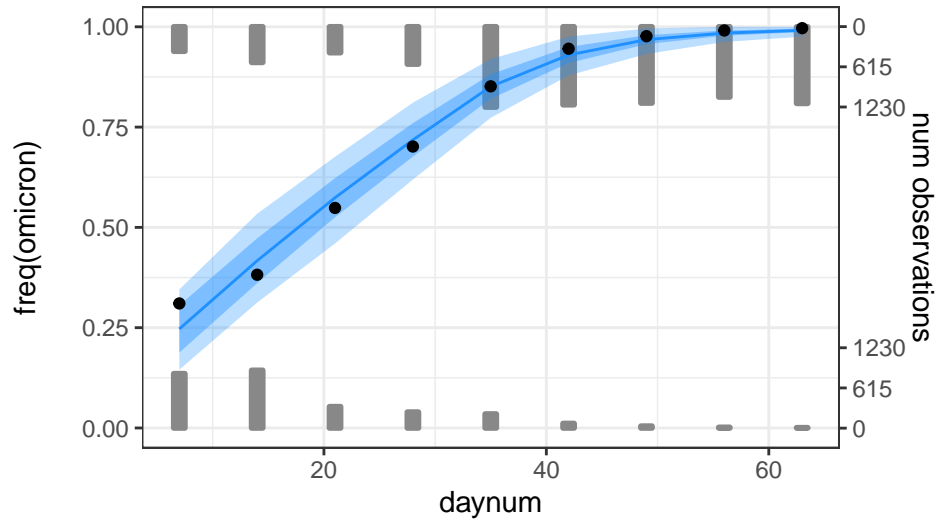

### Norway

daily predictions

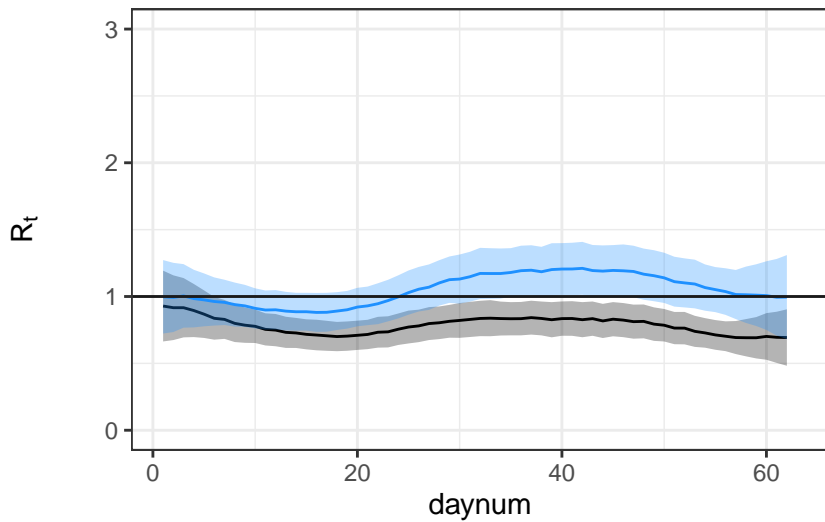

Peru

daily data, daily predictions

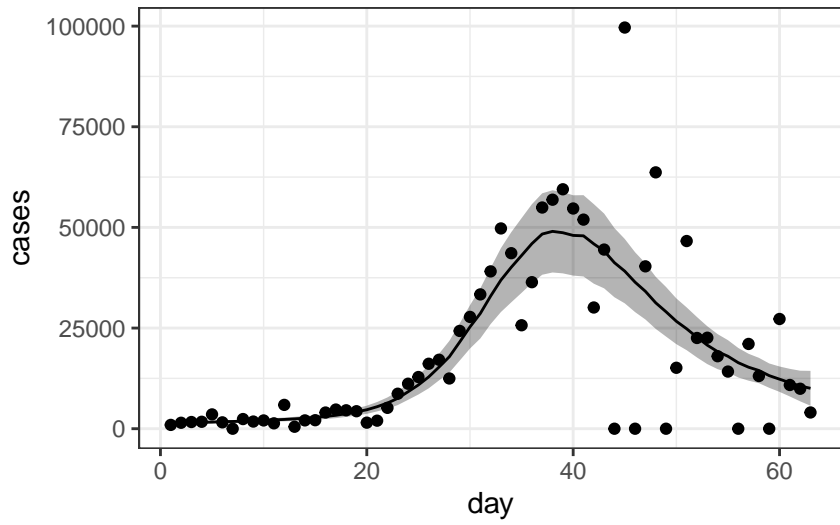

Peru

weekly data, weekly predictions

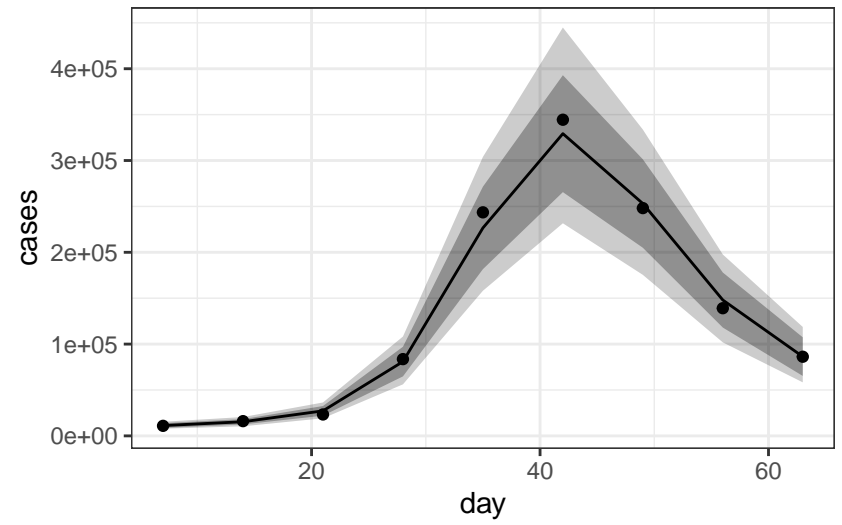

Peru

daily data, daily predictions

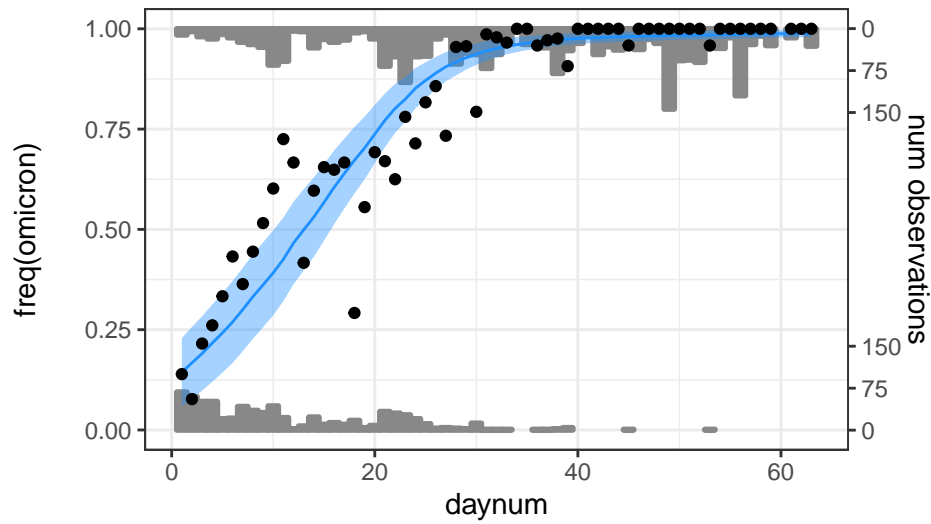

Peru

weekly data, weekly predictions

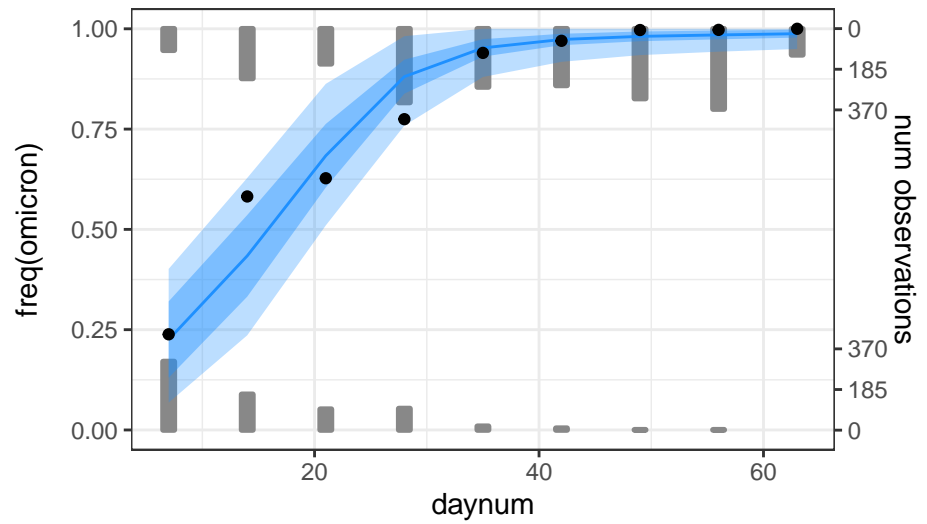

Peru

daily predictions

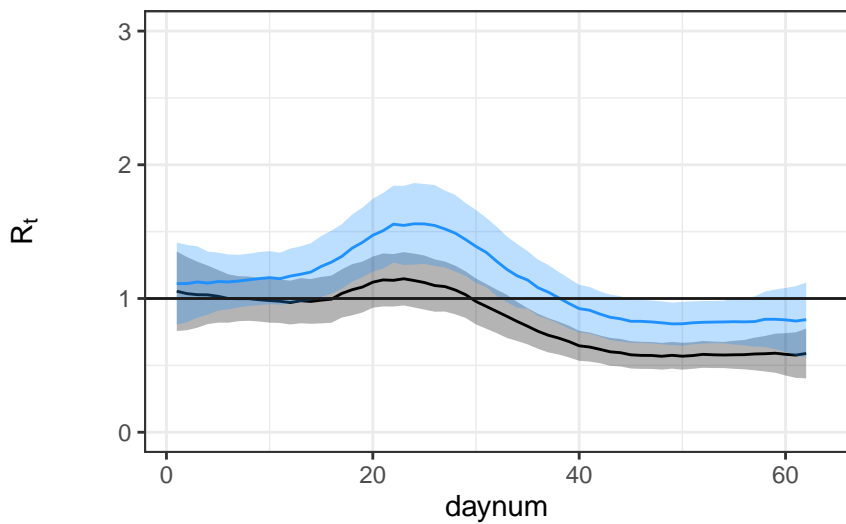

Poland  
daily data, daily predictions

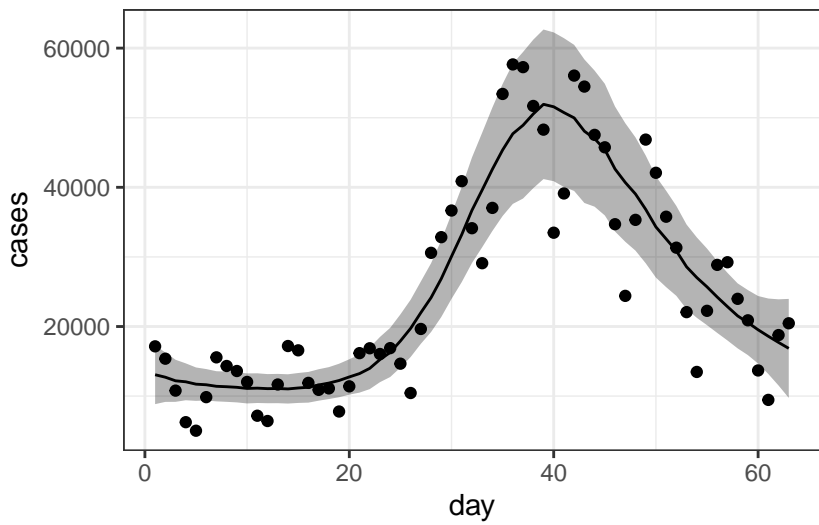

Poland  
weekly data, weekly predictions

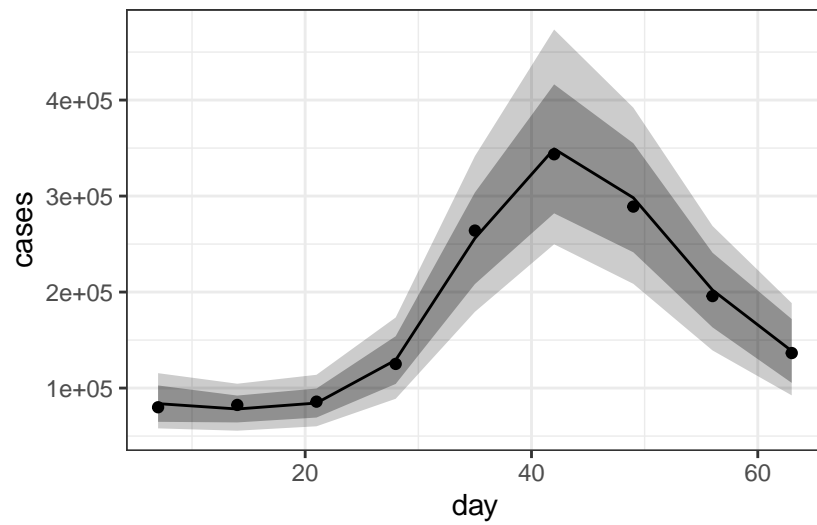

Poland  
daily data, daily predictions

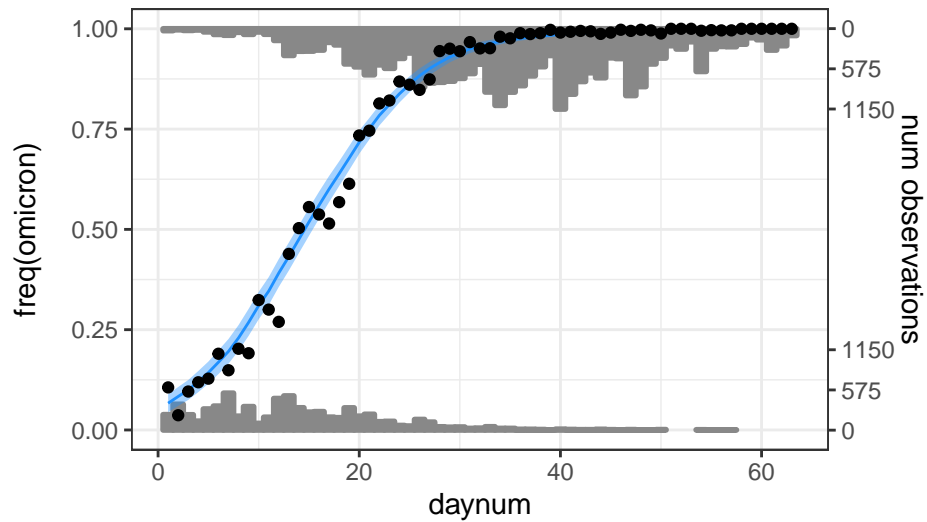

Poland  
weekly data, weekly predictions

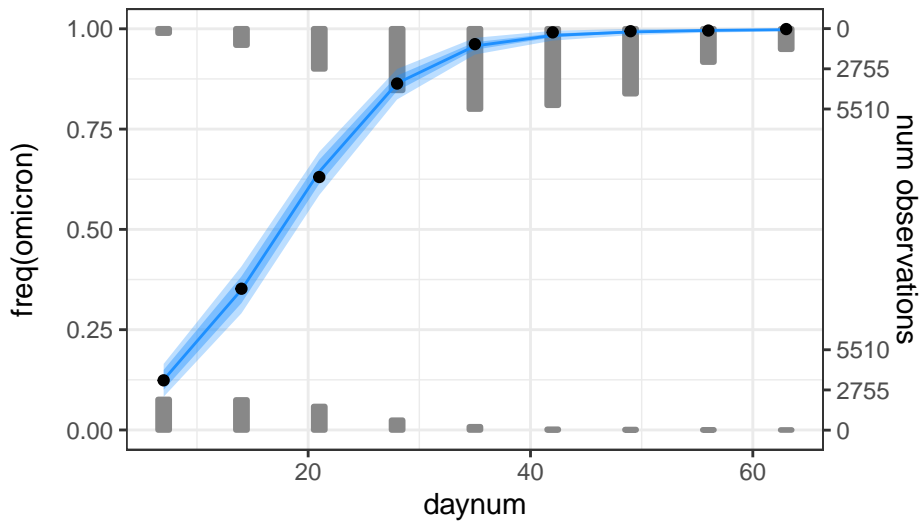

Poland  
daily predictions

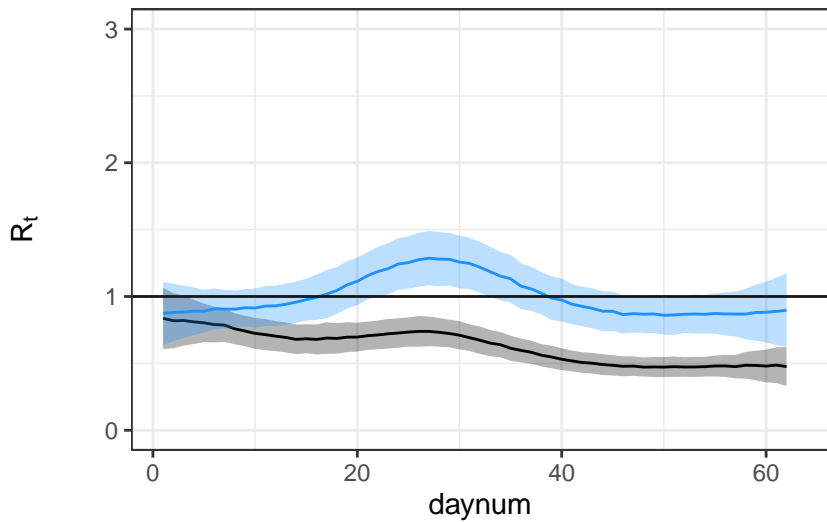

Portugal  
daily data, daily predictions

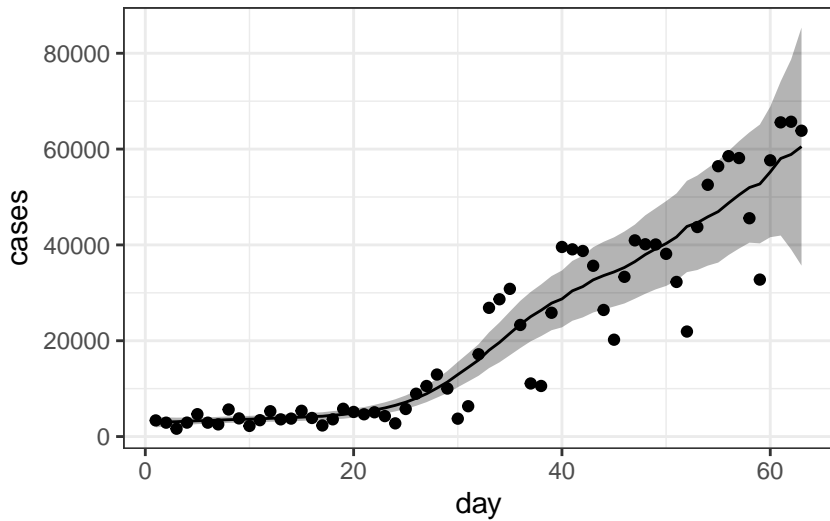

Portugal  
weekly data, weekly predictions

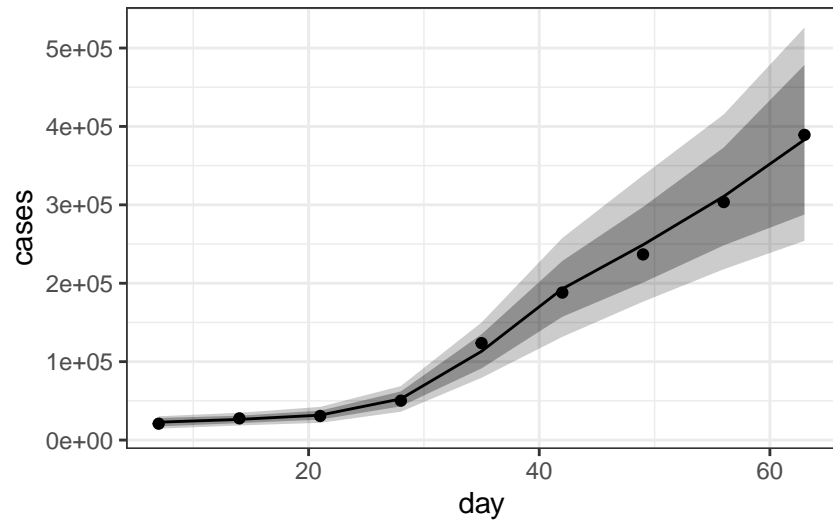

Portugal  
daily data, daily predictions

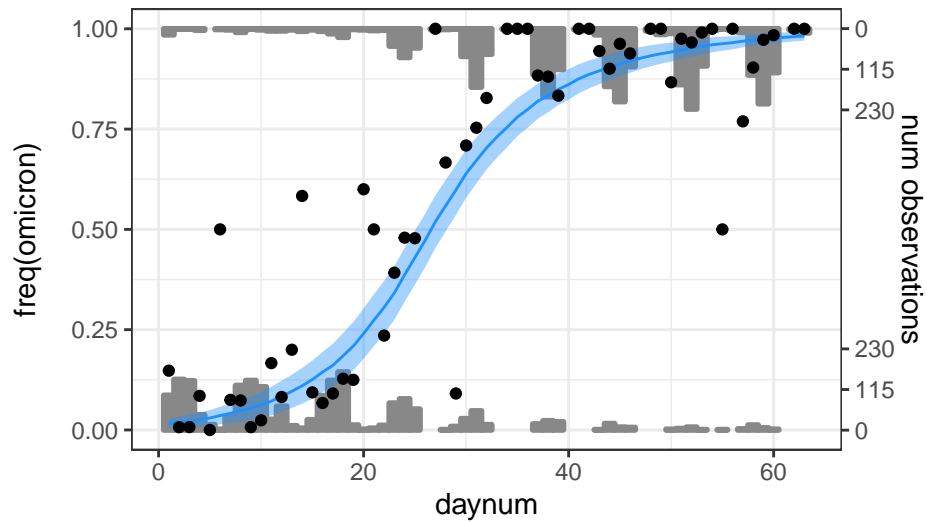

Portugal  
weekly data, weekly predictions

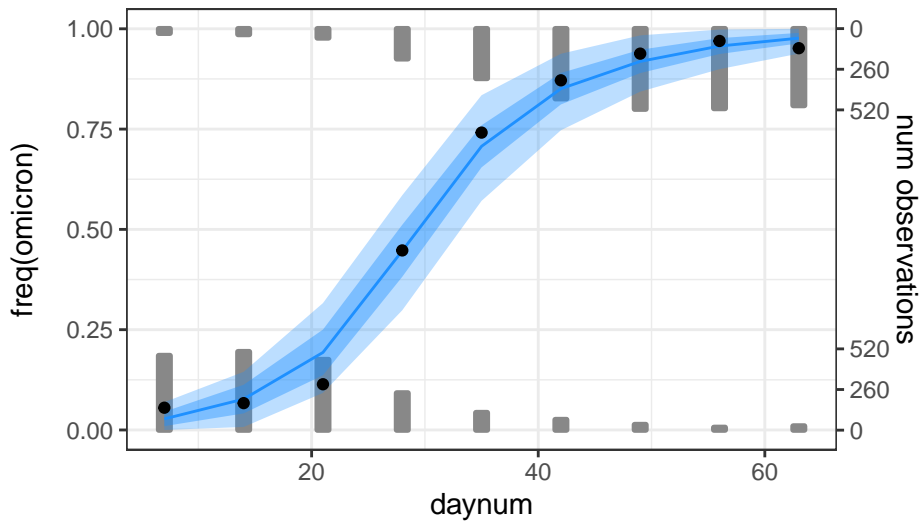

Portugal  
daily predictions

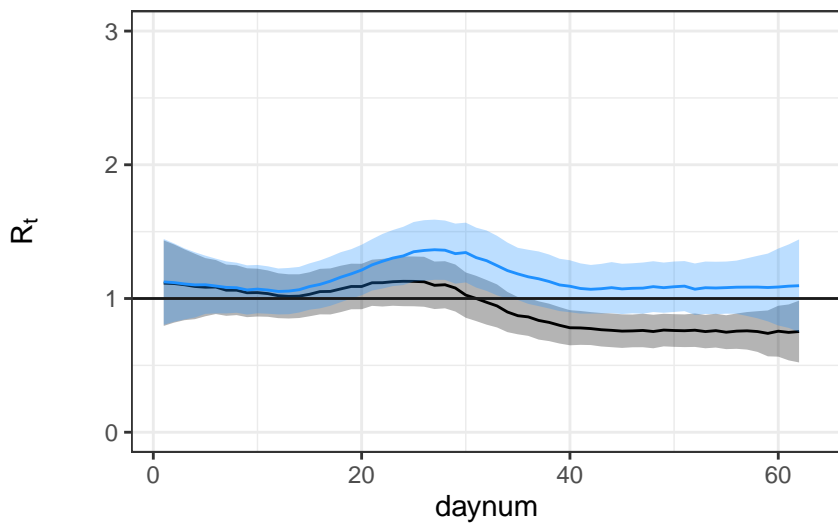

Romania  
daily data, daily predictions

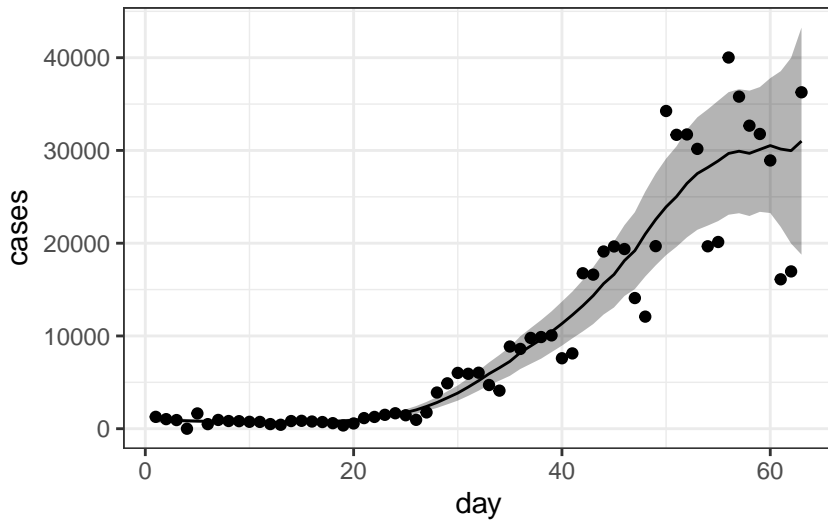

Romania  
weekly data, weekly predictions

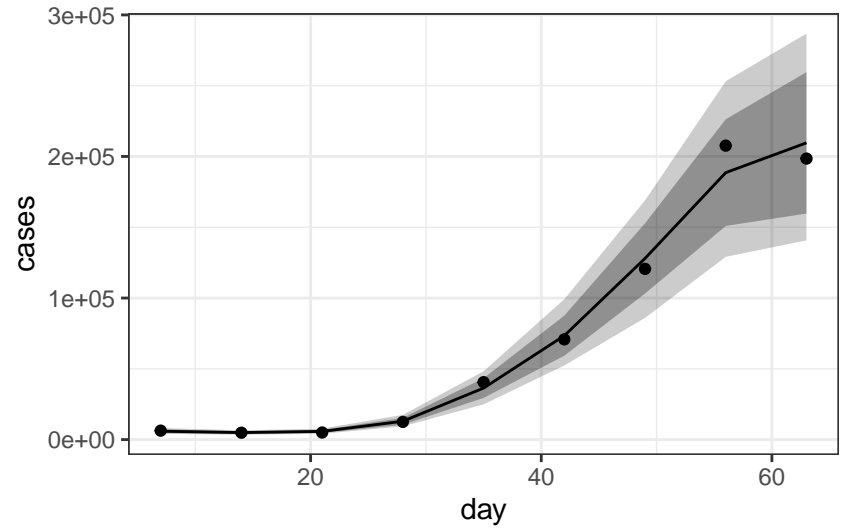

Romania  
daily data, daily predictions

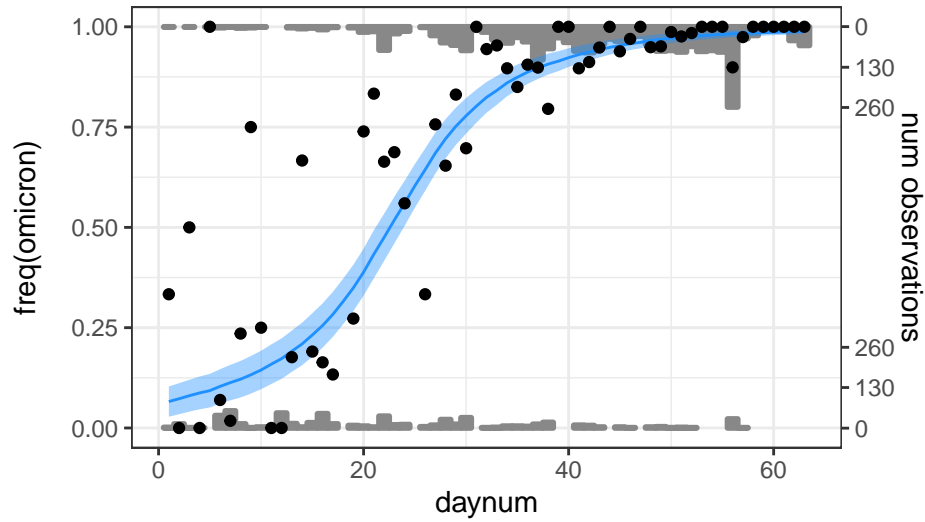

Romania  
weekly data, weekly predictions

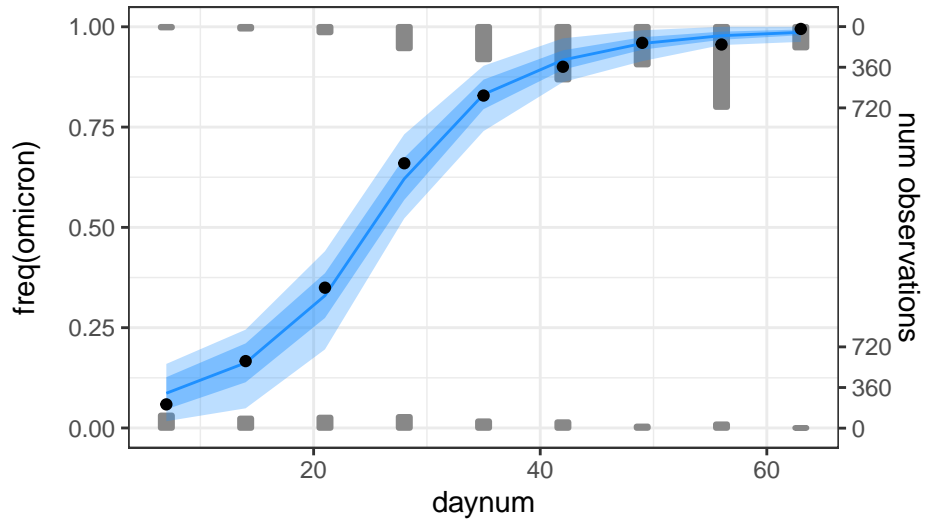

Romania  
daily predictions

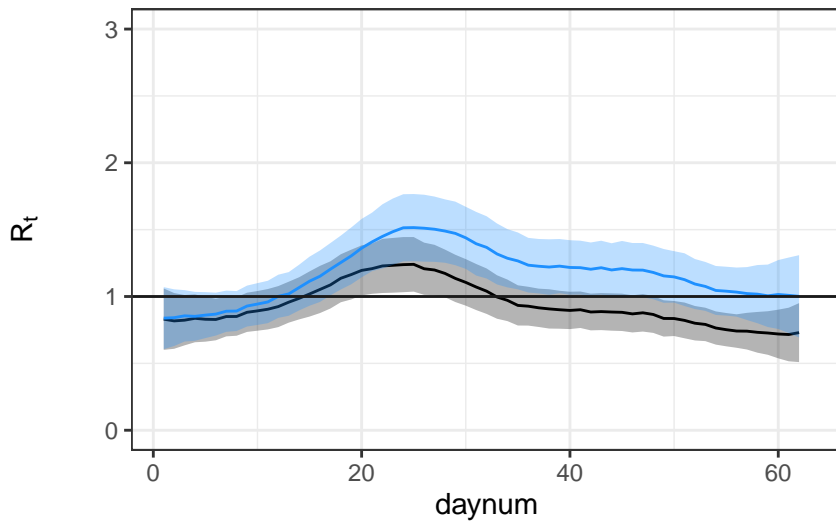

Singapore  
daily data, daily predictions

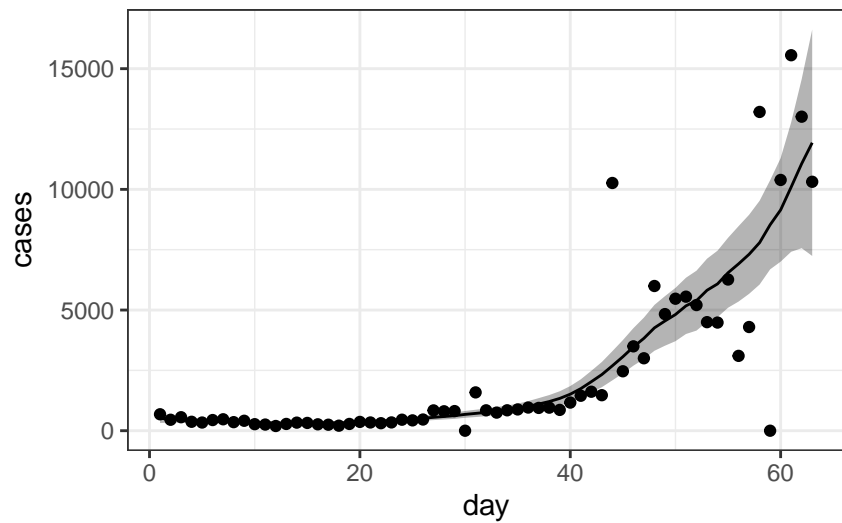

Singapore  
weekly data, weekly predictions

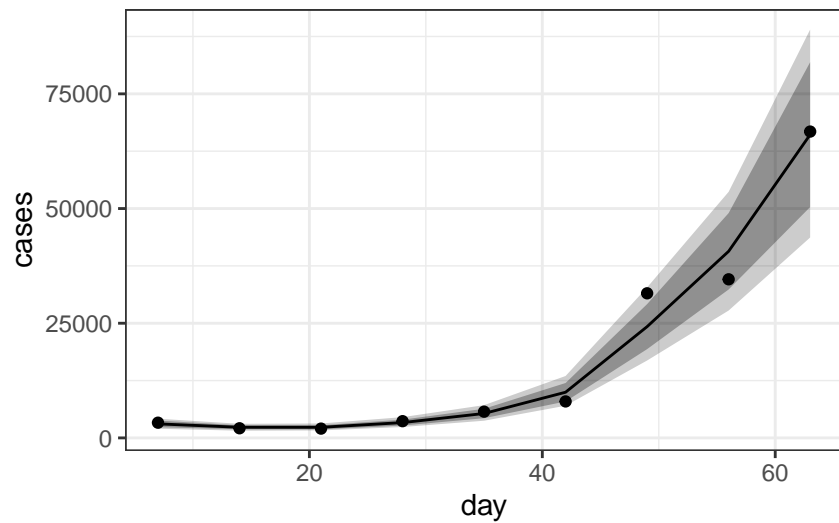

Singapore  
daily data, daily predictions

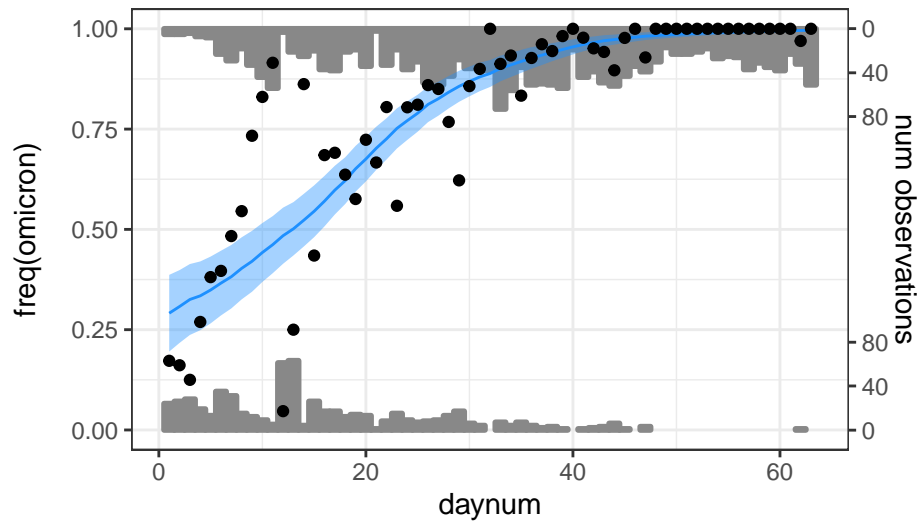

Singapore  
weekly data, weekly predictions

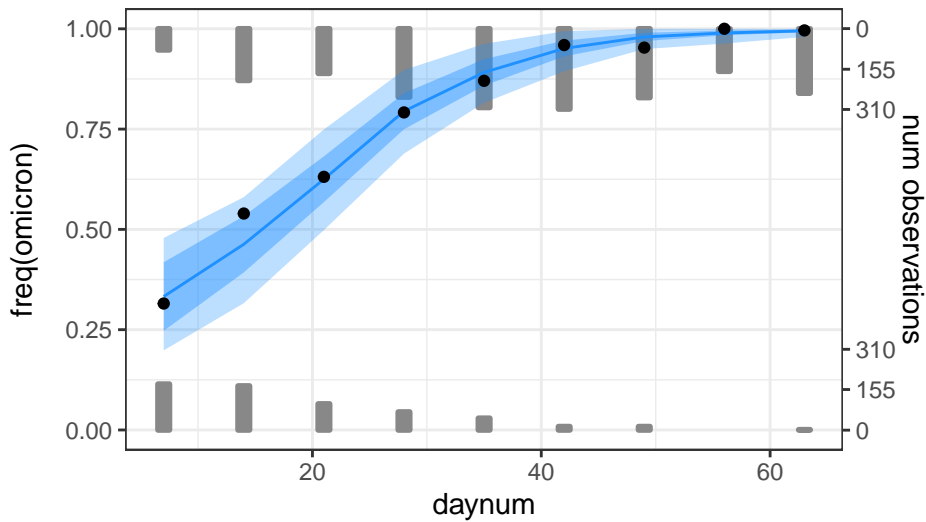

Singapore  
daily predictions

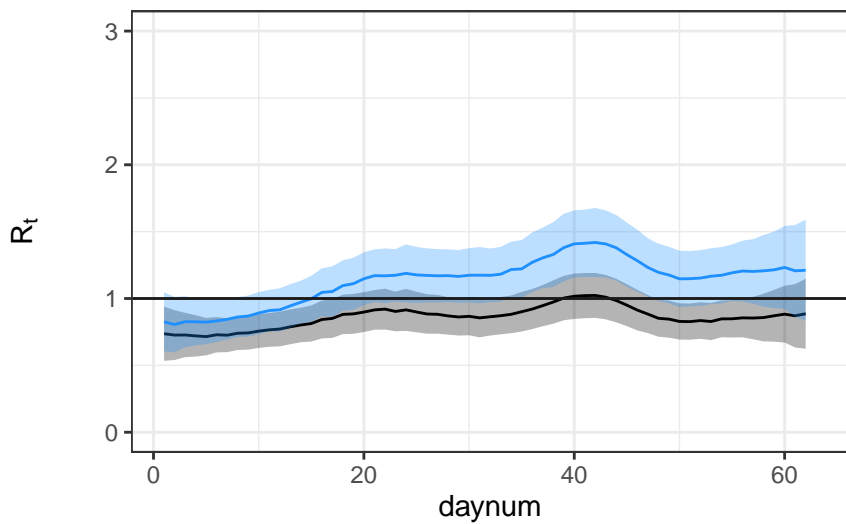

Slovakia  
daily data, daily predictions

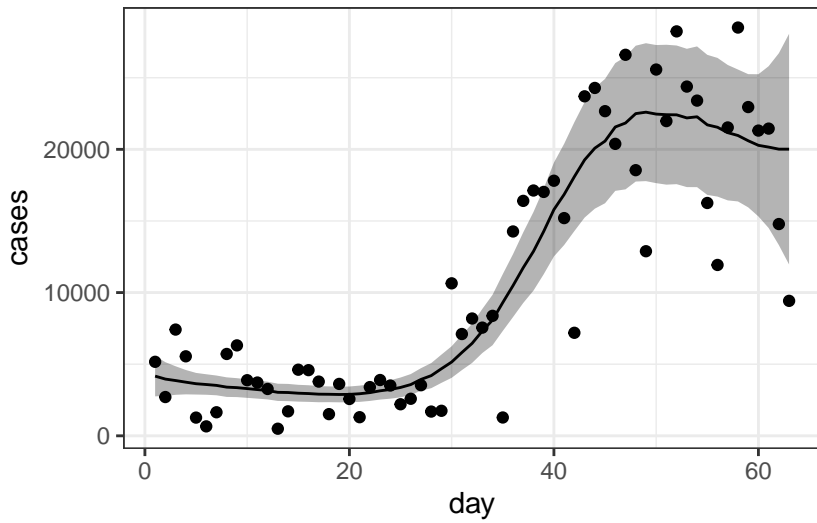

Slovakia  
weekly data, weekly predictions

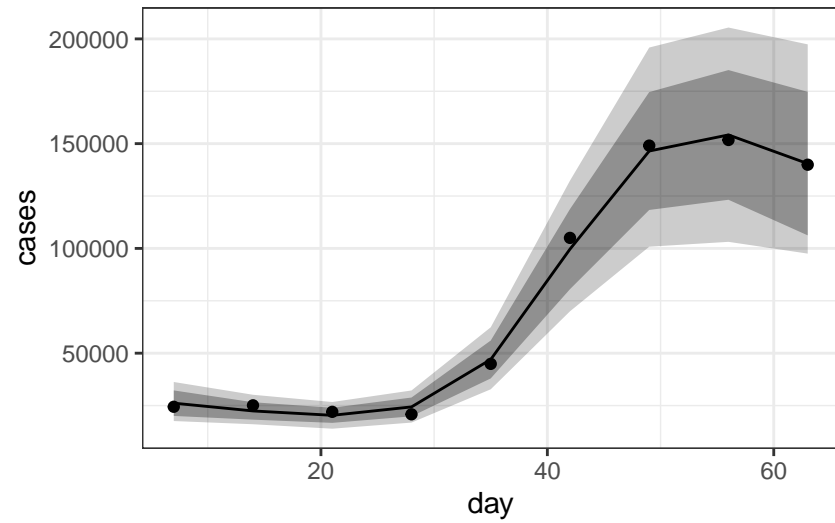

Slovakia  
daily data, daily predictions

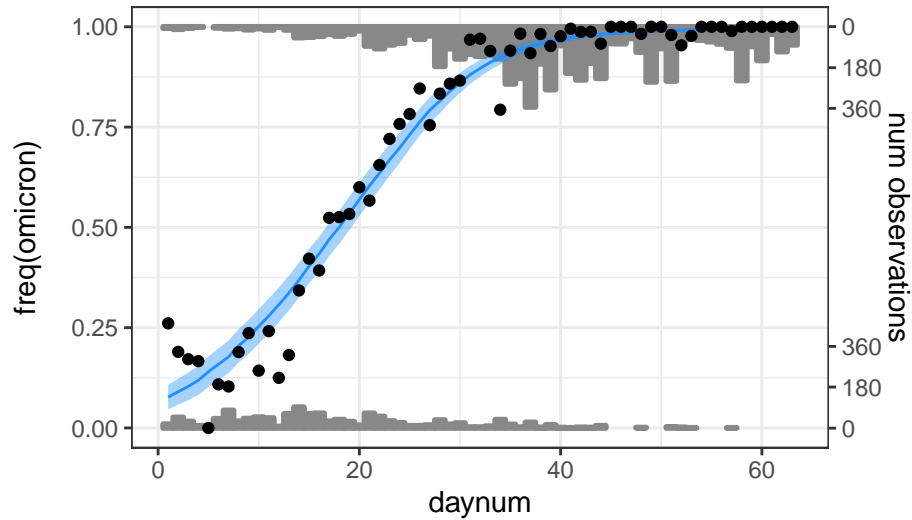

Slovakia  
weekly data, weekly predictions

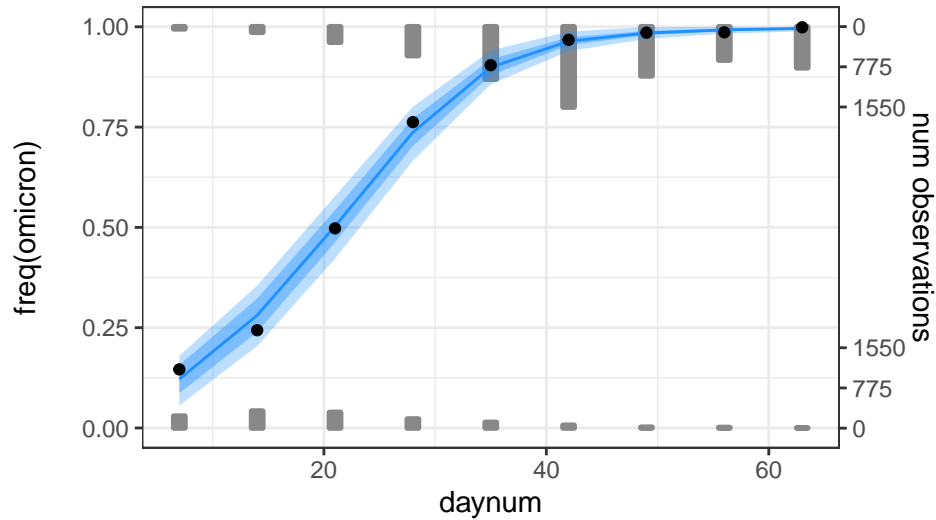

Slovakia  
daily predictions

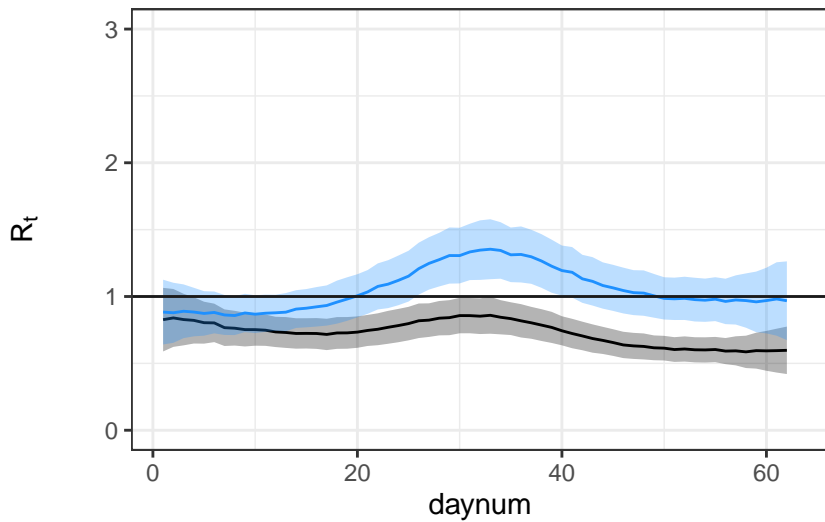

Slovenia  
daily data, daily predictions

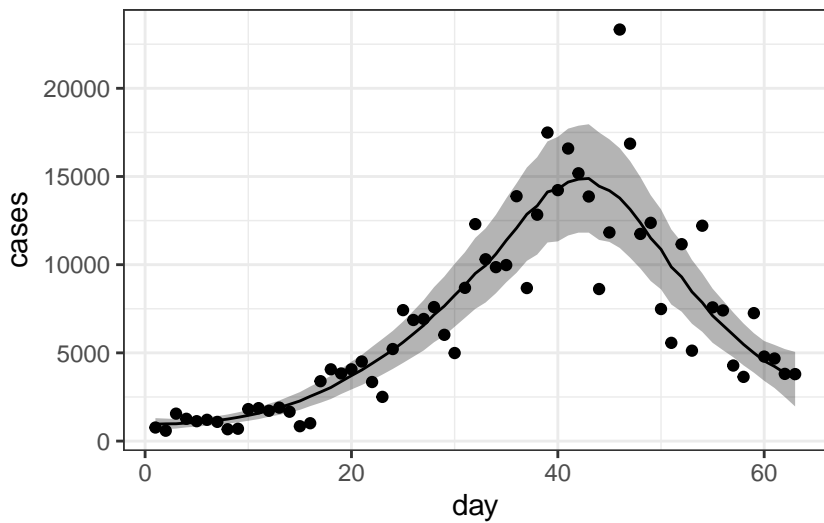

Slovenia  
weekly data, weekly predictions

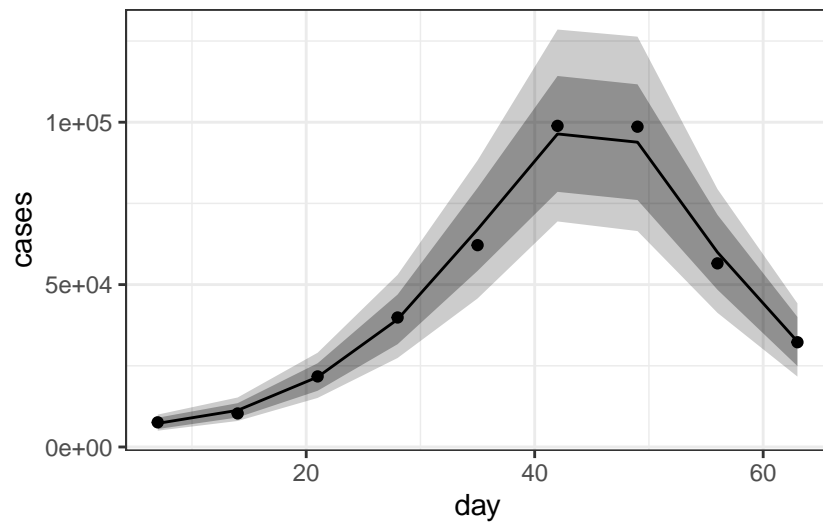

Slovenia  
daily data, daily predictions

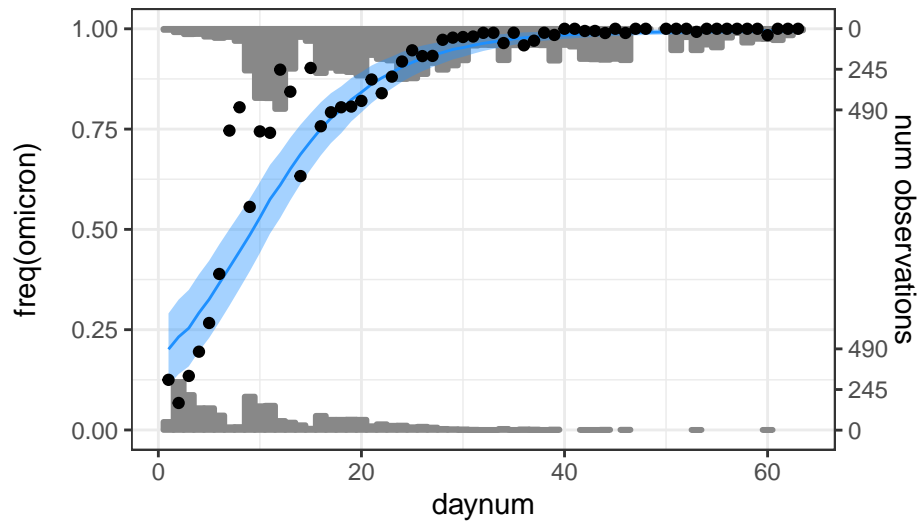

Slovenia  
weekly data, weekly predictions

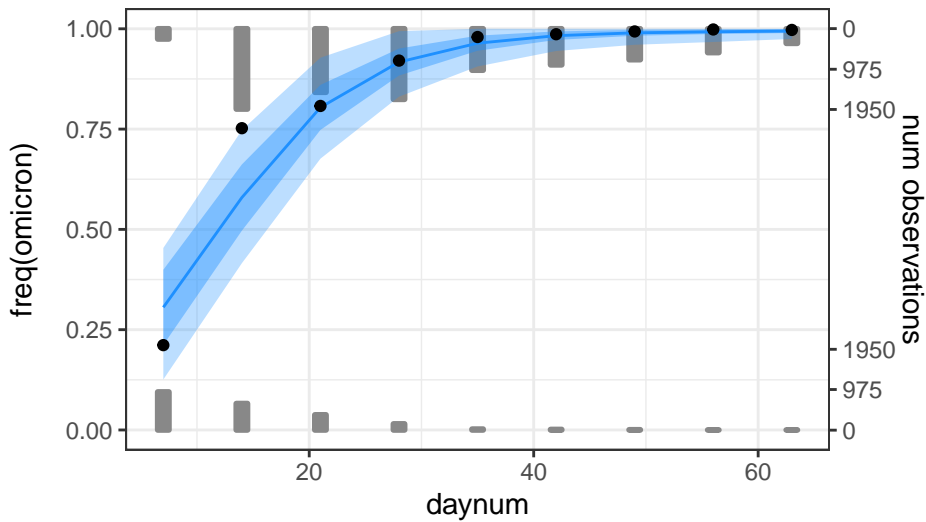

Slovenia  
daily predictions

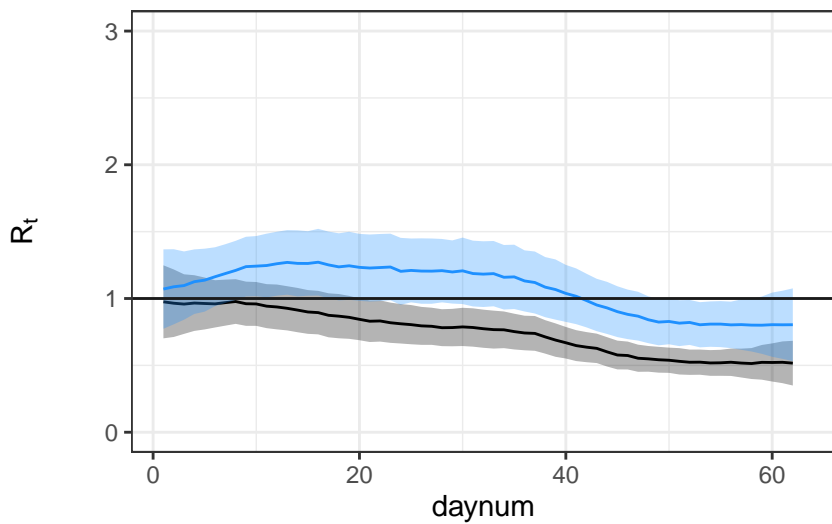



South Korea  
daily data, daily predictions

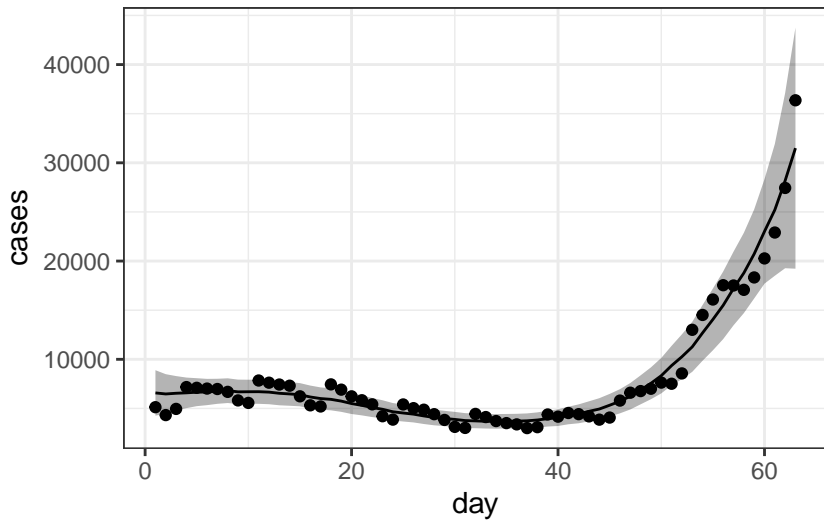

South Korea  
weekly data, weekly predictions

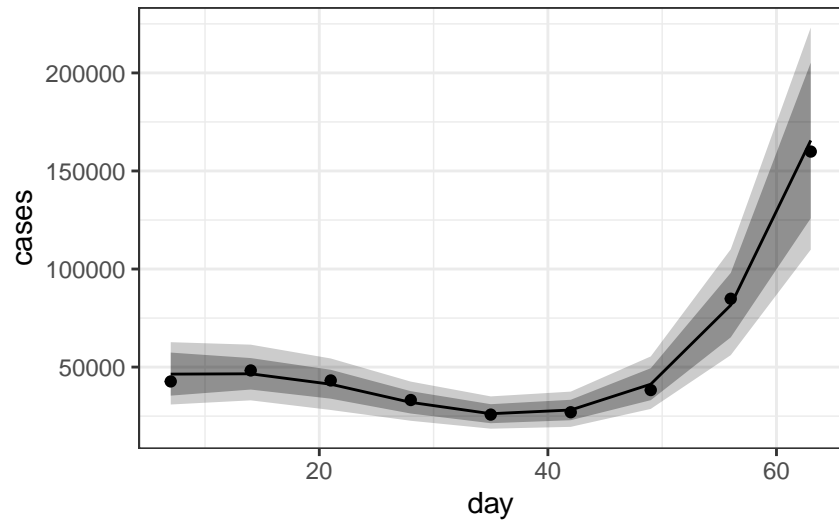

South Korea  
daily data, daily predictions

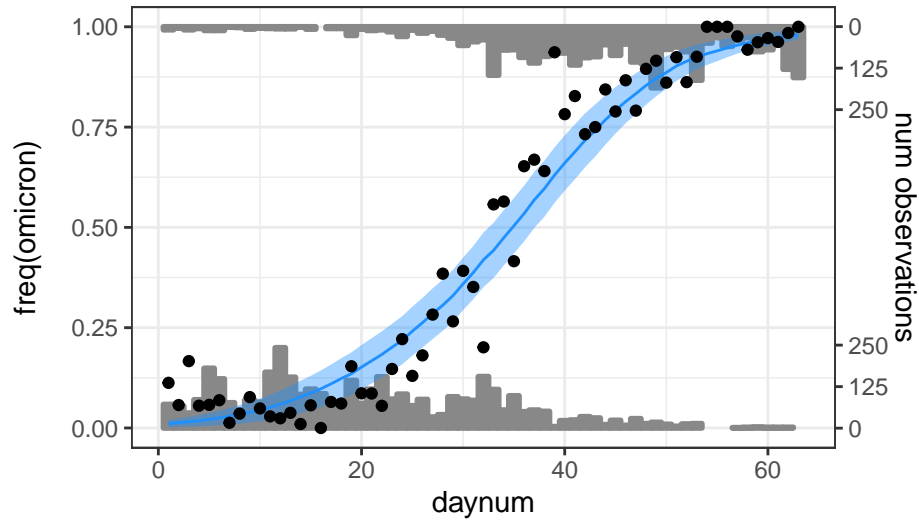

South Korea  
weekly data, weekly predictions

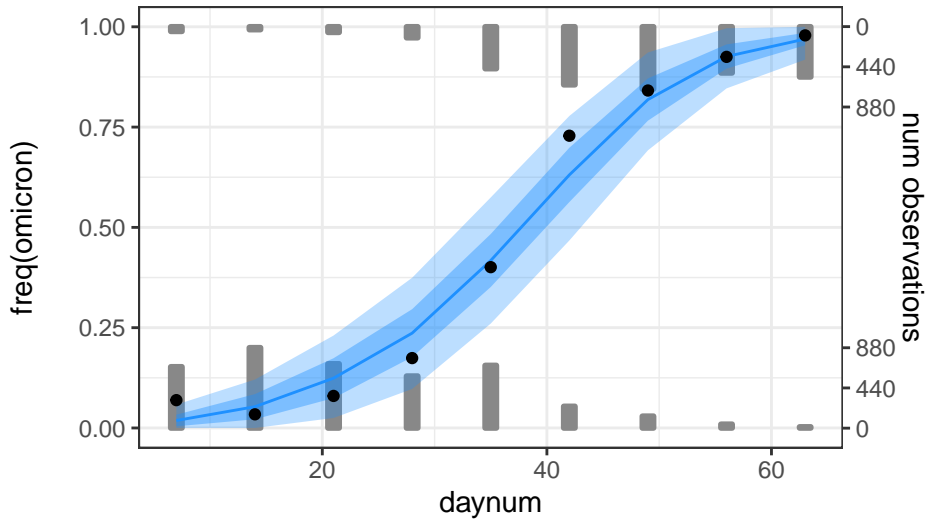

South Korea  
daily predictions

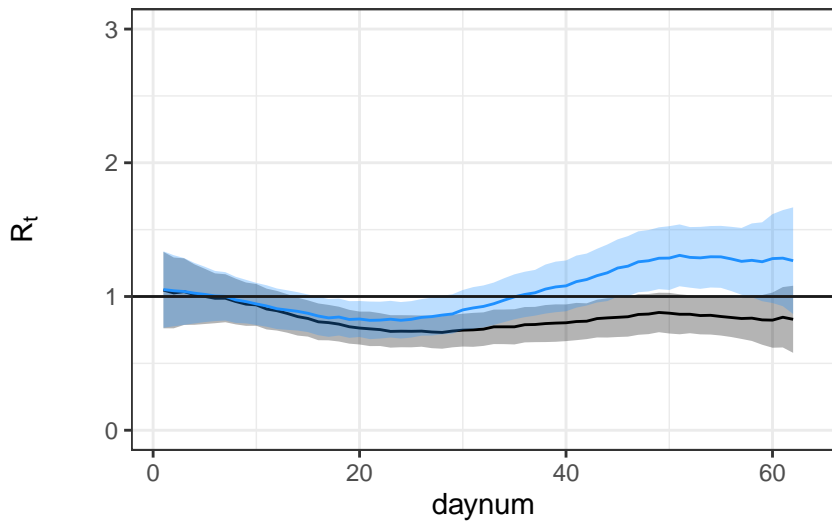

Spain  
daily data, daily predictions

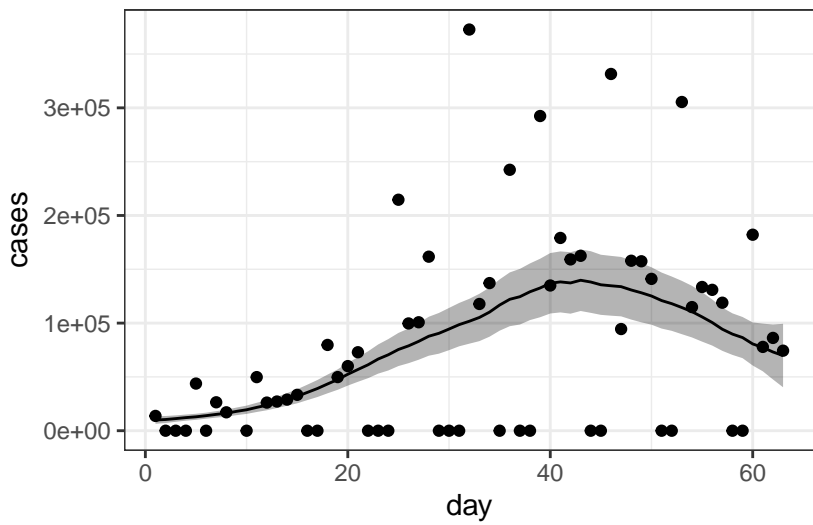

Spain  
weekly data, weekly predictions

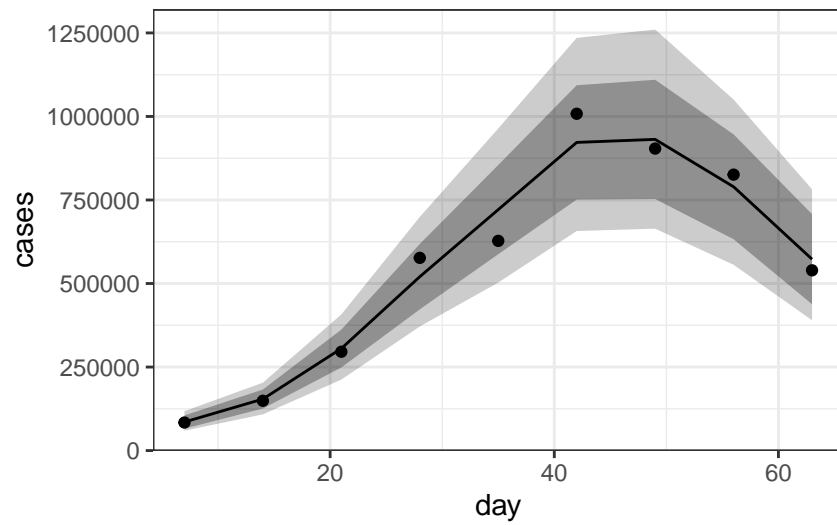

Spain  
daily data, daily predictions

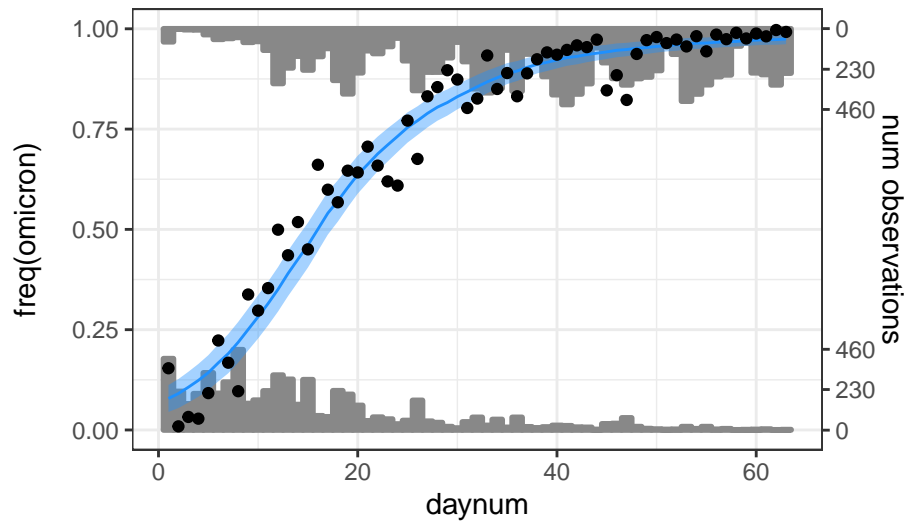

Spain  
weekly data, weekly predictions

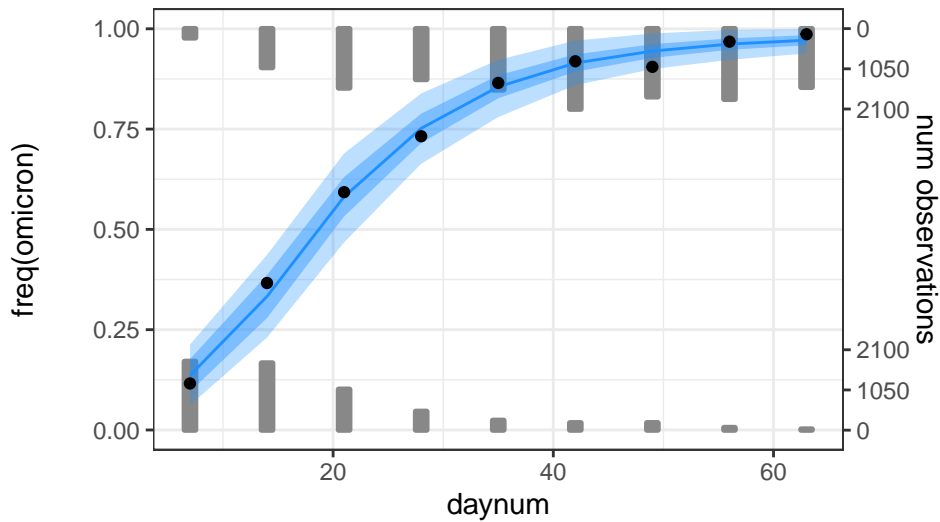

Spain  
daily predictions

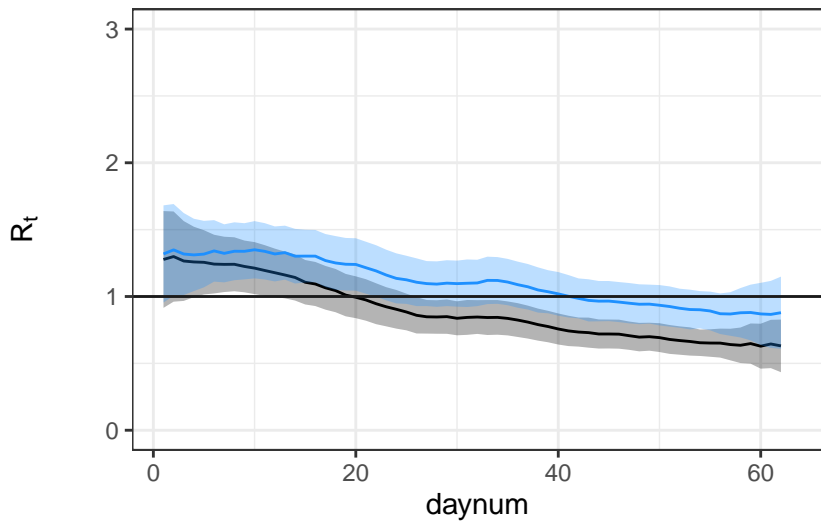

### Sweden

daily data, daily predictions

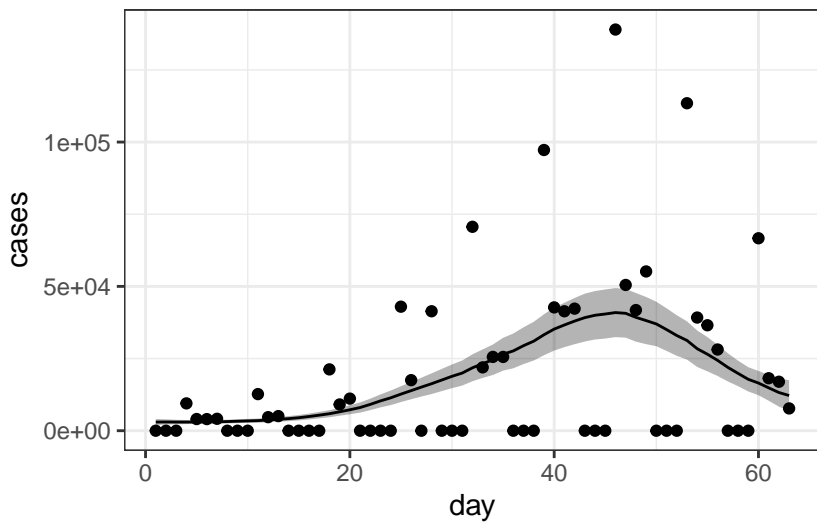

### Sweden

weekly data, weekly predictions

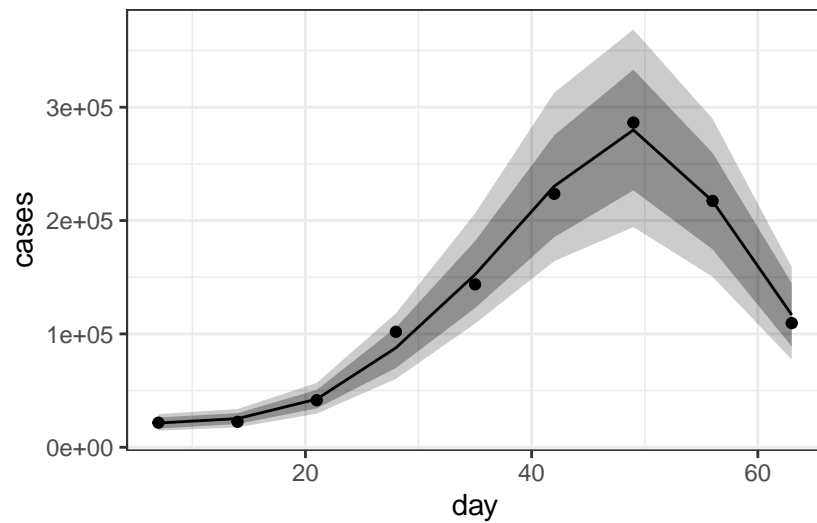

### Sweden

daily data, daily predictions

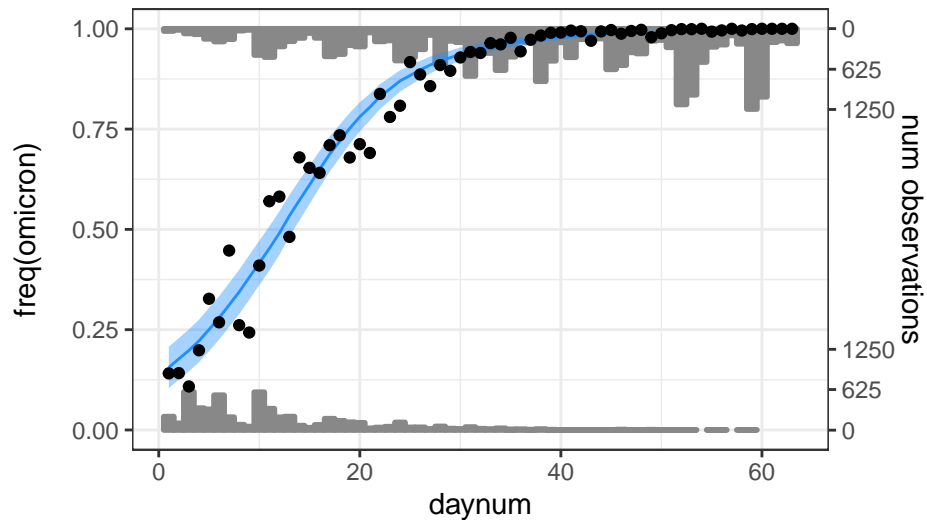

### Sweden

weekly data, weekly predictions

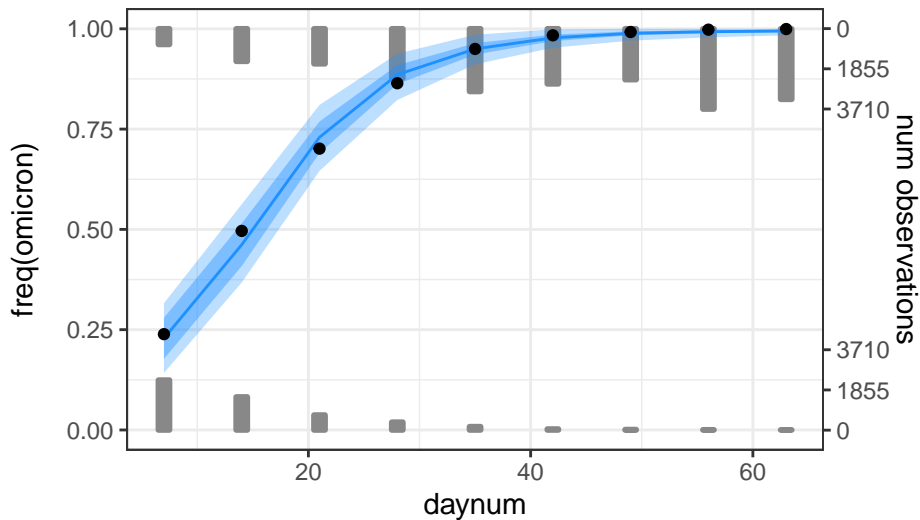

### Sweden

daily predictions

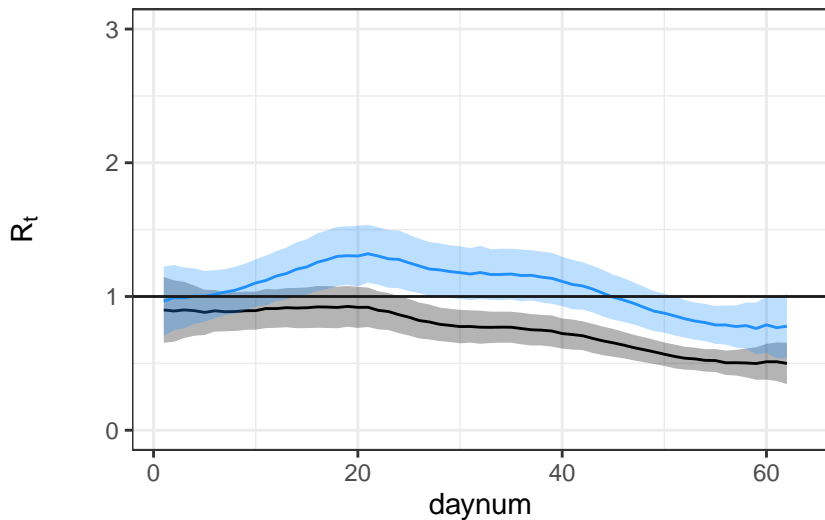

Switzerland  
daily data, daily predictions

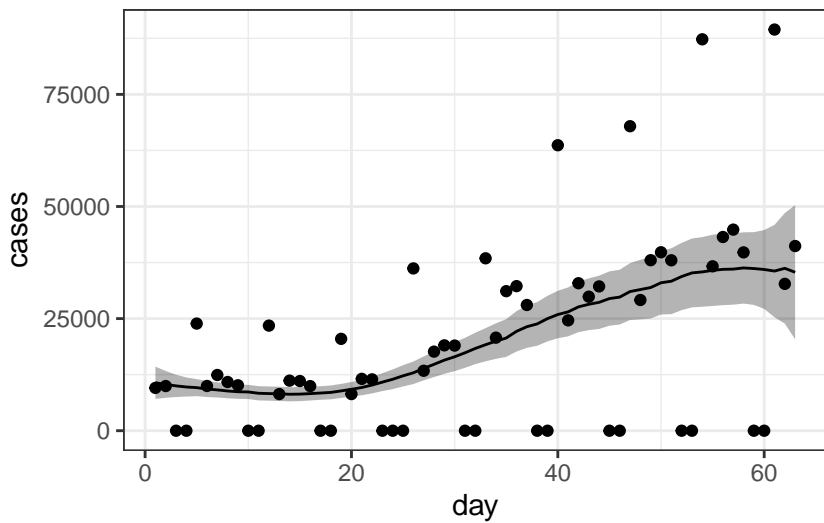

Switzerland  
weekly data, weekly predictions

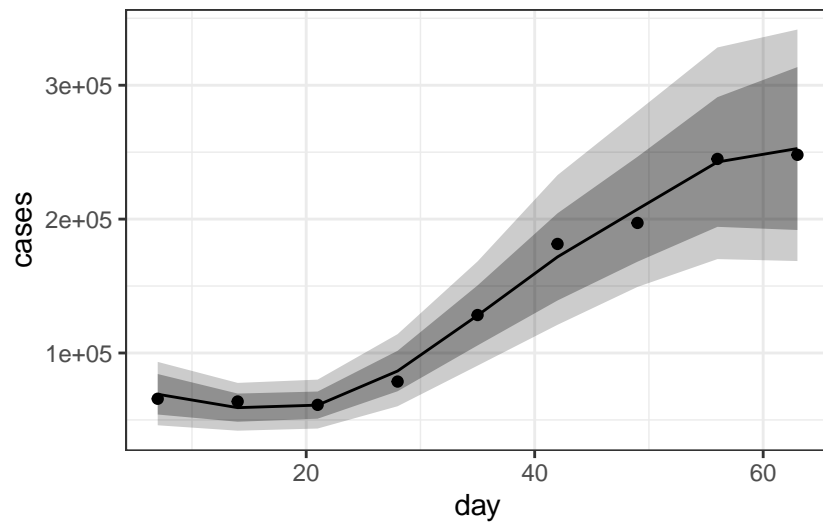

Switzerland  
daily data, daily predictions

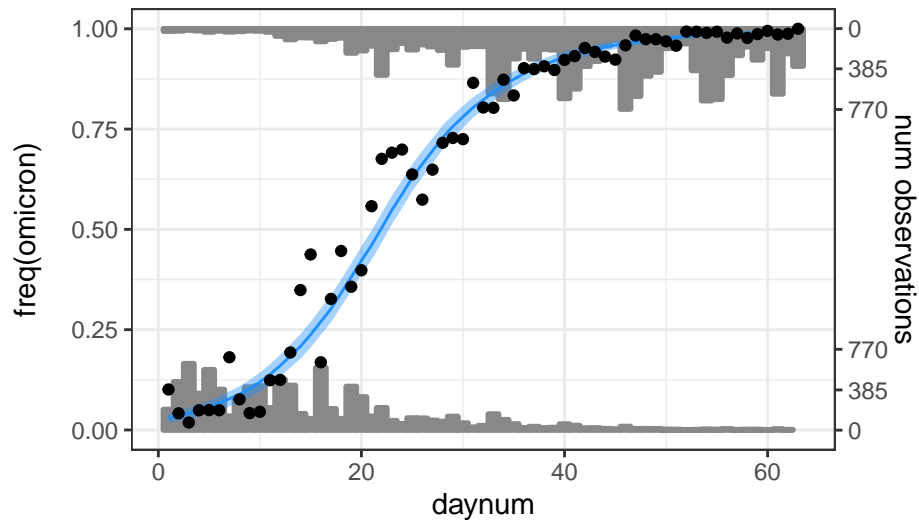

Switzerland  
weekly data, weekly predictions

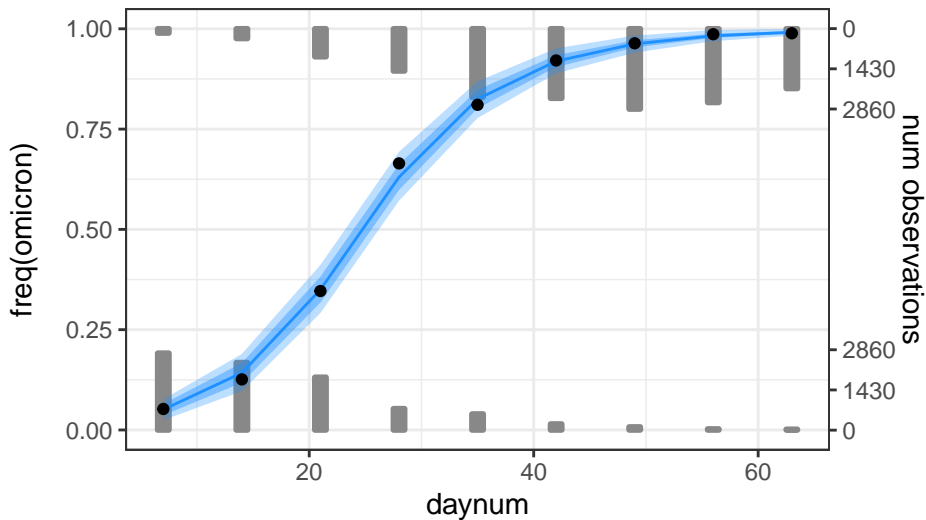

Switzerland  
daily predictions

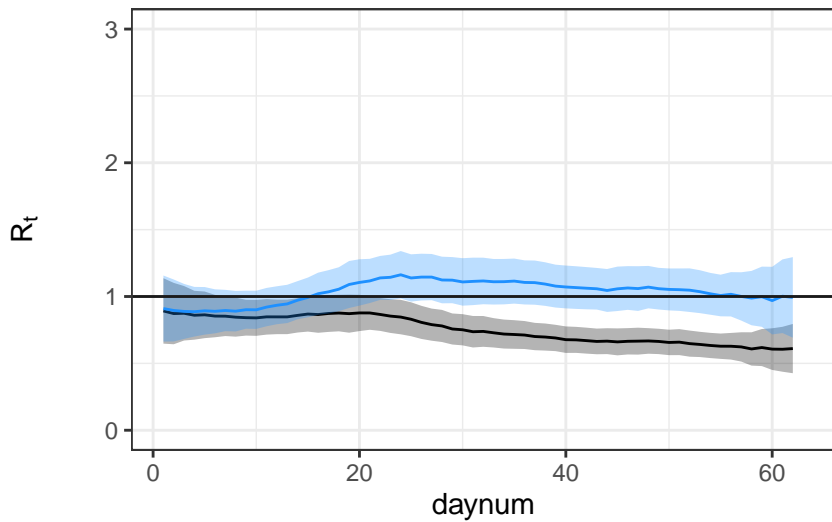

### Thailand

daily data, daily predictions

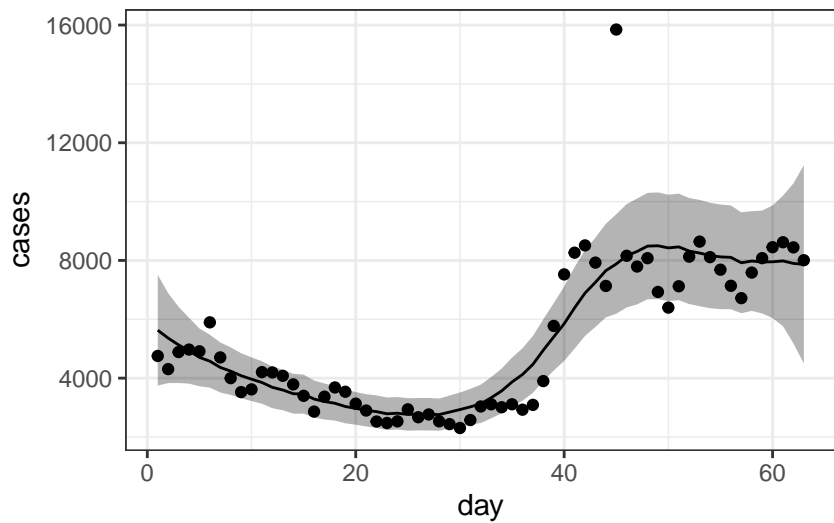

### Thailand

weekly data, weekly predictions

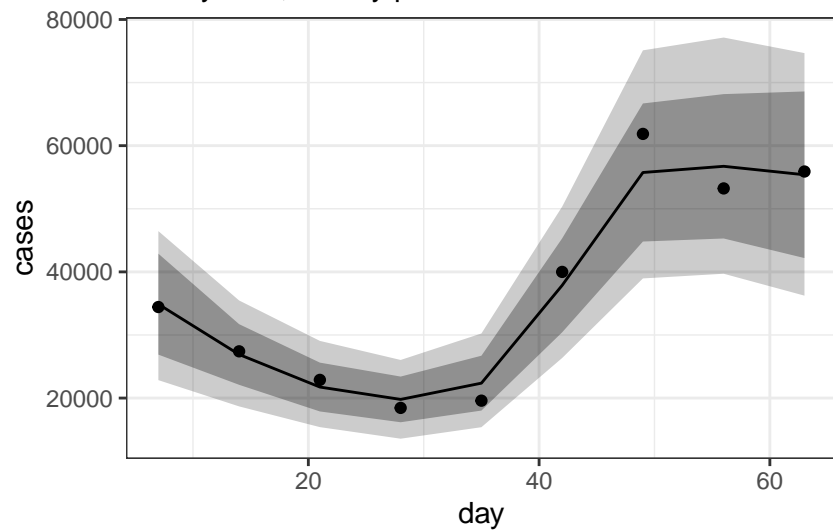

### Thailand

daily data, daily predictions

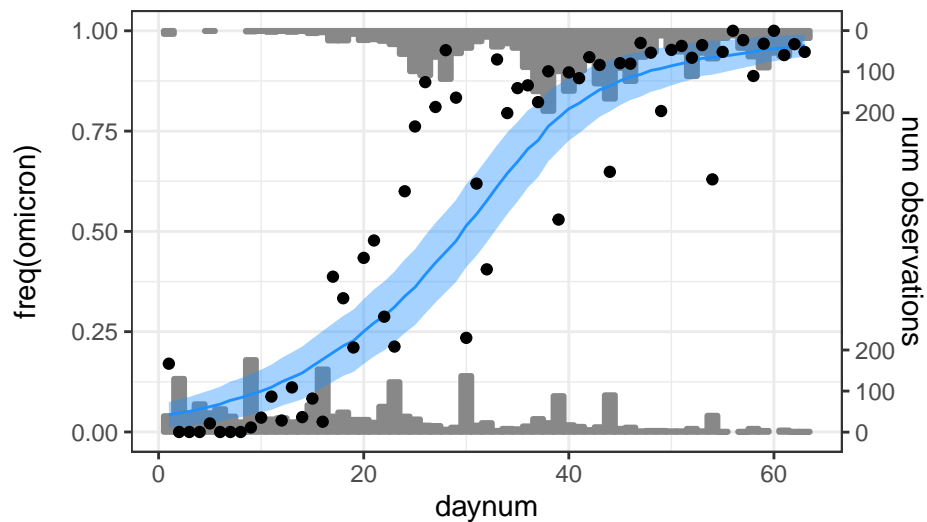

### Thailand

weekly data, weekly predictions

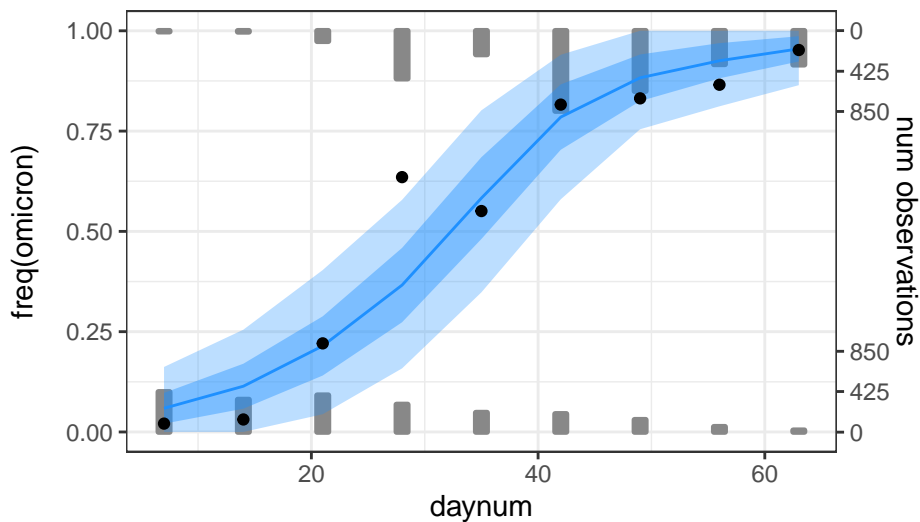

### Thailand

daily predictions

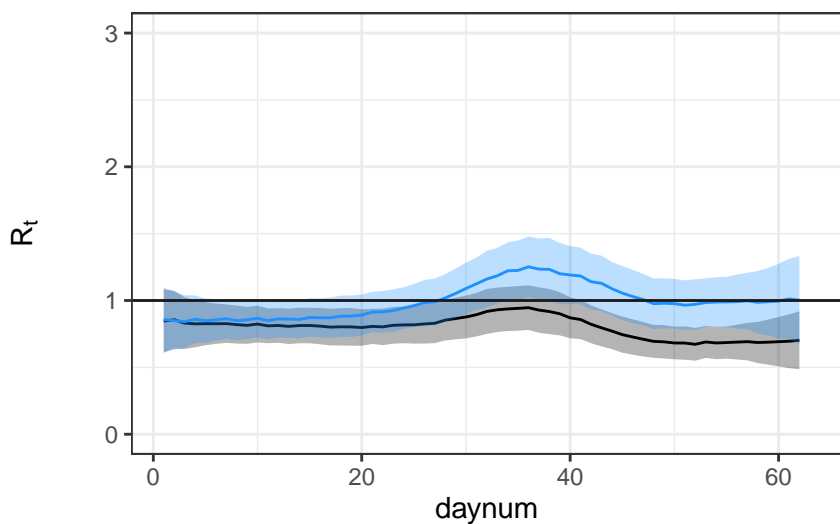

### Turkey

daily data, daily predictions

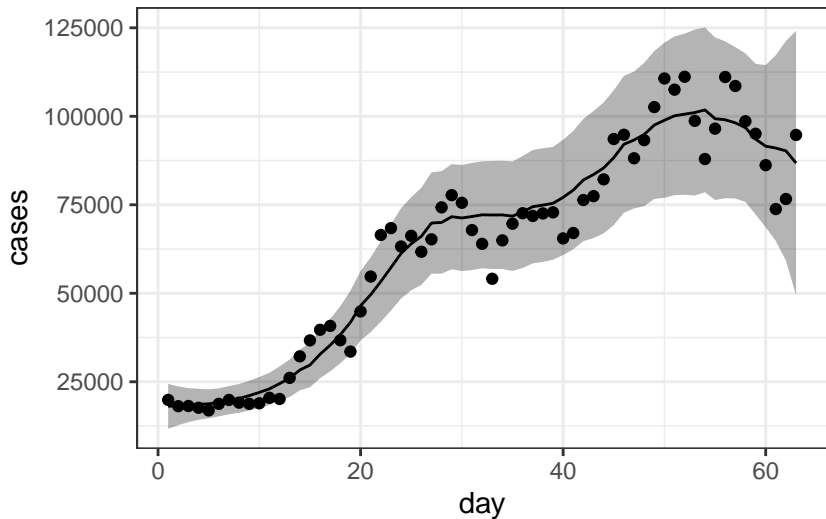

### Turkey

weekly data, weekly predictions

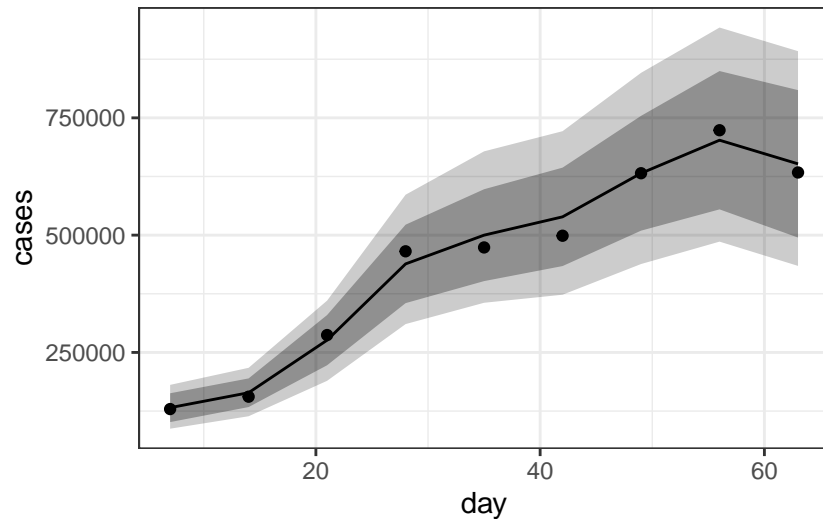

### Turkey

daily data, daily predictions

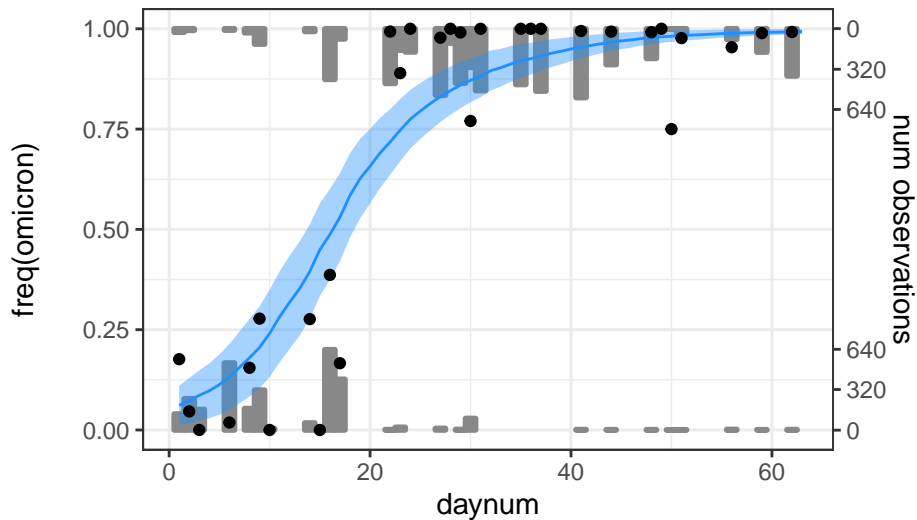

### Turkey

weekly data, weekly predictions

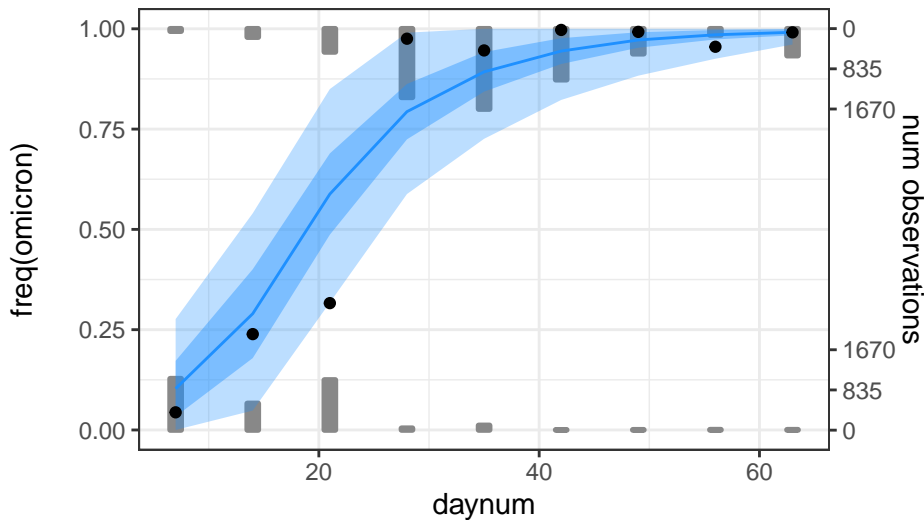

### Turkey

daily predictions

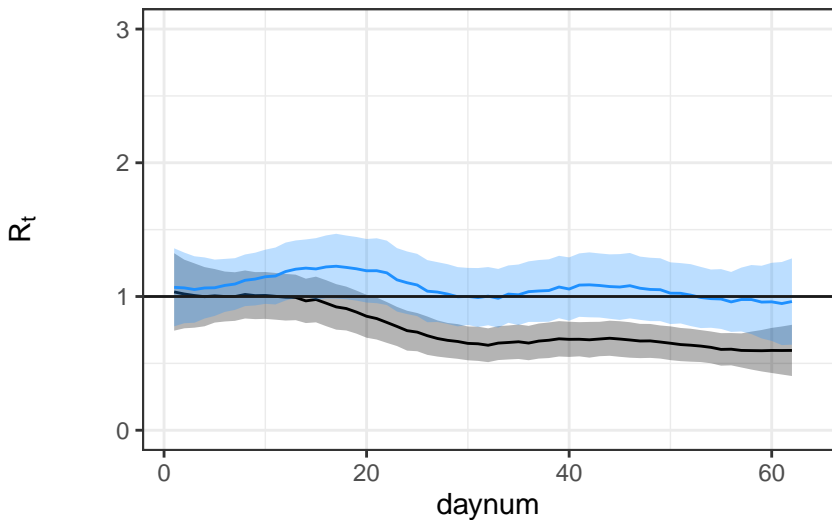

United Kingdom  
daily data, daily predictions

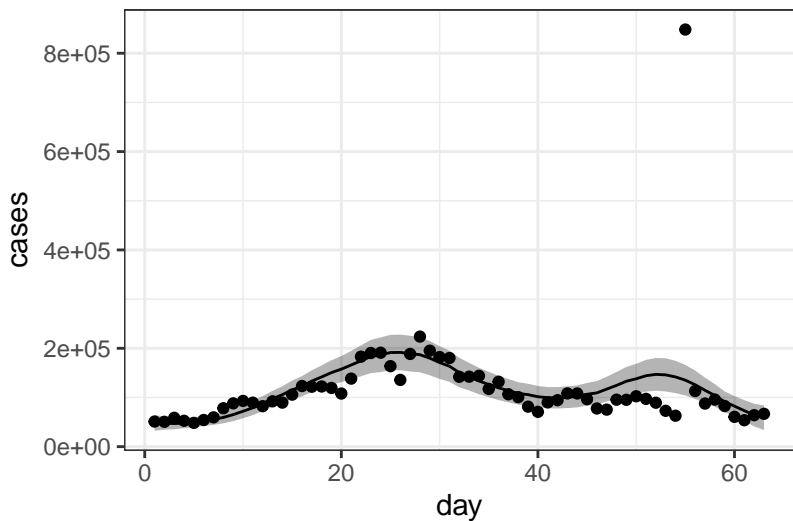

United Kingdom  
weekly data, weekly predictions

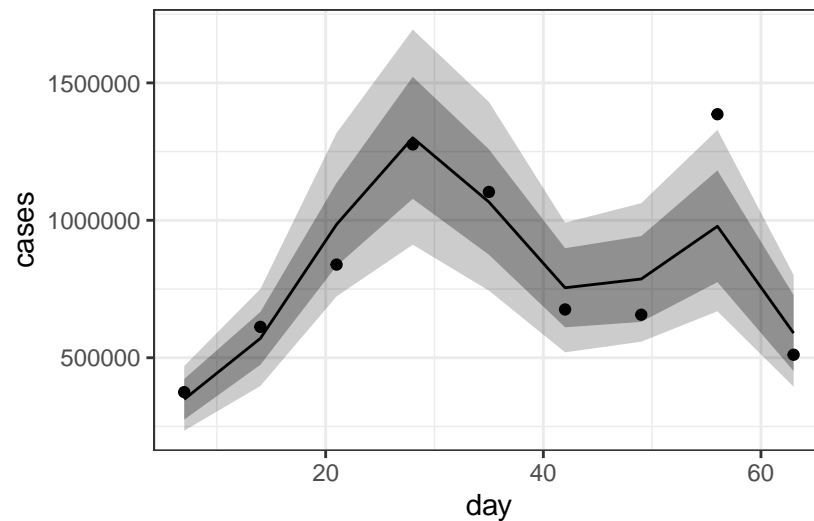

United Kingdom  
daily data, daily predictions

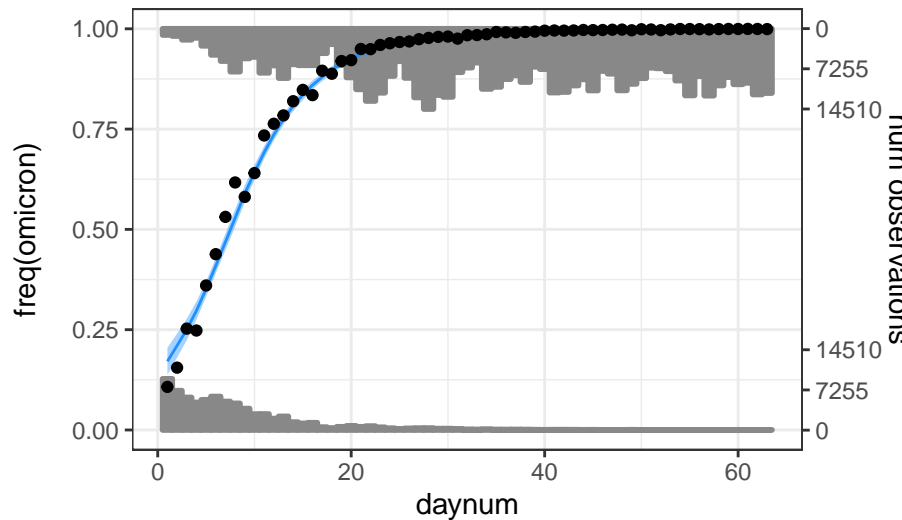

United Kingdom  
weekly data, weekly predictions

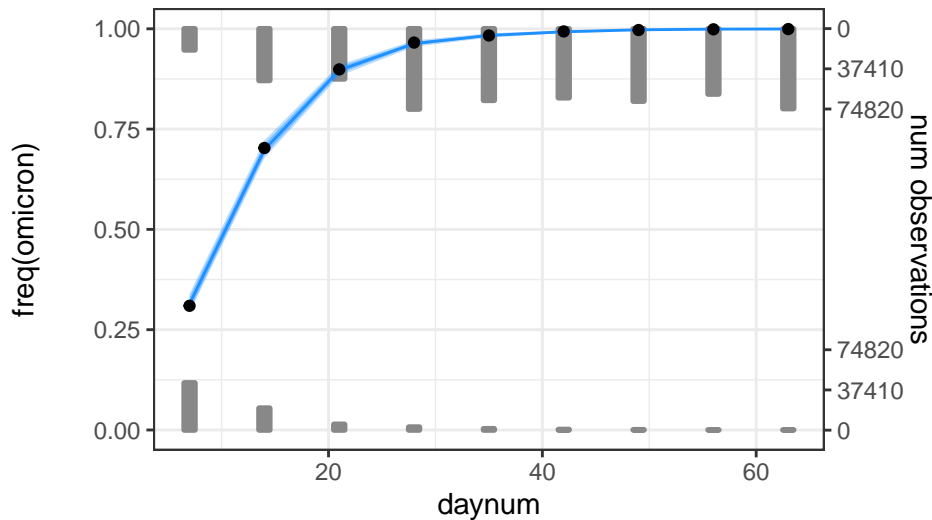

United Kingdom  
daily predictions

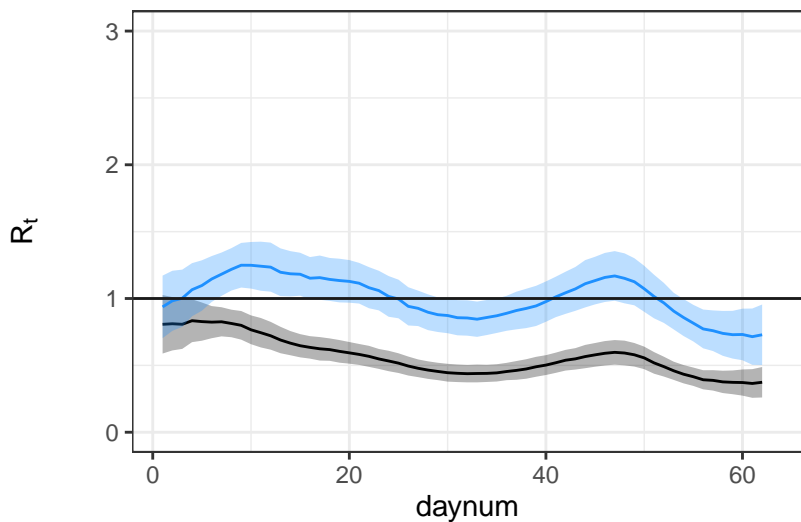

United States  
daily data, daily predictions

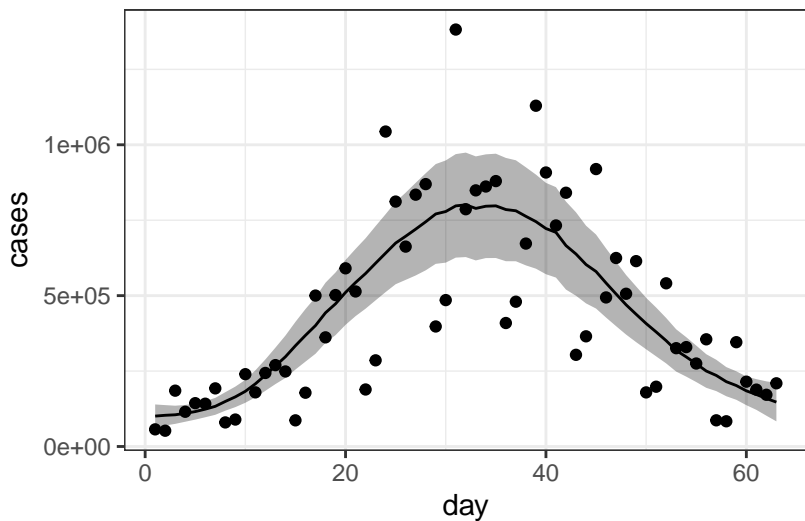

United States  
weekly data, weekly predictions

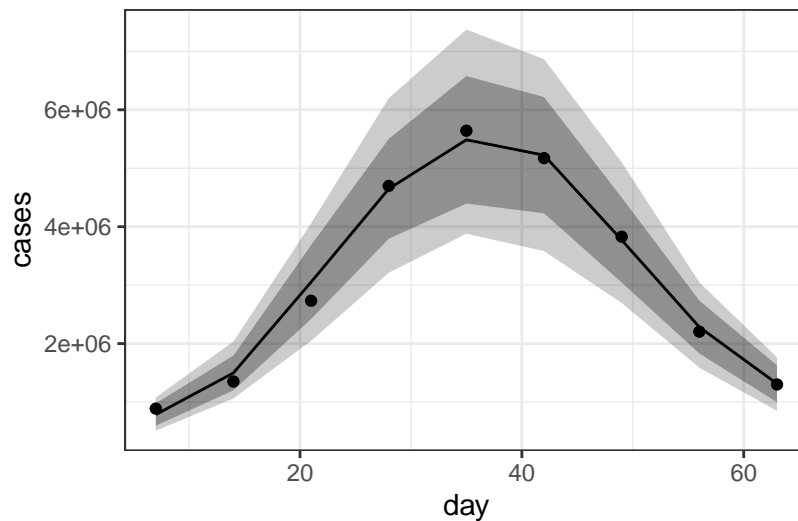

United States  
daily data, daily predictions

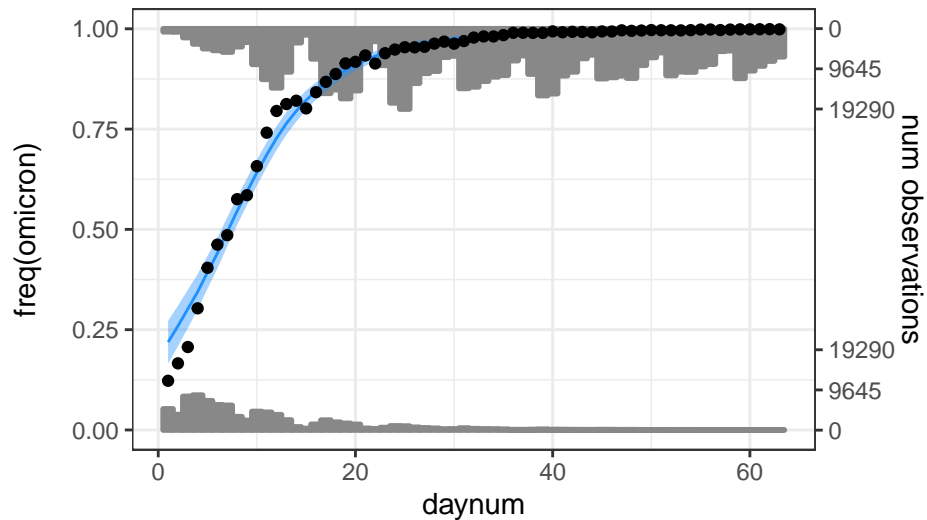

United States  
weekly data, weekly predictions

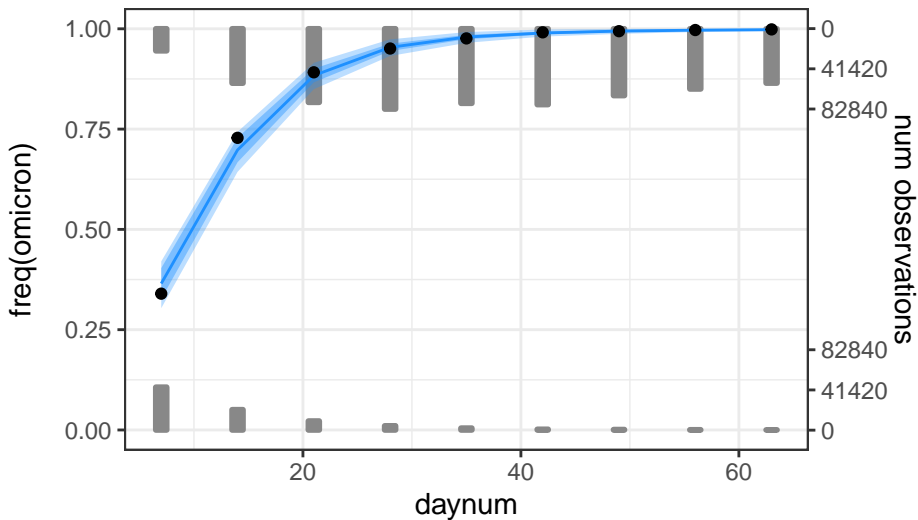

United States  
daily predictions

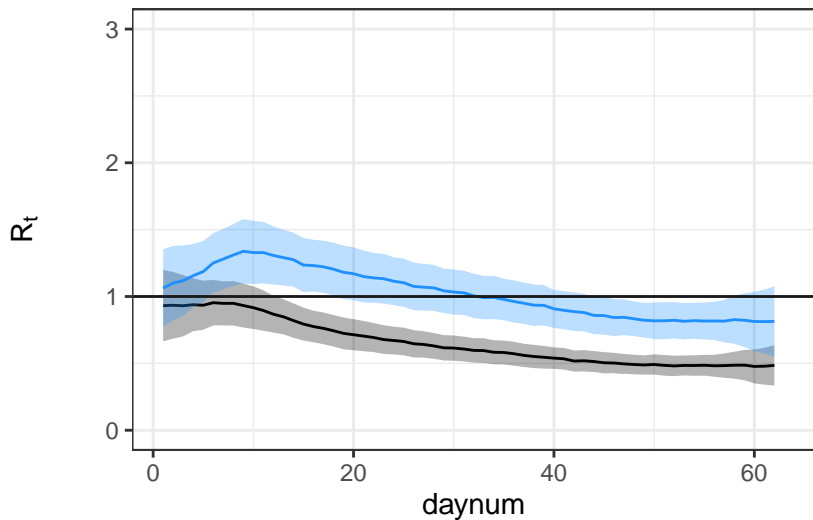

Supplement: Supplementary file [file media-1.pdf]
